# Supplementary material for: Plant-to-plant communication triggered by systemin primes anti-herbivore resistance in tomato
Source: PubMed Central journal article supplement (PMC5686165; doi:10.1038/s41598-017-15481-8), 2017-11-14
Supplement: 41598_2017_15481_MOESM1_ESM.pdf [file 41598_2017_15481_MOESM1_ESM.pdf]

## SUPPLEMENTARY INFORMATION

### **Plant-to-plant communication triggered by systemin primes anti-herbivore resistance in tomato**

Mariangela Coppola<sup>1</sup>, Pasquale Cascone<sup>2</sup>, Valentina Madonna<sup>1</sup>, Ilaria Di Lelio<sup>1</sup>, Francesco Esposito<sup>1</sup>, Concetta Avitabile<sup>3</sup>, Alessandra Romanelli<sup>4</sup>, Emilio Guerrieri<sup>2</sup>, Alessia Vitiello<sup>1</sup>, Francesco Pennacchio<sup>1</sup>, Rosa Rao<sup>1,\*</sup> & Giandomenico Corrado<sup>1,\*</sup>

<sup>1</sup>Dipartimento di Agraria, Università degli Studi di Napoli Federico II, Via Università 100, 80055 Portici, NA, Italy. <sup>2</sup>Istituto per la Protezione Sostenibile delle Piante, CNR, Portici, NA, Italy. <sup>3</sup>Istituto di Biostrutture e Bioimmagini (CNR), via Mezzocannone 16, 80134 Napoli. <sup>4</sup>Dipartimento di Farmacia, Università degli Studi di Napoli Federico II, Via Università 100, 80055 Portici, NA, Italy.

\*Correspondence and requests for materials should be addressed to R.R. (email: rao@unina.it) or G.C. (email: giandomenico.corrado@unina.it)

**Supplementary Table 1.** RNA-seq raw data processing. Three biological replicates (pt) were used for R-S1 and R-S4 plants. See Table 1 for plant code.

| Sample             | Number of raw reads<br>(sum of pairs) | Number of trimmed reads (sum of pairs) | % Trimmed | Number of Mapped reads | % of Mapping | % of Unique Mapping | Unmapped Reads | % Unmapped reads |
|--------------------|---------------------------------------|----------------------------------------|-----------|------------------------|--------------|---------------------|----------------|------------------|
| R-S4 pt 1          | 30484562                              | 29676046                               | 97.35     | 27286820               | 91.95        | 98.4                | 7385           | 0.02             |
| R-S4 pt 2          | 62711700                              | 60810566                               | 96.97     | 56404664               | 92.75        | 98.5                | 13823          | 0.02             |
| R-S4 pt 3          | 70072920                              | 68379904                               | 97.58     | 63844120               | 93.37        | 98.4                | 12858          | 0.02             |
| R-S1 pt 1          | 72317900                              | 70590274                               | 97.61     | 65565860               | 92.88        | 98.3                | 23305          | 0.03             |
| R-S1 pt 2          | 76132340                              | 74167434                               | 97.42     | 69792384               | 94.10        | 98.4                | 19037          | 0.03             |
| R-S1 pt 3          | 74669200                              | 71965232                               | 96.38     | 67566640               | 93.89        | 98.4                | 17347          | 0.02             |
| Total              | 386388622                             | 375589456                              |           | 350460488              |              |                     | 93755          |                  |
| Average            | 64398103.67                           | 62598242.67                            | 97.22     | 58410081.33            | 93.16        | 98.4                | 15625.83       | 0.02             |
| Standard deviation | 17268970.45                           | 16768742.77                            | 0.47      | 15917364.23            | 0.80         | 0.06                | 5520.70        | 0.00             |

**Supplementary Table 2.** Real Time RT-PCR confirmation of the RNA-seq analysis. The data of qRT-PCR are means of three independent biological replicates (each in two technical replicates).

| Gene ID        | Description                   | log <sub>2</sub> fold change |                  |
|----------------|-------------------------------|------------------------------|------------------|
|                |                               | RNA-seq                      | Real Time RT-PCR |
| Solyc04g074900 | 40S ribosomal protein         | 1.96                         | 1.55             |
| Solyc08g082630 | Auxin response factor 9       | 1.88                         | 1.28             |
| Solyc04g077210 | Knotted-like homeobox protein | 3.77                         | 1.19             |
| Solyc03g119820 | Oleosin 1                     | 2.41                         | 1.33             |
| Solyc05g046020 | Peroxidase 3                  | 1.97                         | -0.74            |
| Solyc02g089620 | Proline dehydrogenase 2       | 1.88                         | 1.10             |
| Solyc03g033350 | Proteinase Inhibitor I        | 1.36                         | 0.93             |
| Solyc03g020030 | Proteinase Inhibitor II       | 1.96                         | 0.95             |
| Solyc02g078690 | Serine carboxypeptidase       | 2.31                         | 1.96             |
| Solyc09g015770 | WRKY 40                       | 1.24                         | 2.09             |

**Supplementary Table 3.** List of differentially up-regulated genes identified by RNA-seq upon exposition of receiver plants to Sys-treated plants.

The table reports the locus id, the gene description, the log<sub>2</sub> of the fold change (log<sub>2</sub>FC), the FDR of the differential expression, the Best Blast Hit Descriptor and the GO IDs.

| Locus            | Gene Description (ITAG 2.5)                                                                                                                                                               | Log2FC | FDR      | Best Blast Hit Descriptor                                | GO ID                              |
|------------------|-------------------------------------------------------------------------------------------------------------------------------------------------------------------------------------------|--------|----------|----------------------------------------------------------|------------------------------------|
| Solyc07g064380.2 | Serine/threonine-protein phosphatase 7 long form homolog V1 *--- PPP7L_ARATH); contains Interpro domain(s) IPR019557 Aminotransferase-like, plant mobile domain                           | 5.45   | 3.06E-05 | Serine threonine-protein phosphatase 7 long form homolog |                                    |
| Solyc10g054900.1 | Proline-rich protein (AHRD V1 ***- Q9M6T7_NICGL); Interpro domain(s) IPR010616 Protein of unknown function DUF1210                                                                        | 4.99   | 2.46E-03 | Proline-rich protein 4                                   |                                    |
| Solyc07g040960.1 | Os07g0175100 protein (Fragment) (AHRD V1 *---                                                                                                                                             | 4.3    | 2.68E-04 | Nuclease harbi1                                          | GO:0004623; GO:0006644; GO:0016042 |
| Solyc10g018190.1 | 1-aminocyclopropane-1-carboxylate oxidase (AHRD V1 **-- ACCO_MUSAC); Interpro domain(s) IPR005123 Oxoglutarate and iron-dependent oxygenase                                               | 4.21   | 1.12E-03 | Hyoscyamine 6-dioxygenase                                | GO:0016491                         |
| Solyc04g077210.2 | Knotted-like homeobox protein (AHRD V1 ***- contains Interpro domain(s) IPR005541 KNOX2                                                                                                   | 3.77   | 1.52E-08 | Homeobox protein knotted-1                               | GO:0003677; GO:0045449             |
| Solyc06g062560.1 | Phosphatase (AHRD V1 ***- D2V497_NAEGR); contains domain(s) IPR016965 Pyridoxal phosphate phosphatase, PHOSPHO2                                                                           | 3.76   | 1.83E-04 | Inorganic pyrophosphatase 1                              | GO:0016791                         |
| Solyc01g090890.2 | Xenotropic and polytropic retrovirus receptor (AHRD **-- B2GU54_XENTR); contains Interpro domain(s) IPR004331 SPX, N-terminal                                                             | 3.4    | 8.46E-05 | Spx domain-containing protein 3                          |                                    |
| Solyc01g091590.2 | SRC2 protein (AHRD V1 ***- A7XAJ8_9CONI); Interpro domain(s) IPR000008 C2 calcium-dependent membrane targeting                                                                            | 3.34   | 1.34E-03 | Bon1-associated protein 2                                | GO:0005515; GO:0005543             |
| Solyc08g067230.2 | MADS box transcription factor (AHRD V1 A7LK41_POPDE); contains Interpro domain(s) IPR002100 Transcription factor, MADS-box                                                                | 3.22   | 2.88E-03 | Type ii mads-box transcription partial                   | GO:0003700; GO:0005634; GO:0006355 |
| Solyc01g094380.2 | Glycosyltransferase CAZy family GT90 (Fragment) (AHRD **-- D8SQN9_SELML); contains Interpro domain(s) IPR008539 Protein of unknown function DUF821, CAP10-like                            | 2.93   | 9.37E-05 | O-glucosyltransferase rumi homolog                       |                                    |
| Solyc04g074420.1 | Phi-1 protein (Fragment) (AHRD V1 ***- contains Interpro domain(s) IPR006766 Phosphate-induced protein 1 conserved region                                                                 | 2.9    | 1.24E-05 | Unknown Protein                                          |                                    |
| Solyc03g082430.1 | Growth-regulating factor 4 (AHRD V1 *--- contains Interpro domain(s) IPR014977 WRC                                                                                                        | 2.84   | 2.50E-04 | Growth-regulating factor 7                               | GO:0005634                         |
| Solyc03g093560.1 | Ethylene-responsive transcription factor 2 (AHRD V1 B6U860_MAIZE); contains Interpro domain(s) IPR001471 Pathogenesis-related transcriptional factor and ERF, DNA-binding                 | 2.76   | 8.10E-04 | Ethylene-responsive transcription factor 5               | GO:0003700; GO:0006355             |
| Solyc06g074030.1 | CCR4-NOT transcription complex subunit 7 (AHRD ***- B4FG48_MAIZE); contains Interpro domain(s) IPR006941 Ribonuclease CAF1                                                                | 2.7    | 1.26E-04 | Probable ccr4-associated factor 1 homolog 11             | GO:0003676                         |
| Solyc04g074440.1 | Os06g0220000 protein (Fragment) (AHRD V1 ***- contains Interpro domain(s) IPR006766 Phosphate-induced protein 1 conserved region                                                          | 2.57   | 1.25E-04 | Protein exordium                                         |                                    |
| Solyc10g006700.1 | Calcium-binding EF hand family protein (Fragment) V1 ***- D7MEH5_ARALY); contains Interpro domain(s) IPR011992 EF-Hand type                                                               | 2.47   | 3.47E-04 | Calcium-binding protein pbp1                             | GO:0005509                         |
| Solyc03g119820.1 | Oleosin Bn-V (AHRD V1 ***- B6UIA7_MAIZE); Interpro domain(s) IPR000136 Oleosin                                                                                                            | 2.41   | 1.06E-03 | Oleosin 1                                                | GO:0012511; GO:0016021             |
| Solyc06g035530.2 | Gibberellin 20-oxidase-2 (AHRD V1 ****- Q9ZPP3_SOLLG); Interpro domain(s) IPR005123 Oxoglutarate and iron-dependent oxygenase                                                             | 2.37   | 1.80E-06 | Gibberellin 20 oxidase 1                                 | GO:0016491                         |
| Solyc01g009160.2 | Harpin-induced protein-like (Fragment) (AHRD V1 **-- contains Interpro domain(s) IPR010847 Harpin-induced 1                                                                               | 2.33   | 2.00E-04 | Protein yls9                                             |                                    |
| Solyc02g078690.1 | Serine carboxypeptidase K10B2.2 (AHRD V1 ****- contains Interpro domain(s) IPR001563 Peptidase S10, serine carboxypeptidase                                                               | 2.31   | 6.02E-07 | Serine carboxypeptidase                                  | GO:0004185; GO:0006508             |
| Solyc04g014260.1 | Zinc finger-homeodomain protein 1 (Fragment) (AHRD **-- B0LK17_YUCFI); contains Interpro domain(s) IPR006456 ZF-HD homeobox protein Cys/His-rich dimerisation region                      | 2.31   | 4.46E-05 | Zinc-finger homeodomain protein 1                        | GO:0003677; GO:0045449             |
| Solyc11g010710.1 | AP2-like ethylene-responsive transcription factor At1g16060 (AHRD *- AP2L1_ARATH); contains Interpro domain(s) IPR001471 Pathogenesis-related transcriptional factor and ERF, DNA-binding | 2.31   | 9.10E-05 | Ap2-like ethylene-responsive transcription factor ail6   | GO:0003700; GO:0006355             |

|                  |                                                                                                                                                               |      |          |                                         |                                                                        |
|------------------|---------------------------------------------------------------------------------------------------------------------------------------------------------------|------|----------|-----------------------------------------|------------------------------------------------------------------------|
| Solyc04g074430.1 | Phi-1 protein (Fragment) (AHRD V1 *-*- contains Interpro domain(s) IPR006766 Phosphate-induced protein 1 conserved region                                     | 2.19 | 9.80E-05 | Protein exordium                        |                                                                        |
| Solyc04g077980.1 | Zinc-finger protein (AHRD V1 ***- Q40899_PETHY); Interpro domain(s) IPR007087 Zinc finger, C2H2-type                                                          | 2.19 | 9.14E-04 | Zinc finger protein zat10               | GO:0005622; GO:0008270                                                 |
| Solyc08g083050.1 | Unknown Protein (AHRD V1)                                                                                                                                     | 2.17 | 1.81E-03 | Unknown Protein                         |                                                                        |
| Solyc08g066890.2 | Unknown Protein (AHRD V1)                                                                                                                                     | 2.07 | 4.04E-04 | Bark storage protein a                  |                                                                        |
| Solyc01g066160.1 | Unknown Protein (AHRD V1)                                                                                                                                     | 2.05 | 5.38E-04 | Unknown Protein                         |                                                                        |
| Solyc02g089170.2 | Alpha-1 4-glucan-protein synthase (AHRD V1 **-* contains Interpro domain(s) IPR004901 Alpha-1,4-glucan-protein synthase, UDP-forming                          | 2.04 | 3.98E-04 | Alpha- -glucan-protein synthase         | GO:0005794; GO:0007047; GO:0009505; GO:0016758; GO:0030054; GO:0030244 |
| Solyc01g007080.2 | Aluminum-activated malate transporter (Fragment) (AHRD V1 Q071L4_AVESA); contains Interpro domain(s) IPR006214 Uncharacterised protein family UPF0005         | 2.02 | 1.51E-03 | Aluminum-activated malate transporter 8 | GO:0010044                                                             |
| Solyc10g055740.1 | Lysine/histidine transporter (AHRD V1 ***- B9GQ40_POPTR); Interpro domain(s) IPR013057 Amino acid transporter, transmembrane                                  | 1.98 | 2.59E-03 | Lysine histidine transporter-           |                                                                        |
| Solyc05g046020.2 | Peroxidase (AHRD V1 **** Q07446_SOLLIC); contains domain(s) IPR002016 Haem peroxidase, plant/fungal/bacterial                                                 | 1.97 | 3.32E-08 | Peroxidase 3                            | GO:0005515; GO:0055114; GO:0004601                                     |
| Solyc03g020030.2 | Proteinase inhibitor II (AHRD V1 ***- contains Interpro domain(s) IPR003465 Proteinase inhibitor I20, Pin2                                                    | 1.96 | 1.89E-05 | Proteinase inhibitor type-2 cevi57      | GO:0004867                                                             |
| Solyc04g074900.2 | 40S ribosomal protein S21 (AHRD V1 D7M5J1_ARALY); contains Interpro domain(s) IPR001931 Ribosomal protein S21e                                                | 1.96 | 2.35E-03 | 40s ribosomal protein s21               | GO:0003735; GO:0005622; GO:0005840; GO:0006412                         |
| Solyc04g049920.2 | RNA binding protein-like (AHRD V1 **-- contains Interpro domain(s) IPR000504 RNA recognition motif, RNP-1                                                     | 1.94 | 5.51E-04 | Rna-binding protein 38                  | GO:0000166                                                             |
| Solyc02g089620.2 | Proline dehydrogenase (AHRD V1 **** A1E289_ACTDE); Interpro domain(s) IPR015659 Proline oxidase                                                               | 1.88 | 4.36E-09 | Proline dehydrogenase mitochondrial     | GO:0004657; GO:0005515; GO:0055114                                     |
| Solyc08g082630.2 | Auxin response factor 9 (AHRD V1 D7R605_SOLLIC); contains Interpro domain(s) IPR010525 Auxin response factor                                                  | 1.88 | 4.96E-10 | Auxin response factor 9                 | GO:0003677; GO:0005634; GO:0009725; GO:0045449                         |
| Solyc08g068600.2 | Decarboxylase family protein (AHRD V1 ***- contains Interpro domain(s) IPR002129 Pyridoxal phosphate-dependent decarboxylase                                  | 1.84 | 1.99E-04 | Histidine decarboxylase                 | GO:0003824; GO:0030170                                                 |
| Solyc11g013220.1 | Os04g0690100 protein (Fragment) (AHRD V1 ***-                                                                                                                 | 1.84 | 3.01E-05 | C2h2-like zinc finger protein           | GO:0005622; GO:0008270                                                 |
| Solyc04g074450.1 | Phi-1 protein (Fragment) (AHRD V1 ***- contains Interpro domain(s) IPR006766 Phosphate-induced protein 1 conserved region                                     | 1.82 | 1.42E-04 | Protein exordium                        |                                                                        |
| Solyc06g007180.2 | Asparagine synthase (Glutamine-hydrolyzing) (AHRD V1 **** contains Interpro domain(s) IPR006426 Asparagine synthase, glutamine-hydrolyzing                    | 1.81 | 2.30E-03 | Asparagine synthetase                   | GO:0004066; GO:0006529; GO:0042803                                     |
| Solyc02g069280.2 | ARGONAUTE 1 (AHRD V1 ***- D6RUV9_TOBAC); Interpro domain(s) IPR003165 Stem cell self-renewal protein Piwi                                                     | 1.78 | 1.98E-03 | Protein argonaute 2                     | GO:0003676                                                             |
| Solyc06g062540.2 | Phosphatase (AHRD V1 ***- D2V497_NAEGR); contains domain(s) IPR016965 Pyridoxal phosphate phosphatase, PHOSPHO2                                               | 1.77 | 5.22E-04 | Inorganic pyrophosphatase 1             | GO:0016791                                                             |
| Solyc03g005910.2 | GDSL esterase/lipase At1g29670 (AHRD V1 ***- contains Interpro domain(s) IPR001087 Lipase, GDSL                                                               | 1.73 | 4.66E-05 | Gdsl esterase lipase                    | GO:0006629; GO:0016788                                                 |
| Solyc07g041640.2 | Growth-regulating factor 1 (AHRD V1 *--- contains Interpro domain(s) IPR014977 WRC                                                                            | 1.7  | 1.10E-04 | Growth-regulating factor 1-             | GO:0005634                                                             |
| Solyc08g066880.2 | 5'&apost-methylthioadenosine/S-adenosylhomocysteine nucleosidase (AHRD V1 *-*- D6E0Z8_9FIRM); Interpro domain(s) IPR018017 Nucleoside phosphorylase, family 1 | 1.69 | 1.49E-03 | Bark storage protein a-                 | GO:0009116                                                             |
| Solyc00g206460.1 | Os06g0220000 protein (Fragment) (AHRD V1 ***- contains Interpro domain(s) IPR006766 Phosphate-induced protein 1 conserved region                              | 1.68 | 3.34E-04 | Unknown Protein                         |                                                                        |
| Solyc04g074340.2 | UDP-glucuronosyltransferase (AHRD V1 **-* Q5UB81_ARATH); contains domain(s) IPR002213 UDP-glucuronosyl/UDP-glucosyltransferase                                | 1.68 | 1.96E-03 | 7-deoxyloganetin glucosyltransferase-   | GO:0008152; GO:0016758                                                 |
| Solyc01g103500.2 | Unknown Protein (AHRD V1)                                                                                                                                     | 1.67 | 5.80E-04 | Extended synaptotagmin-3                |                                                                        |
| Solyc06g053870.2 | Fatty acid elongase 3-ketoacyl-CoA synthase (AHRD **** Q6DUV6_BRANA); contains Interpro domain(s) IPR012392 Very-long-chain 3-ketoacyl-CoA synthase           | 1.66 | 1.25E-06 | 3-ketoacyl- synthase 19                 | GO:0003824; GO:0008152                                                 |
| Solyc11g042880.1 | Harpin-induced protein (AHRD V1 **-- B6TDG9_MAIZE)                                                                                                            | 1.66 | 3.28E-05 | Unknown protein                         |                                                                        |
| Solyc03g115120.1 | Chaperone protein dnaJ (AHRD V1 ***- contains Interpro domain(s) IPR015609 Molecular chaperone, heat shock protein, Hsp40, DnaJ                               | 1.65 | 1.72E-07 | Dnaj homolog subfamily c member 21      | GO:0031072                                                             |

|                  |                                                                                                                                                             |      |          |                                                            |                                    |
|------------------|-------------------------------------------------------------------------------------------------------------------------------------------------------------|------|----------|------------------------------------------------------------|------------------------------------|
| Solyc08g074620.1 | Polyphenol oxidase (AHRD V1 ***- Q41428_SOLTU); Interpro domain(s) IPR016213 Polyphenol oxidase, plant                                                      | 1.65 | 8.78E-16 | Polyphenol oxidase                                         | GO:0004097; GO:0055114             |
| Solyc02g030460.2 | Sh4 homologue protein (AHRD V1 *-*- contains Interpro domain(s) IPR017877 MYB-like                                                                          | 1.64 | 4.53E-04 | Methyl- -binding protein 2-like isoform                    | GO:0003700                         |
| Solyc07g055180.2 | Receptor protein kinase-like protein (AHRD V1 Q9LJU5_ARATH); contains Interpro domain(s) IPR002290 Serine/threonine protein kinase                          | 1.61 | 8.12E-05 | Serine threonine-protein kinase cdl1                       | GO:0004672; GO:0005524; GO:0006468 |
| Solyc10g007800.2 | Meiosis 5 (AHRD V1 *-*- B6T5X0_MAIZE)                                                                                                                       | 1.6  | 9.49E-04 | Protodermal factor 1                                       |                                    |
| Solyc04g078460.2 | N(4)-(Beta-N-acetylglucosaminy)-L-asparaginase (AHRD V1 **** ASPG_ELIMR); contains domain(s) IPR000246 Peptidase T2, asparaginase 2                         | 1.58 | 7.24E-04 | Probable isoaspartyl peptidase I-asparaginase 2            | GO:0016787                         |
| Solyc10g087030.1 | cytochrome P450                                                                                                                                             | 1.58 | 3.15E-04 | Premnaspirodiene oxygenase                                 | n/a                                |
| Solyc00g138060.2 | 2-oxoglutarate-dependent dioxygenase (AHRD V1 **** B9GL08_POPTR); Interpro domain(s) IPR005123 Oxoglutarate and iron-dependent oxygenase                    | 1.56 | 9.87E-04 | Unknown Protein                                            | GO:0016491                         |
| Solyc04g050570.2 | GDSL esterase/lipase At5g33370 (AHRD V1 ***- contains Interpro domain(s) IPR001087 Lipase, GDSL                                                             | 1.56 | 9.79E-08 | Gdsl esterase lipase                                       | GO:0006629; GO:0016788             |
| Solyc08g083240.2 | Calmodulin-binding protein family-like (AHRD V1 **-* contains Interpro domain(s) IPR000048 IQ calmodulin-binding region                                     | 1.56 | 5.76E-08 | Protein iq-domain 1                                        | GO:0005516                         |
| Solyc01g007010.2 | U-box domain-containing protein (AHRD V1 ***- contains Interpro domain(s) IPR003613 U box domain                                                            | 1.55 | 2.05E-03 | E3 ubiquitin-protein ligase pub22                          | GO:0005488                         |
| Solyc10g048190.1 | Ubiquinol-Cytochrome c reductase iron-sulfur subunit (AHRD **-- B6B5V9_9RHOB); contains Interpro domain(s) IPR002740 Uncharacterised protein family UPF0310 | 1.55 | 1.46E-04 | Thymocyte nuclear protein 1                                |                                    |
| Solyc10g006660.2 | Calcium-binding EF hand family protein (Fragment) V1 **-- D7MEH5_ARALY); contains Interpro domain(s) IPR011992 EF-Hand type                                 | 1.54 | 2.47E-03 | Calcium-binding protein pbp1                               | GO:0005509                         |
| Solyc01g007200.2 | Unknown Protein (AHRD V1)                                                                                                                                   | 1.53 | 3.92E-04 | Unknown protein                                            |                                    |
| Solyc11g011310.1 | Rhamnogalacturonate lyase (AHRD V1 ***- A3XLZ2_LEEBM); Interpro domain(s) IPR010325 Rhamnogalacturonate lyase                                               | 1.53 | 8.24E-05 | Probable rhamnogalacturonate lyase b                       | GO:0030246                         |
| Solyc03g122360.2 | Cytochrome P450                                                                                                                                             | 1.51 | 1.29E-04 | Cytochrome p450 71a1                                       | n/a                                |
| Solyc04g024840.2 | GDSL esterase/lipase 1 (AHRD V1 **** contains Interpro domain(s) IPR001087 Lipase, GDSL                                                                     | 1.51 | 1.25E-03 | Unknown Protein                                            | GO:0006629; GO:0016788             |
| Solyc10g074440.1 | Endochitinase (Chitinase) (AHRD V1 **** Q43184_SOLTU); Interpro domain(s) IPR016283 Glycoside hydrolase, family 19                                          | 1.51 | 7.74E-10 | Endochitinase (Chitinase)                                  | GO:0008061                         |
| Solyc01g089910.2 | Flotillin domain protein (AHRD V1 ***- contains Interpro domain(s) IPR001107 Band 7 protein                                                                 | 1.5  | 2.65E-03 | Flotillin-like protein 6                                   |                                    |
| Solyc01g106910.2 | Unknown Protein (AHRD V1)                                                                                                                                   | 1.49 | 1.73E-05 | Unknown protein                                            |                                    |
| Solyc07g055750.2 | Strictosidine synthase-like protein (AHRD V1 ***- contains Interpro domain(s) IPR004141 Strictosidine synthase                                              | 1.49 | 1.15E-03 | Strictosidine synthase 1                                   | GO:0004064; GO:0005515; GO:0009058 |
| Solyc02g033040.2 | F-box family protein (AHRD V1 ***- contains Interpro domain(s) IPR001810 Cyclin-like F-box                                                                  | 1.48 | 3.78E-04 | F-box kelch-repeat protein                                 |                                    |
| Solyc02g078850.1 | Unknown Protein (AHRD V1)                                                                                                                                   | 1.47 | 9.28E-08 | Shematin-like protein 2                                    |                                    |
| Solyc01g098620.2 | Unknown Protein (AHRD V1)                                                                                                                                   | 1.46 | 8.76E-04 | Unknown protein                                            |                                    |
| Solyc08g066220.2 | Decarboxylase family protein (AHRD V1 *-*- contains Interpro domain(s) IPR002129 Pyridoxal phosphate-dependent decarboxylase                                | 1.46 | 3.04E-04 | Histidine decarboxylase                                    | GO:0003824; GO:0030170             |
| Solyc04g009040.2 | Receptor like kinase, RLK                                                                                                                                   | 1.45 | 1.97E-04 | Probable Irr receptor-like serine threonine-protein kinase | GO:0005515; GO:0019199; GO:0006468 |
| Solyc03g034390.1 | Lipid transfer protein (AHRD V1 --*- contains Interpro domain(s) IPR013770 Plant lipid transfer protein and hydrophobic protein, helical                    | 1.44 | 1.67E-04 | Non-specific lipid-transfer protein 2                      | GO:0006869                         |
| Solyc04g081080.1 | Receptor like kinase, RLK                                                                                                                                   | 1.44 | 2.13E-04 | Probable Irr receptor-like serine threonine-protein kinase | GO:0004675; GO:0006468             |
| Solyc09g098010.2 | Cytochrome P450                                                                                                                                             | 1.44 | 2.26E-03 | Geraniol 8-hydroxylase                                     | GO:0004497; GO:0005506; GO:0020037 |
| Solyc09g072750.2 | Unknown Protein (AHRD V1)                                                                                                                                   | 1.43 | 7.32E-08 | Repetitive proline-rich cell wall protein 2                |                                    |

|                  |                                                                                                                                                             |      |          |                                                           |                                    |
|------------------|-------------------------------------------------------------------------------------------------------------------------------------------------------------|------|----------|-----------------------------------------------------------|------------------------------------|
| Solyc03g114560.2 | Strictosidine synthase family protein (AHRD V1 D7LVM7_ARALY); contains Interpro domain(s) IPR004141 Strictosidine synthase                                  | 1.42 | 1.27E-05 | Strictosidine synthase 3                                  | GO:0004064; GO:0005515; GO:0009058 |
| Solyc06g071640.2 | Alliinase (Fragment) (AHRD V1 ***- Q94EJ8_ALLFI); Interpro domain(s) IPR006948 Allinase, C-terminal                                                         | 1.42 | 6.09E-04 | Tryptophan aminotransferase-related protein 2             | GO:0016846                         |
| Solyc10g083170.1 | 2,5-dichloro-2,5-cyclohexadiene-1,4-diol dehydrogenase (AHRD V1 **** LINC_PSEPA); Interpro domain(s) IPR002347 Glucose/ribitol dehydrogenase                | 1.42 | 5.99E-05 | Secoisolariciresinol dehydrogenase                        | GO:0008152; GO:0016491             |
| Solyc03g007690.1 | ABC transporter G family member 8 V1 ***- AB8G_ARATH); contains Interpro domain(s) IPR013525 ABC-2 type transporter                                         | 1.41 | 7.95E-06 | Abc transporter g family member 8                         | GO:0005524; GO:0016887             |
| Solyc07g052980.2 | Xyloglucan endotransglucosylase/hydrolase 5 (AHRD V1 **** contains Interpro domain(s) IPR016455 Xyloglucan endotransglucosylase/hydrolase                   | 1.41 | 4.34E-05 | Xyloglucan endotransglucosylase hydrolase protein 9       | GO:0004553; GO:0005975             |
| Solyc09g082790.2 | DNA repair and recombination protein RAD51 V1 ***- A9CT16_ENTBH); contains Interpro domain(s) IPR011940 Meiotic recombinase Dmc1                            | 1.41 | 1.06E-05 | Meiotic recombination protein dmc1 homolog                | GO:0006259                         |
| Solyc12g013700.1 | Aluminum-induced protein-like protein (AHRD V1 ***-                                                                                                         | 1.41 | 1.55E-03 | Stem-specific protein tsjt1                               |                                    |
| Solyc04g077170.2 | EPIDERMAL PATTERNING FACTOR-like protein 2 (AHRD ***- EPFL2_ARATH)                                                                                          | 1.4  | 2.76E-05 | Epidermal patterning factor-like protein 2                |                                    |
| Solyc05g005670.1 | U-box domain-containing protein (AHRD V1 *--- contains Interpro domain(s) IPR011989 Armadillo-like helical                                                  | 1.4  | 1.89E-03 | U-box domain-containing protein 19                        | GO:0005488                         |
| Solyc01g066640.2 | Os04g0405500 protein (Fragment) (AHRD V1 *-*                                                                                                                | 1.38 | 6.92E-06 | Uncharacterized serine-rich                               |                                    |
| Solyc01g079980.2 | Xylanase inhibitor (Fragment) (AHRD V1 ***- contains Interpro domain(s) IPR001461 Peptidase A1                                                              | 1.38 | 2.85E-04 | Basic 7s globulin                                         | GO:0004190; GO:0006508             |
| Solyc06g061230.2 | Unknown Protein (AHRD V1); contains Interpro IPR009632 Putative metalloproteinase inhibitor                                                                 | 1.38 | 5.92E-05 | Metalloproteinase inhibitor                               |                                    |
| Solyc06g072310.2 | Homeobox-leucine zipper protein PROTODERMAL FACTOR 2 V1 **** PDF2_ARATH); contains Interpro domain(s) IPR002913 Lipid-binding START                         | 1.38 | 2.08E-06 | Homeobox-leucine zipper protein hdg11                     | GO:0003677; GO:0045449             |
| Solyc11g072980.1 | 3-ketoacyl-CoA synthase 6 (AHRD V1 ***- contains Interpro domain(s) IPR012392 Very-long-chain 3-ketoacyl-CoA synthase                                       | 1.38 | 2.44E-05 | 3-ketoacyl- synthase 3                                    | GO:0003824; GO:0008152             |
| Solyc07g056460.2 | Glutathione S-transferase-like protein (AHRD V1 **** contains Interpro domain(s) IPR004046 Glutathione S-transferase, C-terminal                            | 1.37 | 4.28E-04 | lactoperoxidase                                           | GO:0004364                         |
| Solyc03g033350.2 | Aspartyl protease family protein (AHRD V1 D7LTT7_ARALY)                                                                                                     | 1.36 | 2.32E-03 | Aspartic proteinase- protein 1                            |                                    |
| Solyc04g071030.1 | U-box domain-containing protein (AHRD V1 ***- contains Interpro domain(s) IPR003613 U box domain                                                            | 1.36 | 1.17E-04 | U-box domain-containing protein 28                        | GO:0005488                         |
| Solyc01g057320.1 | Kinesin-like protein (AHRD V1 ***- Q75LL2_ORYSJ); Interpro domain(s) IPR001752 Kinesin, motor region                                                        | 1.35 | 5.92E-05 | Phragmoplast orienting kinesin-1                          | GO:0003777; GO:0005524; GO:0007018 |
| Solyc01g111350.2 | Nodulin family protein (AHRD V1 ***- contains Interpro domain(s) IPR010658 Nodulin-like                                                                     | 1.35 | 2.50E-04 | Probable transporter mch1                                 |                                    |
| Solyc04g077140.2 | Unknown Protein (AHRD V1); contains Interpro IPR010410 Protein of unknown function DUF1005                                                                  | 1.34 | 4.08E-08 | Formin-like protein 18                                    |                                    |
| Solyc09g064230.1 | Phosphoribosylanthranilate transferase (Fragment) (AHRD V1 *--- contains Interpro domain(s) IPR013583 Phosphoribosyltransferase C-terminal, plant           | 1.34 | 2.16E-03 | Multiple c2 and transmembrane domain-containing protein 1 |                                    |
| Solyc07g007860.1 | Proline rich protein (Fragment) (AHRD V1 P93274_MALDO); contains Interpro domain(s) IPR013770 Plant lipid transfer protein and hydrophobic protein, helical | 1.32 | 2.68E-06 | Kda proline-rich                                          | GO:0006869                         |
| Solyc07g056400.1 | Ribosomal protein S6 kinase alpha-6 (AHRD *-** KS6A6_HUMAN); contains Interpro domain(s) IPR002290 Serine/threonine protein kinase                          | 1.32 | 1.13E-03 | Serine threonine-protein kinase wag1                      | GO:0006468; GO:0004711             |
| Solyc09g006010.2 | Pathogenesis related protein PR-1 (AHRD V1 Q9SC15_SOLTU); contains Interpro domain(s) IPR001283 Allergen V5/Tpx-1 related                                   | 1.32 | 1.94E-08 | Pathogenesis-related leaf protein 4                       | GO:0005576                         |
| Solyc01g091010.2 | YABBY-like transcription factor CRABS CLAW-like protein V1 **-* Q6SRZ7_ANTMA); contains Interpro domain(s) IPR006780 YABBY protein                          | 1.31 | 3.90E-04 | Axial regulator yabby 1                                   | GO:0003677; GO:0005634             |
| Solyc09g072630.2 | LRR receptor-like serine/threonine-protein kinase, RLP                                                                                                      | 1.31 | 1.41E-03 | Piriformospora indica-insensitive protein 2               | GO:0005515                         |
| Solyc00g156980.2 | Choline dehydrogenase (AHRD V1 ***- A5L8M4_9GAMM); Interpro domain(s) IPR008671 Lycopene beta and epsilon cyclase                                           | 1.3  | 7.41E-08 | Unknown Protein                                           | GO:0016117; GO:0016705             |
| Solyc01g095750.2 | Long-chain-fatty-acid-CoA ligase (AHRD V1 **** B2WS80_ARAHA); Interpro domain(s) IPR000873 AMP-dependent synthetase and ligase                              | 1.3  | 2.13E-03 | Long chain acyl- synthetase 4                             | GO:0003824; GO:0008152             |
| Solyc03g113970.2 | Calmodulin binding protein (AHRD V1 **** contains Interpro domain(s) IPR012416 Calmodulin binding protein-like                                              | 1.3  | 2.29E-03 | Calmodulin binding isoform 2                              | GO:0005516                         |

|                  |                                                                                                                                                       |      |          |                                                                      |                                                            |
|------------------|-------------------------------------------------------------------------------------------------------------------------------------------------------|------|----------|----------------------------------------------------------------------|------------------------------------------------------------|
| Solyc09g005630.2 | Os03g0291800 protein (Fragment) (AHRD V1 *- contains Interpro domain(s) IPR004253 Protein of unknown function DUF231, plant                           | 1.3  | 1.36E-04 | Protein trichome birefringence                                       |                                                            |
| Solyc01g008600.2 | Zinc finger CCCH domain-containing protein 53 V1 ***- C3H53_ORYSJ); contains Interpro domain(s) IPR000571 Zinc finger, CCCH-type                      | 1.29 | 1.63E-06 | Zinc finger ccch domain-containing protein 53                        | GO:0000166                                                 |
| Solyc04g074310.2 | RNA-binding protein 68390-68829 (AHRD V1 *--- contains Interpro domain(s) IPR000504 RNA recognition motif, RNP-1                                      | 1.29 | 4.12E-06 | Rna-binding protein 38                                               | GO:0000166                                                 |
| Solyc05g051290.2 | High mobility group family (AHRD V1 B9H3A3_POPTR); contains Interpro domain(s) IPR017956 AT hook, DNA-binding, conserved site                         | 1.29 | 1.74E-06 | Hmg-y-related protein a                                              | GO:0000786; GO:0003677; GO:0005634; GO:0006334             |
| Solyc10g007830.1 | LRR receptor-like serine/threonine-protein kinase, RLP                                                                                                | 1.29 | 6.72E-04 | Protein too many mouths                                              | GO:0005515                                                 |
| Solyc12g019480.1 | Formin 3 (AHRD V1 *- D0QAN4_ARATH); Interpro domain(s) IPR015425 Actin-binding FH2                                                                    | 1.29 | 1.14E-04 | Formin-like protein 2                                                | GO:0030036                                                 |
| Solyc02g080330.2 | Cytochrome P450                                                                                                                                       | 1.28 | 7.14E-07 | Cytochrome p450 77a1                                                 | n/a                                                        |
| Solyc07g049430.2 | GDSL esterase/lipase At2g42990 (AHRD V1 ***- contains Interpro domain(s) IPR001087 Lipase, GDSL                                                       | 1.28 | 1.51E-05 | Gdsl esterase lipase                                                 | GO:0006629; GO:0016788                                     |
| Solyc07g054950.1 | Cyclin D2 (AHRD V1 **** Q71FH0_WHEAT); Interpro domain(s) IPR015451 Cyclin D                                                                          | 1.28 | 5.52E-06 | Cyclin-d6-1                                                          | GO:0005634; GO:0004693                                     |
| Solyc08g008020.1 | Phosphoribosylanthranilate transferase (Fragment) (AHRD V1 *--- contains Interpro domain(s) IPR013583 Phosphoribosyltransferase C-terminal, plant     | 1.28 | 5.92E-05 | Multiple c2 and transmembrane domain-containing protein 1            |                                                            |
| Solyc10g084290.1 | Interactor of constitutive active ROPs 3 V1 ***- ICR3_ARATH)                                                                                          | 1.27 | 1.86E-05 | Interactor of constitutive active rops chloroplastic-like isoform    |                                                            |
| Solyc12g056190.1 | Nuclear transport factor 2 (NTF2)-like protein V1 ***- Q67TV5_ORYSJ)                                                                                  | 1.27 | 1.45E-03 | Nuclear transport factor 2 family protein                            |                                                            |
| Solyc01g066910.2 | PVR3-like protein (AHRD V1 ***- B6TYX6_MAIZE); Interpro domain(s) IPR003612 Plant lipid transfer protein/seed storage/trypsin-alpha amylase inhibitor | 1.26 | 5.74E-08 | Lipid-transfer protein dir1                                          | GO:0006869                                                 |
| Solyc01g111740.2 | Bzip-like transcription factor-like (AHRD V1 ***- contains Interpro domain(s) IPR006867 Protein of unknown function DUF632                            | 1.26 | 1.98E-04 | Unknown Protein                                                      |                                                            |
| Solyc03g006800.1 | TCP family transcription factor (AHRD V1 A6MCZ2_9ORYZ); contains Interpro domain(s) IPR005333 Transcription factor, TCP                               | 1.26 | 2.73E-04 | Transcription factor tcp9                                            | GO:0003700                                                 |
| Solyc09g062970.1 | Unknown Protein (AHRD V1)                                                                                                                             | 1.26 | 4.43E-06 | Unknown Protein                                                      |                                                            |
| Solyc03g113910.2 | Gibberellin-regulated protein 2 (AHRD V1 *--- contains Interpro domain(s) IPR003854 Gibberellin regulated protein                                     | 1.25 | 1.14E-03 | Gibberellin-regulated protein 12                                     |                                                            |
| Solyc10g008440.2 | Expansin B1 (AHRD V1 ***- C8CC40_RAPSA); Interpro domain(s) IPR007117 Pollen allergen/expansin, C-terminal                                            | 1.25 | 3.86E-04 | Expansin beta isoform 1                                              | GO:0005576                                                 |
| Solyc03g116740.2 | Genomic DNA chromosome 3 P1 clone (AHRD V1 ***- Q9LVZ7_ARATH)                                                                                         | 1.24 | 9.90E-06 | Phosphatidylcholine:diacylglycerol cholinephosphotransferase 1       | GO:0004142                                                 |
| Solyc09g015770.2 | WRKY transcription factor 6 (AHRD V1 A7UGD3_SOLTU); contains Interpro domain(s) IPR003657 DNA-binding WRKY                                            | 1.24 | 1.88E-03 | Probable wrky transcription factor 70                                | GO:0003700; GO:0005634; GO:0043565; GO:0045449             |
| Solyc09g092720.2 | Unknown Protein (AHRD V1); contains Interpro IPR010800 Glycine rich                                                                                   | 1.24 | 6.09E-04 | Glycine-rich protein 3 short isoform                                 |                                                            |
| Solyc11g069960.1 | Receptor like kinase, RLK                                                                                                                             | 1.24 | 8.91E-10 | Probable leucine-rich repeat receptor-like protein kinase            | GO:0006468                                                 |
| Solyc01g111950.2 | Receptor-like kinase (AHRD V1 *- A7VM42_MARPO); Interpro domain(s) IPR002290 Serine/threonine protein kinase                                          | 1.23 | 5.09E-04 | Receptor-like cytosolic serine threonine-protein kinase rbk1 isoform | GO:0004674; GO:0006468                                     |
| Solyc10g080430.1 | Phosphoribosylanthranilate transferase (Fragment) (AHRD V1 *--- contains Interpro domain(s) IPR013583 Phosphoribosyltransferase C-terminal, plant     | 1.23 | 2.42E-03 | Multiple c2 and transmembrane domain-containing protein 1            | GO:0005509                                                 |
| Solyc12g010800.1 | BZIP transcription factor family protein (AHRD ***- D7LW03_ARALY); contains Interpro domain(s) IPR011700 Basic leucine zipper                         | 1.23 | 1.97E-05 | Basic leucine zipper 61                                              | GO:0003700; GO:0005634; GO:0006355; GO:0043565; GO:0046983 |
| Solyc02g087510.2 | Ribosomal protein S6 kinase alpha-2 (AHRD *** KS6A2_HUMAN); contains Interpro domain(s) IPR002290 Serine/threonine protein kinase                     | 1.22 | 1.79E-03 | Serine threonine-protein kinase d6pk12                               | GO:0006468; GO:0004711                                     |
| Solyc03g121600.2 | Choline dehydrogenase (AHRD V1 ***- B0WJG6_CULQU); Interpro domain(s) IPR012132 Glucose-methanol-choline oxidoreductase                               | 1.22 | 8.97E-06 | Protein hothead-like isoform                                         | GO:0016614                                                 |
| Solyc04g005600.1 | MYB transcription factor (AHRD V1 *--- contains Interpro domain(s) IPR015495 Myb transcription factor                                                 | 1.22 | 4.81E-05 | Protein odorant1                                                     | GO:0045449                                                 |



|                  |                                                                                                                                                     |      |          |                                                              |                                                |
|------------------|-----------------------------------------------------------------------------------------------------------------------------------------------------|------|----------|--------------------------------------------------------------|------------------------------------------------|
| Solyc02g085490.1 | Os12g0581300 protein (Fragment) (AHRD V1 *-*- contains Interpro domain(s) IPR006873 Protein of unknown function DUF620                              | 1.21 | 5.79E-05 | Spindle assembly abnormal protein 6                          |                                                |
| Solyc06g060860.1 | Unknown Protein (AHRD V1)                                                                                                                           | 1.21 | 1.73E-03 | Atp-dependent caseinolytic protease crotonase family protein |                                                |
| Solyc08g080590.2 | Osmotin 81 (Fragment) (AHRD V1 **-- contains Interpro domain(s) IPR001938 Thaumatin, pathogenesis-related                                           | 1.21 | 6.78E-06 | Osmotin-like protein                                         |                                                |
| Solyc09g098490.2 | Epsin 2 (AHRD V1 *-*- Q5NCM7_MOUSE); Interpro domain(s) IPR001026 Epsin, N-terminal                                                                 | 1.21 | 4.50E-05 | Clathrin interactor epsin 2 isoform                          | GO:0005515; GO:0005488                         |
| Solyc02g080610.2 | Ankyrin repeat domain-containing protein 13C-A (AHRD **** C0H9Z7_SALSA); contains Interpro domain(s) IPR002110 Ankyrin                              | 1.2  | 3.85E-05 | Ankyrin repeat domain-containing protein 13c                 | GO:0030165                                     |
| Solyc02g090960.1 | Rapid alkalization factor 3 (AHRD V1 Q6TF27_SOLCH); contains Interpro domain(s) IPR008801 Rapid Alkalinization Factor                               | 1.2  | 2.75E-06 | Protein ralf                                                 | GO:0004871                                     |
| Solyc06g065340.1 | Unknown Protein (AHRD V1)                                                                                                                           | 1.2  | 2.31E-05 | Unknown Protein                                              |                                                |
| Solyc06g072290.2 | Protein Kinase interacting protein (AHRD V1 B6TI58_MAIZE); contains Interpro domain(s) IPR011684 KIP1-like                                          | 1.2  | 1.56E-04 | Golgin candidate 5                                           |                                                |
| Solyc07g056360.1 | Unknown Protein (AHRD V1)                                                                                                                           | 1.2  | 1.42E-03 | Transcription factor par1                                    |                                                |
| Solyc10g008930.1 | Glutaredoxin (AHRD V1 ***- B9H2P7_POPTR); contains domain(s) IPR011905 Glutaredoxin-like, plant II                                                  | 1.2  | 5.20E-05 | Glutaredoxin-c9                                              | GO:0045454; GO:0005515                         |
| Solyc10g080870.2 | Cytochrome P450                                                                                                                                     | 1.2  | 1.00E-05 | Cytochrome p450 86b1                                         | GO:0004497; GO:0005506; GO:0020037             |
| Solyc12g043030.1 | Sulfate transporter (AHRD V1 ***- A1YKF8_BRASY)                                                                                                     | 1.2  | 5.21E-04 | Probable sulfate transporter                                 | GO:0008271; GO:0008272; GO:0016020             |
| Solyc01g097110.1 | Fanconi anemia group D2 protein (AHRD *-*- FACD2_HUMAN)                                                                                             | 1.19 | 9.49E-05 | Fanconi anemia group d2 protein homolog                      |                                                |
| Solyc04g063390.2 | Chaperone protein dnaJ 10 (AHRD V1 B4G111_MAIZE); contains Interpro domain(s) IPR003095 Heat shock protein DnaJ                                     | 1.19 | 1.06E-05 | Chaperone protein dnaJ 10                                    | GO:0031072                                     |
| Solyc06g007890.2 | Gibberellin regulated protein (AHRD V1 **-- contains Interpro domain(s) IPR003854 Gibberellin regulated protein                                     | 1.19 | 1.38E-04 | Gibberellin-regulated protein 5                              | GO:0005515                                     |
| Solyc08g061910.2 | Unknown Protein (AHRD V1)                                                                                                                           | 1.19 | 1.08E-05 | Trihelix transcription factor gt-2                           |                                                |
| Solyc01g107730.2 | Cyclin (AHRD V1 ***- Q1XGF1_TOBAC); contains domain(s) IPR006671 Cyclin, N-terminal                                                                 | 1.18 | 2.84E-04 | D-type cyclin family 3 subgroup 2                            | GO:0005634; GO:0005516; GO:0046982             |
| Solyc09g010960.2 | WRKY transcription factor 17 (AHRD V1 Q7E0X2_ORYSJ); contains Interpro domain(s) IPR003657 DNA-binding WRKY                                         | 1.18 | 2.02E-03 | Probable wrky transcription factor 49                        | GO:0003700; GO:0005634; GO:0043565; GO:0045449 |
| Solyc01g089850.2 | Cyclin-dependent protein kinase regulator Pho80 (AHRD **** B6QI37_PENMQ); contains Interpro domain(s) IPR012389 Negative regulatory factor PREG     | 1.17 | 6.56E-05 | Cyclin-u4-1                                                  | GO:0005515; GO:0016538                         |
| Solyc02g078400.2 | Allantoinase (AHRD V1 **** Q6S4R9_ROBPS); contains domain(s) IPR017593 Allantoinase                                                                 | 1.17 | 4.83E-07 | Allantoinase                                                 | GO:0016810                                     |
| Solyc08g075240.2 | Glucose-methanol-choline oxidoreductase (AHRD V1 ***- D6TF66_9CHLR); Interpro domain(s) IPR012400 Long-chain fatty alcohol dehydrogenase            | 1.17 | 4.75E-05 | Long-chain-alcohol oxidase fao4a                             | GO:0009055; GO:0046577; GO:0050660             |
| Solyc12g087940.1 | Aspartic proteinase nepenthesin-1 (AHRD V1 **-- contains Interpro domain(s) IPR001461 Peptidase A1                                                  | 1.17 | 3.50E-05 | Aspartic proteinase nepenthesin-1                            | GO:0004190; GO:0006508                         |
| Solyc01g091230.2 | Receptor like kinase, RLK                                                                                                                           | 1.16 | 5.17E-05 | Lrr receptor-like serine threonine-protein kinase gso1       | GO:0005515; GO:0004675                         |
| Solyc03g115870.2 | Thioredoxin 2 (AHRD V1 ***- Q5ZF47_PLAMJ); Interpro domain(s) IPR015467 Thioredoxin, core                                                           | 1.16 | 1.23E-03 | Thioredoxin- chloroplastic                                   | GO:0045454                                     |
| Solyc04g074410.1 | Os06g0220000 protein (Fragment) (AHRD V1 ***- contains Interpro domain(s) IPR006766 Phosphate-induced protein 1 conserved region                    | 1.16 | 3.16E-04 | Protein exordium                                             |                                                |
| Solyc06g065970.1 | Cortical cell-delineating protein (AHRD V1 **-- contains Interpro domain(s) IPR013770 Plant lipid transfer protein and hydrophobic protein, helical | 1.16 | 1.83E-04 | 14 kda proline-rich                                          | GO:0006869                                     |
| Solyc08g081790.1 | Dirigent protein (AHRD V1 ***- Q9SDR7_FORIN); Interpro domain(s) IPR004265 Plant disease resistance response protein                                | 1.16 | 2.71E-03 | Disease resistance response protein 206                      |                                                |
| Solyc01g068140.2 | 10-deacetylbaaccatin III-10-O-acetyl transferase-like (AHRD V1 **-* contains Interpro domain(s) IPR003480 Transferase                               | 1.15 | 1.19E-04 | 3 -n-debenzoyl-2 -deoxytaxol n-benzoyltransferase            | GO:0016747                                     |

|                  |                                                                                                                                                                                           |      |          |                                                                 |                                                            |
|------------------|-------------------------------------------------------------------------------------------------------------------------------------------------------------------------------------------|------|----------|-----------------------------------------------------------------|------------------------------------------------------------|
| Solyc03g093610.1 | Ethylene responsive transcription factor 1b (AHRD **** C0J9I8_9ROSA); contains Interpro domain(s) IPR001471 Pathogenesis-related transcriptional factor and ERF, DNA-binding              | 1.15 | 4.39E-04 | Ethylene-responsive transcription factor 1                      | GO:0003700; GO:0006355                                     |
| Solyc03g118370.2 | Serine carboxypeptidase K10B2.2 (AHRD V1 **** contains Interpro domain(s) IPR001563 Peptidase S10, serine carboxypeptidase                                                                | 1.15 | 6.21E-08 | Serine carboxypeptidase                                         | GO:0004185; GO:0006508                                     |
| Solyc04g013200.1 | Unknown Protein (AHRD V1)                                                                                                                                                                 | 1.15 | 2.45E-04 | Unknown Protein                                                 |                                                            |
| Solyc06g007170.2 | Os06g0207500 protein (Fragment) (AHRD V1 **-- contains Interpro domain(s) IPR004253 Protein of unknown function DUF231, plant                                                             | 1.15 | 1.37E-04 | Protein pmr5                                                    |                                                            |
| Solyc07g064990.2 | S-adenosyl-L-methionine salicylic acid carboxyl methyltransferase-like protein V1 **** Q8LAR1_ARATH); contains Interpro domain(s) IPR005299 SAM dependent carboxyl methyltransferase      | 1.15 | 6.48E-05 | Indole-3-acetate o-methyltransferase 1                          | GO:0008168                                                 |
| Solyc08g078940.1 | Cortical cell-delineating protein (AHRD V1 **-- contains Interpro domain(s) IPR013770 Plant lipid transfer protein and hydrophobic protein, helical                                       | 1.15 | 4.85E-07 | 14 kda proline-rich                                             | GO:0006869                                                 |
| Solyc11g011000.1 | Cysteine-rich repeat secretory protein 60 (AHRD ***- CRR60_ARATH); contains Interpro domain(s) IPR002902 Protein of unknown function DUF26                                                | 1.15 | 4.92E-04 | Cysteine-rich repeat secretory protein 60                       |                                                            |
| Solyc01g088400.2 | CER1 (AHRD V1 **-- B6TFH3_MAIZE); contains domain(s) IPR006694 Fatty acid hydroxylase                                                                                                     | 1.14 | 1.18E-03 | Protein eceriferum 1                                            | GO:0005506; GO:0005783; GO:0006633; GO:0016491; GO:0055114 |
| Solyc06g008770.1 | Cc-nbs-lrr, resistance protein                                                                                                                                                            | 1.14 | 2.45E-03 | Nbs-lrr resistance protein                                      | GO:0006952                                                 |
| Solyc07g018290.2 | AP2-like ethylene-responsive transcription factor At1g16060 (AHRD *- AP2L1_ARATH); contains Interpro domain(s) IPR001471 Pathogenesis-related transcriptional factor and ERF, DNA-binding | 1.14 | 4.19E-05 | Ap2-like ethylene-responsive transcription factor ail5          | GO:0003700; GO:0006355                                     |
| Solyc10g055730.1 | N-hydroxycinnamoyl/benzoyltransferase 4 (AHRD V1 ***- Q00M86_SOYBN); Interpro domain(s) IPR003480 Transferase                                                                             | 1.14 | 1.00E-03 | Uncharacterized acetyltransferase                               | GO:0016747                                                 |
| Solyc02g071870.2 | Receptor like kinase, RLK                                                                                                                                                                 | 1.13 | 8.14E-04 | Probable lrr receptor-like serine threonine-protein kinase rfk1 | GO:0004702; GO:0005515                                     |
| Solyc03g118770.2 | WUSCHEL-related homeobox-containing protein 4 (AHRD V1 C0LAL8_9MAGN); contains Interpro domain(s) IPR001356 Homeobox                                                                      | 1.13 | 1.23E-03 | Wuschel-related homeobox 1                                      | GO:0006355                                                 |
| Solyc05g053550.2 | Chalcone synthase (AHRD V1 ***- C5IWS6_NICAL); Interpro domain(s) IPR011141 Polyketide synthase, type III                                                                                 | 1.13 | 1.22E-05 | Chalcone synthase                                               | GO:0008415                                                 |
| Solyc06g084080.2 | Guanylate-binding family protein (AHRD V1 ***- contains Interpro domain(s) IPR015900 Guanylate-binding protein-like, C-terminal                                                           | 1.13 | 6.01E-04 | Guanylate-binding protein 4 isoform                             | GO:0003924; GO:0005525                                     |
| Solyc11g005710.1 | WD-40 repeat family protein (AHRD V1 D7MSZ0_ARALY); contains Interpro domain(s) IPR020472 G-protein beta WD-40 repeat, region                                                             | 1.13 | 1.38E-04 | Wd repeat-containing protein 44                                 |                                                            |
| Solyc02g072490.2 | Os01g0841200 protein (Fragment) (AHRD V1 *--- contains Interpro domain(s) IPR004348 Protein of unknown function DUF246, plant                                                             | 1.12 | 1.85E-03 | O-fucosyltransferase family protein isoform 1                   |                                                            |
| Solyc09g061930.2 | Receptor like kinase, RLK                                                                                                                                                                 | 1.12 | 4.05E-05 | Kinase-like protein tmkl1                                       | GO:0005515; GO:0004674                                     |
| Solyc10g005400.2 | Inositol oxygenase (AHRD V1 **** B9XK04_9BACT); Interpro domain(s) IPR007828 Protein of unknown function DUF706                                                                           | 1.12 | 8.97E-04 | Inositol oxygenase 1                                            | GO:0005506; GO:0005737; GO:0019310; GO:0050113; GO:0055114 |
| Solyc03g115200.2 | Glucan endo-1 3-beta-glucosidase 1 (AHRD V1 B6TW10_MAIZE); contains Interpro domain(s) IPR012946 X8                                                                                       | 1.11 | 5.93E-04 | Plasmodesmata callose-binding protein 3                         |                                                            |
| Solyc03g117560.2 | Blue copper-like protein (AHRD V1 **-- contains Interpro domain(s) IPR003245 Plastocyanin-like                                                                                            | 1.11 | 8.39E-05 | Lamin-like protein                                              | GO:0009055; GO:0005515                                     |
| Solyc06g005980.2 | Anthranilate synthase component I-1 (AHRD V1 B4F8P4_MAIZE); contains Interpro domain(s) IPR019999 Anthranilate synthase component I, C-terminal                                           | 1.11 | 1.67E-03 | Anthranilate synthase alpha subunit chloroplastic-like          | GO:0009058                                                 |
| Solyc06g060360.2 | Universal stress protein family protein (AHRD ***- A8IXG1_BRACM); contains Interpro domain(s) IPR006016 UspA                                                                              | 1.11 | 2.28E-04 | Adenine nucleotide alpha hydrolases-like superfamily protein    | GO:0006950                                                 |
| Solyc06g073560.2 | Isovaleryl-CoA dehydrogenase (AHRD V1 **** Q0MX57_BETVU); Interpro domain(s) IPR009100 Acyl-CoA dehydrogenase/oxidase, middle and N-terminal                                              | 1.11 | 1.04E-03 | Isovaleryl- mitochondrial                                       | GO:0003995                                                 |
| Solyc11g008830.1 | LOB domain protein (AHRD V1 *- *- contains Interpro domain(s) IPR004883 Lateral organ boundaries, LOB                                                                                     | 1.11 | 6.15E-04 | Lob domain-containing protein 6                                 |                                                            |
| Solyc02g079370.2 | Cyclin-D6-1 (AHRD V1 **** CCD61_ORYSJ); contains domain(s) IPR015451 Cyclin D                                                                                                             | 1.1  | 1.15E-04 | Cyclin-d6-1                                                     | n/a                                                        |
| Solyc04g082270.2 | CM0216.210.nc protein (AHRD V1 ***- B0BLH4_LOTJA); Interpro domain(s) IPR004320 Protein of unknown function DUF241, plant                                                                 | 1.1  | 8.61E-04 | Unknown Protein                                                 |                                                            |

|                  |                                                                                                                                                                                              |      |          |                                                              |                                                |
|------------------|----------------------------------------------------------------------------------------------------------------------------------------------------------------------------------------------|------|----------|--------------------------------------------------------------|------------------------------------------------|
| Solyc09g065660.2 | Heat stress transcription factor A3 (AHRD ***- D1M7W9_SOLLC); contains Interpro domain(s) IPR000232 Heat shock factor (HSF)-type, DNA-binding                                                | 1.1  | 1.46E-04 | Heat stress transcription factor a-7a                        | GO:0003700; GO:0005634; GO:0006355; GO:0043565 |
| Solyc12g015690.1 | Fasciclin-like arabinogalactan protein 10 (AHRD V1 A9XTL5_GOSHI); contains Interpro domain(s) IPR000782 FAS1 domain                                                                          | 1.1  | 7.66E-05 | Fasciclin-like arabinogalactan protein 1                     |                                                |
| Solyc01g006320.2 | Non-race specific disease resistance protein 1-like b (AHRD V1 ***- D2CFI3_COFAR); contains Interpro domain(s) IPR010847 Harpin-induced 1                                                    | 1.09 | 1.49E-04 | Protein ndr1                                                 | GO:0005515; GO:0004871                         |
| Solyc01g099650.2 | Formin 3 (AHRD V1 *- *- D0QAN4_ARATH); Interpro domain(s) IPR015425 Actin-binding FH2                                                                                                        | 1.09 | 2.10E-04 | Formin-like protein 11                                       | GO:0030036                                     |
| Solyc02g094190.2 | Nodulin family protein (AHRD V1 ***- contains Interpro domain(s) IPR010658 Nodulin-like                                                                                                      | 1.09 | 7.95E-04 | Probable transporter mch1                                    |                                                |
| Solyc04g077490.2 | AP2-like ethylene-responsive transcription factor At1g16060 (AHRD *- *- AP2L1_ARATH); contains Interpro domain(s) IPR001471 Pathogenesis-related transcriptional factor and ERF, DNA-binding | 1.09 | 3.79E-05 | Ap2-like ethylene-responsive transcription factor ant        | GO:0003700; GO:0006355                         |
| Solyc07g018070.2 | Heat shock protein-related (Fragment) (AHRD V1 B7ZEI4_ARATH); contains Interpro domain(s) IPR004176 Clp, N-terminal                                                                          | 1.09 | 1.78E-05 | Heat shock protein                                           | GO:0005515; GO:0019538                         |
| Solyc07g049370.2 | Glucan endo- 1 3-beta-glucosidase A6 (AHRD V1 B6TIF7_MAIZE); contains Interpro domain(s) IPR000490 Glycoside hydrolase, family 17                                                            | 1.09 | 3.85E-04 | Glucan endo- -beta-glucosidase 12                            | GO:0003824; GO:0005975; GO:0043169             |
| Solyc11g011300.1 | Rhamnogalacturonate lyase (AHRD V1 ***- A3XLZ2_LEEBM); Interpro domain(s) IPR010325 Rhamnogalacturonate lyase                                                                                | 1.09 | 1.94E-03 | Probable rhamnogalacturonate lyase b                         | GO:0030246                                     |
| Solyc03g123590.2 | Remorin family protein (AHRD V1 ***- contains Interpro domain(s) IPR005516 Remorin, C-terminal region                                                                                        | 1.08 | 9.40E-04 | Dna binding                                                  | GO:0003677                                     |
| Solyc04g080490.2 | Zinc finger-homeodomain protein 1 (Fragment) (AHRD *- - B0LK17_YUCFI); contains Interpro domain(s) IPR006456 ZF-HD homeobox protein Cys/His-rich dimerisation region                         | 1.08 | 4.79E-06 | Zinc-finger homeodomain protein 5                            | GO:0003677; GO:0045449                         |
| Solyc06g068550.2 | Aspartic proteinase nepenthesin-1 (AHRD V1 *- - contains Interpro domain(s) IPR001461 Peptidase A1                                                                                           | 1.08 | 3.38E-05 | Protein aspartic protease in guard cell 2                    | GO:0004190; GO:0006508                         |
| Solyc06g076220.2 | Expansin-1 (AHRD V1 ***- Q6RX69_PETHY); contains domain(s) IPR002963 Expansin                                                                                                                | 1.08 | 1.47E-05 | Expansin-a6                                                  | GO:0009664                                     |
| Solyc07g008010.2 | Myb transcription factor (AHRD V1 *- * contains Interpro domain(s) IPR015495 Myb transcription factor                                                                                        | 1.08 | 7.71E-04 | Transcription factor myb82                                   | GO:0003677; GO:0045449                         |
| Solyc07g055950.2 | Meiosis 5 (AHRD V1 *- *- B6T5X0_MAIZE)                                                                                                                                                       | 1.08 | 4.18E-04 | Protodermal factor 1                                         |                                                |
| Solyc01g079580.2 | DNAJ heat shock N-terminal domain-containing protein V1 ***- D7LGN0_ARALY); contains Interpro domain(s) IPR011990 Tetratricopeptide-like helical                                             | 1.07 | 1.07E-04 | Heat shock protein with tetratricopeptide repeat isoform 1   | GO:0031072                                     |
| Solyc01g107370.2 | Gibberellin-regulated family protein (AHRD V1 *- - contains Interpro domain(s) IPR003854 Gibberellin regulated protein                                                                       | 1.07 | 2.61E-04 | Gibberellin-regulated protein                                |                                                |
| Solyc03g026040.2 | Receptor like kinase, RLK                                                                                                                                                                    | 1.07 | 3.45E-04 | Leucine-rich repeat receptor protein kinase exs              | GO:0004675; GO:0006468                         |
| Solyc03g119990.2 | Hydrolase alpha/beta fold family protein (AHRD **** D7KX74_ARALY); contains Interpro domain(s) IPR000073 Alpha/beta hydrolase fold-1                                                         | 1.07 | 3.81E-04 | Unknown Protein                                              | GO:0016787                                     |
| Solyc04g078770.2 | Heat stress transcription factor (AHRD V1 D4QAU8_CARPA); contains Interpro domain(s) IPR000232 Heat shock factor (HSF)-type, DNA-binding                                                     | 1.07 | 7.96E-04 | Heat stress transcription factor b-4                         | GO:0003700; GO:0005634; GO:0006355; GO:0043565 |
| Solyc06g068880.2 | Serine carboxypeptidase 1 (AHRD V1 **** contains Interpro domain(s) IPR001563 Peptidase S10, serine carboxypeptidase                                                                         | 1.07 | 8.76E-06 | Unknown Protein                                              | GO:0004185; GO:0006508                         |
| Solyc10g045290.1 | Kinase interacting family protein (AHRD V1 D7KCB2_ARALY); contains Interpro domain(s) IPR011684 KIP1-like                                                                                    | 1.07 | 7.42E-04 | Intracellular protein transport protein us01                 |                                                |
| Solyc01g088380.1 | DNA helicase (AHRD V1 ***- A6ZT72_YEAS7); Interpro domain(s) IPR014808 DNA replication factor Dna2                                                                                           | 1.06 | 3.62E-05 | Dna replication atp-dependent helicase nuclease dna2 isoform | GO:0003677; GO:0004003; GO:0005524; GO:0006260 |
| Solyc01g100750.2 | Susceptibility homeodomain transcription factor (Fragment) (AHRD *- *- Q8SAA7_ORYSA); contains Interpro domain(s) IPR007493 Protein of unknown function DUF538                               | 1.06 | 8.90E-04 | Unknown Protein                                              | GO:0005515                                     |
| Solyc02g090480.2 | Peptidyl-prolyl cis-trans isomerase D (AHRD V1 PPID_RAT); contains Interpro domain(s) IPR002130 Peptidyl-prolyl cis-trans isomerase, cyclophilin-type                                        | 1.06 | 7.23E-04 | Peptidyl-prolyl cis-trans isomerase cyp40                    | GO:0003755; GO:0006457                         |
| Solyc03g006840.2 | Genomic DNA chromosome 5 P1 clone (AHRD V1 ***- Q9FIS0_ARATH)                                                                                                                                | 1.06 | 3.99E-05 | Protein longifolia 1                                         |                                                |
| Solyc03g121170.2 | GDSL esterase/lipase At5g22810 (AHRD V1 ***- contains Interpro domain(s) IPR001087 Lipase, GDSL                                                                                              | 1.06 | 1.08E-04 | Gdsl esterase lipase apg                                     | GO:0006629; GO:0004091                         |



|                  |                                                                                                                                                     |      |          |                                                                                     |                                                            |
|------------------|-----------------------------------------------------------------------------------------------------------------------------------------------------|------|----------|-------------------------------------------------------------------------------------|------------------------------------------------------------|
| Solyc11g072840.1 | Histone H4 (AHRD V1 ***- B6TOP4_MAIZE); Interpro domain(s) IPR001951 Histone H4                                                                     | 1.02 | 1.17E-04 | Histone h4                                                                          | GO:0000786; GO:0003677; GO:0005634; GO:0006334             |
| Solyc12g007160.1 | Protein ABIL1 (AHRD V1 *--- B6TCZ2_MAIZE)                                                                                                           | 1.02 | 1.81E-03 | Probable protein abil5                                                              |                                                            |
| Solyc05g009100.2 | Receptor like kinase, RLK                                                                                                                           | 1.01 | 4.23E-05 | Probable leucine-rich repeat receptor-like protein kinase                           | GO:0004672; GO:0005524; GO:0006468                         |
| Solyc07g054170.2 | Expansin B1 (AHRD V1 ***- C8CC40_RAPSA); Interpro domain(s) IPR007117 Pollen allergen/expansin, C-terminal                                          | 1.01 | 1.38E-03 | Expansin-b3                                                                         | GO:0005576                                                 |
| Solyc11g006250.1 | GDSL esterase/lipase At5g33370 (AHRD V1 ***- contains Interpro domain(s) IPR001087 Lipase, GDSL                                                     | 1.01 | 1.25E-03 | Gdsl esterase lipase                                                                | GO:0006629; GO:0016788                                     |
| Solyc11g068890.1 | NHL1 (Fragment) (AHRD V1 ***- B0LZK8_ARATH); Interpro domain(s) IPR010847 Harpin-induced 1                                                          | 1.01 | 4.81E-04 | Protein yls9                                                                        |                                                            |
| Solyc12g005020.1 | Ring H2 finger protein (AHRD V1 D9ZHD8_HYPPE); contains Interpro domain(s) IPR018957 Zinc finger, C3HC4 RING-type                                   | 1.01 | 1.72E-04 | Nep1-interacting 1                                                                  | GO:0005141; GO:0008270                                     |
| Solyc12g089050.1 | Wax synthase isoform 1 (AHRD V1 Q84XY9_VITVI)                                                                                                       | 1.01 | 1.03E-03 | Acyl- --sterol o-acyltransferase 1                                                  | GO:0005515; GO:0008415                                     |
| Solyc02g092420.2 | Os07g0587200 protein (Fragment) (AHRD V1 *--- contains Interpro domain(s) IPR013069 BTB/POZ                                                         | 1    | 1.01E-03 | Btb poz domain-containing protein                                                   | GO:0005515                                                 |
| Solyc03g083510.2 | LRR receptor-like serine/threonine-protein kinase, RLP                                                                                              | 1    | 6.66E-05 | Probable lrr receptor-like serine threonine-protein kinase                          | GO:0005515; GO:0004675                                     |
| Solyc03g097170.2 | Cinnamoyl-CoA reductase-like protein (AHRD V1 ***- contains Interpro domain(s) IPR016040 NAD(P)-binding domain                                      | 1    | 4.68E-04 | Cinnamoyl- reductase 1                                                              | GO:0003824; GO:0005488; GO:0008152                         |
| Solyc04g077510.2 | Growth regulating factor 1 (Fragment) (AHRD *--- A6MZS4_ORYSI); contains Interpro domain(s) IPR014977 WRC                                           | 1    | 5.25E-04 | Growth-regulating factor 1                                                          | GO:0005634; GO:0016563; GO:0005515                         |
| Solyc05g015840.2 | Squamosa promoter-binding protein (AHRD V1 ***- contains Interpro domain(s) IPR004333 Transcription factor, SBP-box                                 | 1    | 4.68E-05 | Squamosa promoter-binding-like protein 16                                           | GO:0003677; GO:0005634                                     |
| Solyc06g072660.2 | Dek protein (AHRD V1 *- B6SWA1_MAIZE); Interpro domain(s) IPR014876 DEK, C-terminal                                                                 | 1    | 1.10E-03 | Protein dek-like isoform                                                            |                                                            |
| Solyc10g008320.1 | Unknown Protein (AHRD V1)                                                                                                                           | 1    | 4.39E-05 | Unknown Protein                                                                     |                                                            |
| Solyc02g070540.2 | Os01g0611000 protein (Fragment) (AHRD V1 ***- contains Interpro domain(s) IPR006946 Protein of unknown function DUF642                              | 0.99 | 8.11E-05 | Unknown protein                                                                     |                                                            |
| Solyc02g072140.1 | UNE1-like protein (AHRD V1 ***- B2ZAQ7_GOSRA); Interpro domain(s) IPR006943 Protein of unknown function DUF641, plant                               | 0.99 | 6.06E-05 | Une1-like protein                                                                   |                                                            |
| Solyc04g076400.2 | Vernalization insensitive 3 (Fragment) (AHRD V1 C4PFF9_BRARC)                                                                                       | 0.99 | 1.30E-03 | Vin3-like protein 2                                                                 | GO:0005515                                                 |
| Solyc04g078470.2 | Cyclin D3-1 (AHRD V1 ***- Q2ABE7_CAMSI); Interpro domain(s) IPR015451 Cyclin D                                                                      | 0.99 | 2.21E-04 | Cyclin-d3-3-like isoform x2                                                         | GO:0005634; GO:0004723                                     |
| Solyc06g059930.2 | Sesquiterpene synthase 1 (AHRD V1 ***-                                                                                                              | 0.99 | 1.97E-04 | Germacrene c synthase-                                                              | n/a                                                        |
| Solyc07g053450.2 | BZIP transcription factor family protein (AHRD **** D7LW03_ARALY); contains Interpro domain(s) IPR011700 Basic leucine zipper                       | 0.99 | 1.32E-03 | Basic leucine zipper 61                                                             | GO:0003700; GO:0005634; GO:0006355; GO:0043565; GO:0046983 |
| Solyc08g082990.2 | Oligopeptide transporter 9 (AHRD V1 **** contains Interpro domain(s) IPR004648 Tetrapeptide transporter, OPT1/isp4                                  | 0.99 | 1.13E-06 | Oligopeptide transporter 7                                                          | GO:0055085; GO:0005427                                     |
| Solyc09g018020.2 | Expansin (AHRD V1 ***- A5H0F8_CARCN); contains domain(s) IPR002963 Expansin                                                                         | 0.99 | 2.54E-03 | Expansin alpha                                                                      | GO:0009664                                                 |
| Solyc04g008600.2 | Chromosome segregation in meiosis protein 3 V1 *--- C0NYU8_AJECG); contains Interpro domain(s) IPR012923 Replication fork protection component Swi3 | 0.98 | 6.45E-04 | Timeless-interacting protein                                                        | GO:0003676; GO:0008270                                     |
| Solyc06g072240.1 | Histone H4 (AHRD V1 ***- B6TOP4_MAIZE); Interpro domain(s) IPR001951 Histone H4                                                                     | 0.98 | 1.53E-03 | Histone h4                                                                          | GO:0000786; GO:0003677; GO:0005634; GO:0006334             |
| Solyc09g011000.2 | Laccase (AHRD V1 ***- O24042_LIRTU); contains domain(s) IPR011707 Multicopper oxidase, type 3                                                       | 0.98 | 6.54E-04 | Laccase-17                                                                          | GO:0016491                                                 |
| Solyc11g006650.1 | Heat shock protein 101 (AHRD V1 Q3L1D0_VITVI); contains Interpro domain(s) IPR004176 Clp, N-terminal                                                | 0.98 | 3.39E-04 | Double clp-n motif-containing p-loop nucleoside triphosphate hydrolases superfamily | GO:0005515; GO:0019538                                     |
| Solyc02g085390.2 | Uncharacterized ATP-dependent helicase C25A8.01c (AHRD V1 YFC1_SCHPO); contains Interpro domain(s) IPR000330 SNF2-related                           | 0.97 | 3.54E-04 | Atp-dependent dna helicase ddm1                                                     | GO:0003677; GO:0005524                                     |

|                  |                                                                                                                                                                |      |          |                                                           |                                    |
|------------------|----------------------------------------------------------------------------------------------------------------------------------------------------------------|------|----------|-----------------------------------------------------------|------------------------------------|
| Solyc03g122140.2 | L-lactate dehydrogenase (AHRD V1 ***- B2WEY8_PYRTR); Interpro domain(s) IPR012133 Alpha-hydroxy acid dehydrogenase, FMN-dependent                              | 0.97 | 9.62E-04 | Peroxisomal -2-hydroxy-acid oxidase glo4-                 | GO:0010181; GO:0016491             |
| Solyc06g051320.2 | Transferase family protein (AHRD V1 **-* contains Interpro domain(s) IPR003480 Transferase                                                                     | 0.97 | 1.68E-04 | Vinorine synthase                                         | GO:0016747                         |
| Solyc07g048100.1 | BRCA1 C Terminus domain containing protein (AHRD V1 *- Q6ATS1_ORYSJ); contains Interpro domain(s) IPR001357 BRCT                                               | 0.97 | 1.72E-03 | Unknown protein                                           | GO:0005622                         |
| Solyc07g066350.1 | Unknown Protein (AHRD V1)                                                                                                                                      | 0.97 | 1.86E-03 | Uncharacterized serine-rich protein                       |                                    |
| Solyc09g042710.2 | Myosin heavy chain-like (AHRD V1 ***- contains Interpro domain(s) IPR008545 Protein of unknown function DUF827, plant                                          | 0.97 | 2.49E-03 | Web family protein                                        |                                    |
| Solyc09g061890.2 | Pectate lyase 46388 (AHRD V1 **** contains Interpro domain(s) IPR002022 Pectate lyase/Amb allergen                                                             | 0.97 | 7.07E-04 | Probable pectate lyase 8                                  | GO:0016829                         |
| Solyc10g047530.1 | Phototropic-responsive NPH3 family protein (AHRD V1 D7KEU3_ARALY); contains Interpro domain(s) IPR004249 NPH3                                                  | 0.97 | 2.40E-03 | Root phototropism protein 3                               | GO:0005515                         |
| Solyc00g099580.1 | Gamma-glutamyltranspeptidase (AHRD V1 ***- D4Z6K6_SPHJU); contains domain(s) IPR000101 Gamma-glutamyltranspeptidase                                            | 0.96 | 2.81E-03 | Unknown Protein                                           | GO:0003677; GO:0045449             |
| Solyc01g102310.2 | Unknown Protein (AHRD V1)                                                                                                                                      | 0.96 | 9.61E-06 | Grip and coiled-coil domain-containing                    |                                    |
| Solyc01g111840.2 | MFS-type drug efflux transporter P55 (AHRD *- MFS55_MYCTU); contains Interpro domain(s) IPR016196 Major facilitator superfamily, general substrate transporter | 0.96 | 5.70E-04 | Hippocampus abundant transcript-like protein 1 isoform x2 | GO:0055085; GO:0008493             |
| Solyc02g079490.2 | Hydroxycinnamoyl-CoA shikimate/quinate hydroxycinnamoyl transferase (AHRD V1 D1GJ94_COFAR); contains Interpro domain(s) IPR003480 Transferase                  | 0.96 | 3.33E-04 | Shikimate o-hydroxycinnamoyltransferase                   | GO:0016747                         |
| Solyc02g086840.2 | Kinesin light chain-like protein (AHRD V1 D2DWB2_PHAVU); contains Interpro domain(s) IPR011990 Tetratricopeptide-like helical                                  | 0.96 | 1.33E-04 | Tetratricopeptide repeat protein 28                       | GO:0005488                         |
| Solyc02g087980.2 | Structural maintenance of chromosomes protein 4 V1 **-- D8TXU8_VOLCA); contains Interpro domain(s) IPR003395 RecF/RecN/SMC protein, N-terminal                 | 0.96 | 7.31E-04 | Structural maintenance of chromosomes protein 4           | GO:0005524; GO:0005694             |
| Solyc03g120930.1 | Avr9/Cf-9 rapidly elicited protein 146 (AHRD ***- Q9FQZ6_TOBAC)                                                                                                | 0.96 | 1.50E-03 | Avr9/Cf-9 rapidly elicited protein 146                    |                                    |
| Solyc04g015620.2 | Os01g0611000 protein (Fragment) (AHRD V1 ***- contains Interpro domain(s) IPR006946 Protein of unknown function DUF642                                         | 0.96 | 1.86E-04 | Unknown protein                                           |                                    |
| Solyc09g011820.2 | Unknown Protein (AHRD V1)                                                                                                                                      | 0.96 | 2.83E-03 | Gpi-anchored protein                                      |                                    |
| Solyc12g044630.1 | Profilin (AHRD V1 ***- Q9SMC0_TOBAC); contains domain(s) IPR005455 Profilin, plant                                                                             | 0.96 | 7.11E-04 | Profilin                                                  | GO:0003779; GO:0030036             |
| Solyc02g083610.2 | BZIP transcription factor (AHRD V1 *- contains Interpro domain(s) IPR006867 Protein of unknown function DUF632                                                 | 0.95 | 1.06E-03 | Unknown protein                                           | GO:0003677                         |
| Solyc02g089550.2 | Receptor like kinase, RLK                                                                                                                                      | 0.95 | 2.35E-05 | Protein nsp-interacting kinase 1                          | GO:0004672; GO:0005524; GO:0006468 |
| Solyc06g076920.2 | Undecaprenyl pyrophosphate synthase (AHRD V1 **** contains Interpro domain(s) IPR001441 Di-trans-poly-cis-decaprenylcistransferase-like                        | 0.95 | 2.82E-03 | Dehydrodolichyl diphosphate synthase 2                    | GO:0016765                         |
| Solyc08g080280.2 | Unknown Protein (AHRD V1)                                                                                                                                      | 0.95 | 8.26E-04 | Unknown Protein                                           |                                    |
| Solyc12g011010.1 | Meiosis 5 (AHRD V1 *- B6T5X0_MAIZE)                                                                                                                            | 0.95 | 1.30E-03 | Protodermal factor 1                                      |                                    |
| Solyc03g117550.1 | Receptor protein kinase-like (AHRD V1 *- contains Interpro domain(s) IPR002290 Serine/threonine protein kinase                                                 | 0.94 | 2.73E-04 | Receptor-like protein kinase at1g80870                    | GO:0004553; GO:0005975             |
| Solyc08g042100.2 | Armadillo/beta-catenin repeat family protein (AHRD V1 D7MAU3_ARALY); contains Interpro domain(s) IPR011989 Armadillo-like helical                              | 0.94 | 4.63E-05 | Arm repeat superfamily protein isoform 1                  | GO:0005488                         |
| Solyc08g080730.2 | Senescence-associated protein (AHRD V1 ***- B3TLS7_ELAGV); Interpro domain(s) IPR000301 Tetraspanin, subgroup                                                  | 0.94 | 2.53E-03 | Tetraspanin-10                                            | GO:0016021                         |
| Solyc03g083720.1 | Pectinesterase (AHRD V1 ***- C0PST8_PICSI); contains domain(s) IPR006501 Pectinesterase inhibitor                                                              | 0.93 | 2.55E-03 | Pectinesterase                                            | GO:0004857; GO:0030599             |
| Solyc04g075000.1 | Serine/threonine protein kinase (AHRD V1 *- contains Interpro domain(s) IPR002290 Serine/threonine protein kinase                                              | 0.93 | 1.35E-03 | Serine threonine-protein kinase-like protein              | GO:0004672; GO:0005524; GO:0006468 |
| Solyc02g062780.2 | Chromodomain-helicase-DNA-binding protein 6 (AHRD V1 **-* contains Interpro domain(s) IPR000330 SNF2-related                                                   | 0.92 | 2.01E-05 | Atp-dependent dna helicase ddm1-like isoform x1           | GO:0003677; GO:0005524             |

|                  |                                                                                                                                                       |      |          |                                                                   |                                                |
|------------------|-------------------------------------------------------------------------------------------------------------------------------------------------------|------|----------|-------------------------------------------------------------------|------------------------------------------------|
| Solyc03g093250.1 | Structural maintenance of chromosomes 2 (AHRD **-- Q52KE9_MOUSE); contains Interpro domain(s) IPR003395 RecF/RecN/SMC protein, N-terminal             | 0.92 | 1.01E-03 | Structural maintenance of chromosomes protein                     | GO:0005524; GO:0005694                         |
| Solyc03g118740.2 | Auxin efflux carrier (AHRD V1 ***- contains Interpro domain(s) IPR014024 Auxin efflux carrier, subgroup                                               | 0.92 | 1.17E-05 | Probable auxin efflux carrier component 1c                        | GO:0016021                                     |
| Solyc07g052240.2 | Laccase-22 (AHRD V1 **-- LAC22_ORYSJ); contains domain(s) IPR001117 Multicopper oxidase, type 1                                                       | 0.92 | 2.25E-03 | L-ascorbate oxidase homolog                                       | GO:0016491                                     |
| Solyc08g014190.2 | Cytochrome P450                                                                                                                                       | 0.92 | 1.80E-03 | Geraniol 8-hydroxylase                                            | n/a                                            |
| Solyc09g065590.2 | Os12g0604200 protein (Fragment) (AHRD V1 *-*- contains Interpro domain(s) IPR008546 Protein of unknown function DUF828, plant                         | 0.92 | 2.53E-03 | Auxin canalization protein                                        | GO:0035091                                     |
| Solyc11g010850.1 | 1-deoxy-D-xylulose 5-phosphate synthase 2 (AHRD V1 C7U111_SOLLC); contains Interpro domain(s) IPR005477 Deoxyxylulose-5-phosphate synthase            | 0.92 | 3.97E-05 | Probable 1-deoxy-d-xylulose-5-phosphate synthase chloroplastic    | GO:0008661; GO:0016114                         |
| Solyc01g067510.2 | Receptor-like kinase (AHRD V1 **** A7VM36_MARPO); Interpro domain(s) IPR002290 Serine/threonine protein kinase                                        | 0.91 | 1.05E-03 | Proline-rich receptor-like protein kinase perk3                   | GO:0005515; GO:0004674; GO:0006468             |
| Solyc01g095100.2 | WRKY transcription factor 23 (AHRD V1 C9D112_9ROSI); contains Interpro domain(s) IPR003657 DNA-binding WRKY                                           | 0.91 | 1.90E-03 | Wrky transcription factor 22                                      | GO:0003700; GO:0005634; GO:0043565; GO:0045449 |
| Solyc01g100030.2 | Deoxyuridine 5'-triphosphate nucleotidohydrolase (AHRD V1 ***- contains Interpro domain(s) IPR008181 DeoxyUTP pyrophosphatase subfamily 1             | 0.91 | 9.25E-04 | Deoxyuridine 5'-triphosphate nucleotidohydrolase                  | GO:00016787; GO:0046080                        |
| Solyc07g061920.2 | Glucan synthase like 3 (AHRD V1 D8R8I5_SELML); contains Interpro domain(s) IPR003440 Glycosyl transferase, family 48                                  | 0.91 | 2.98E-04 | Callose synthase 8                                                | GO:0000148; GO:0003843; GO:0006075; GO:0016020 |
| Solyc08g083210.2 | Endoglucanase 1 (AHRD V1 ***- B6U0P7_MAIZE); Interpro domain(s) IPR001701 Glycoside hydrolase, family 9                                               | 0.91 | 3.57E-04 | Endo- -beta-glucanase                                             | GO:0004553; GO:0005975                         |
| Solyc12g094700.1 | Cathepsin B-like cysteine proteinase (AHRD V1 CYSP_SCHMA); contains Interpro domain(s) IPR013128 Peptidase C1A, papain                                | 0.91 | 6.46E-05 | Xylem cysteine proteinase 1-                                      | GO:0004197; GO:0006508                         |
| Solyc01g080070.2 | Copper chaperone (AHRD V1 *--- B6TJ24_MAIZE); Interpro domain(s) IPR006121 Heavy metal transport/detoxification protein                               | 0.9  | 3.76E-05 | Neurogenic protein mastermind                                     | GO:0030001; GO:0046872                         |
| Solyc01g080770.2 | Receptor like kinase, RLK                                                                                                                             | 0.9  | 7.26E-04 | Leucine-rich repeat receptor-serine threonine-protein kinase bam3 | GO:0004674; GO:0006468                         |
| Solyc01g111330.2 | Thaumatococcus-like protein (AHRD V1 ***- Q9STX6_ARATH); Interpro domain(s) IPR001938 Thaumatin, pathogenesis-related                                 | 0.9  | 7.72E-04 | Thaumatococcus-like protein 1b                                    | GO:0005515                                     |
| Solyc02g093400.1 | Integral membrane protein MviN (AHRD V1 D8G376_9CYAN); contains Interpro domain(s) IPR004268 Flagellin assembly, membrane protein MviN                | 0.9  | 2.64E-03 | Lipid ii flippase                                                 |                                                |
| Solyc03g114690.2 | Wd-40 repeat-containing protein (AHRD V1 *--- contains Interpro domain(s) IPR017986 WD40 repeat, region                                               | 0.9  | 2.87E-04 | Wd repeat and hmg-box dna-binding protein 1                       | GO:0000166                                     |
| Solyc06g069790.2 | Gibberellin-regulated protein (AHRD V1 **-- B4UW77_ARAHY); Interpro domain(s) IPR003854 Gibberellin regulated protein                                 | 0.9  | 1.37E-04 | Gibberellin-regulated protein 6                                   |                                                |
| Solyc06g083490.2 | Tropinone reductase-like protein 16 (AHRD V1 B2BXZ1_9BRAS); contains Interpro domain(s) IPR002347 Glucose/ribitol dehydrogenase                       | 0.9  | 7.27E-04 | Tropinone reductase homolog                                       | GO:0008152; GO:0016491                         |
| Solyc07g008710.2 | Major latex-like protein (AHRD V1 ***- contains Interpro domain(s) IPR000916 Bet v I allergen                                                         | 0.9  | 1.52E-03 | Mlp-like protein 34                                               | GO:0006952; GO:0009607                         |
| Solyc07g041970.2 | Subtilisin-like protease (AHRD V1 **-- B6SZ82_MAIZE); Interpro domain(s) IPR015500 Peptidase S8, subtilisin-related                                   | 0.9  | 4.74E-05 | Subtilisin-like protease                                          | GO:0004252; GO:0006508                         |
| Solyc09g009900.2 | Pollen-specific protein - like (AHRD V1 O49527_ARATH); contains Interpro domain(s) IPR013970 Replication factor A protein 3                           | 0.9  | 9.95E-04 | Replication protein a 14 kda subunit b                            | GO:0005515                                     |
| Solyc09g072820.2 | Cellulose synthase (AHRD V1 **** B8XPP6_9ROSI); Interpro domain(s) IPR005150 Cellulose synthase                                                       | 0.9  | 4.95E-06 | Cellulose synthase a catalytic subunit 4                          | GO:0005515; GO:0008270                         |
| Solyc09g082830.2 | ARGONAUTE 1 (AHRD V1 ***- D6RUV9_TOBAC); Interpro domain(s) IPR003165 Stem cell self-renewal protein Piwi                                             | 0.9  | 2.26E-05 | Protein argonaute 10                                              | GO:0003676                                     |
| Solyc09g090500.2 | Cyclopropane-fatty-acyl-phospholipid synthase (AHRD V1 ***- C7LRK7_DESBD); Interpro domain(s) IPR003333 Cyclopropane-fatty-acyl-phospholipid synthase | 0.9  | 3.06E-04 | Pavine n-methyltransferase                                        | GO:0008610; GO:0008825                         |
| Solyc09g092520.2 | Xyloglucan endotransglucosylase/hydrolase 8 (AHRD V1 **** contains Interpro domain(s) IPR016455 Xyloglucan endotransglucosylase/hydrolase             | 0.9  | 1.27E-03 | Brassinosteroid-regulated protein bru1                            | GO:0004553; GO:0005975                         |
| Solyc12g015800.1 | RING finger family protein (AHRD V1 D6RU92_SILLA); contains Interpro domain(s) IPR018957 Zinc finger, C3HC4 RING-type                                 | 0.9  | 1.37E-03 | E3 ubiquitin-protein ligase at4g11680                             | GO:0008270                                     |
| Solyc08g076370.2 | Homeobox-leucine zipper protein ATHB-9 (AHRD V1 ATBH9_ARATH); contains Interpro domain(s) IPR002913 Lipid-binding START                               | 0.89 | 4.41E-06 | Homeobox-leucine zipper protein hdg5                              | GO:0003677; GO:0045449                         |

|                  |                                                                                                                                                                         |      |          |                                                                    |                                    |
|------------------|-------------------------------------------------------------------------------------------------------------------------------------------------------------------------|------|----------|--------------------------------------------------------------------|------------------------------------|
| Solyc08g077210.2 | Inositol 1 4 5-trisphosphate 5-phosphatase (AHRD *-** Q712G2_ARATH); contains Interpro domain(s) IPR000300 Inositol polyphosphate related phosphatase                   | 0.89 | 3.34E-04 | Type i inositol -trisphosphate 5-phosphatase 2-like                | GO:0004437; GO:0004445             |
| Solyc10g080690.1 | Patatin-like protein 3 (AHRD V1 ***- contains Interpro domain(s) IPR002641 Patatin                                                                                      | 0.89 | 9.85E-04 | Patatin-like protein 3                                             | GO:0006629                         |
| Solyc10g084150.1 | Cytokinin riboside 5&apost;-monophosphate phosphoribohydrolase LOG (AHRD **-- LOG_ORYSJ); contains Interpro domain(s) IPR005269 Conserved hypothetical protein CHP00730 | 0.89 | 8.31E-05 | Cytokinin riboside 5 - monophosphate phosphoribohydrolase log3     |                                    |
| Solyc01g101030.2 | FACT complex subunit SPT16 (AHRD V1 D3AWW1_POLPA); contains Interpro domain(s) IPR013953 FACT complex subunit Spt16p/Cdc68p                                             | 0.88 | 1.92E-04 | Fact complex subunit spt16                                         | GO:0009987; GO:0042393             |
| Solyc05g056470.1 | ABC transporter G family member 5 V1 **** AB5G_ARATH); contains Interpro domain(s) IPR013525 ABC-2 type transporter                                                     | 0.88 | 7.42E-06 | Abc transporter g family member 5                                  | GO:0016020                         |
| Solyc07g005840.2 | Cellulose synthase 3 (AHRD V1 **** contains Interpro domain(s) IPR005150 Cellulose synthase                                                                             | 0.88 | 8.64E-06 | Cellulose synthase a catalytic subunit 7                           | GO:0005515; GO:0008270             |
| Solyc07g054900.2 | Alpha-hydroxynitrile lyase (AHRD V1 **-- O49897_MANES); Interpro domain(s) IPR000073 Alpha/beta hydrolase fold-1                                                        | 0.88 | 2.57E-03 | Polyneuridine-aldehyde esterase                                    | GO:0080030; GO:0080031             |
| Solyc08g066810.2 | Glycosyl hydrolase family 5 protein/cellulase (AHRD **-- A8NVS8_COPC7); contains Interpro domain(s) IPR001547 Glycoside hydrolase, family 5                             | 0.88 | 6.20E-04 | Cellulase protein                                                  | GO:0003824; GO:0005975; GO:0043169 |
| Solyc09g014160.1 | UPF0503 protein At3g09070, chloroplastic (AHRD V1 U503A_ARATH); contains Interpro domain(s) IPR008004 Protein of unknown function DUF740                                | 0.88 | 6.36E-04 | Upf0503 protein chloroplastic                                      |                                    |
| Solyc09g092760.2 | Glycine-rich protein (AHRD V1 *-*- D2K2U4_TOBAC); Interpro domain(s) IPR010800 Glycine rich                                                                             | 0.88 | 1.24E-03 | Glycine-rich cell wall structural                                  |                                    |
| Solyc12g100180.1 | ATP-binding cassette transporter (AHRD V1 ***- contains Interpro domain(s) IPR013525 ABC-2 type transporter                                                             | 0.88 | 6.05E-04 | Pleiotropic drug resistance protein 1                              | GO:0016020                         |
| Solyc01g094750.2 | Cytochrome P450                                                                                                                                                         | 0.87 | 1.07E-04 | Cytochrome p450 86a8-                                              | GO:0004497; GO:0005506; GO:0020037 |
| Solyc02g084950.2 | Carboxyl methyltransferase 4 (AHRD V1 **** contains Interpro domain(s) IPR005299 SAM dependent carboxyl methyltransferase                                               | 0.87 | 5.03E-05 | Salicylate o-methyltransferase                                     | GO:0008168                         |
| Solyc03g031910.2 | Helicase sen1 (AHRD V1 *--- A8NRR5_COPC7)                                                                                                                               | 0.87 | 1.73E-03 | P-loop containing nucleoside triphosphate hydrolases superfamily   |                                    |
| Solyc03g064010.2 | Receptor like kinase, RLK                                                                                                                                               | 0.87 | 9.68E-05 | Probable inactive leucine-rich repeat receptor-like protein kinase | GO:0004674; GO:0006468             |
| Solyc03g083350.2 | Ubiquitin (AHRD V1 **-- Q9FNF8_ARATH); contains domain(s) IPR000403 Phosphatidylinositol -3 and 4-kinase, catalytic                                                     | 0.87 | 1.19E-03 | Phosphatidylinositol 4-kinase gamma 3                              | GO:0016773; GO:0043008             |
| Solyc03g115050.2 | Single-stranded DNA-binding replication protein A large (AHRD V1 **** D2V0Z2_NAAGR); contains Interpro domain(s) IPR004591 Replication factor-a protein 1 Rpa1          | 0.87 | 2.88E-03 | Replication protein a 70 kda dna-binding subunit b                 | GO:0003677; GO:0005634; GO:0006260 |
| Solyc04g005700.2 | Major latex-like protein (AHRD V1 **-- contains Interpro domain(s) IPR000916 Bet v I allergen                                                                           | 0.87 | 1.33E-05 | Kirola                                                             | GO:0006952; GO:0009607             |
| Solyc04g015030.2 | Metal ion binding protein (AHRD V1 B6SZL4_MAIZE); contains Interpro domain(s) IPR006121 Heavy metal transport/detoxification protein                                    | 0.87 | 9.67E-06 | Neurofilament medium polypeptide-like                              | GO:0030001; GO:0046872             |
| Solyc04g074990.2 | Zinc finger-homeodomain protein 1 (Fragment) (AHRD *--- B0LK17_YUCFI); contains Interpro domain(s) IPR006456 ZF-HD homeobox protein Cys/His-rich dimerisation region    | 0.87 | 9.64E-05 | Zinc-finger homeodomain protein 2-                                 | GO:0003677; GO:0045449             |
| Solyc04g082950.2 | Unknown Protein (AHRD V1); contains Interpro IPR008166 Protein of unknown function DUF23                                                                                | 0.87 | 1.00E-03 | PREDICTED: uncharacterized protein LOC101247215                    |                                    |
| Solyc05g010320.2 | Chalcone--flavonone isomerase (AHRD V1 ***- D7LV11_ARALY); Interpro domain(s) IPR003466 Chalcone isomerase, subgroup                                                    | 0.87 | 2.14E-03 | Chalcone isomerase                                                 | GO:0042398                         |
| Solyc05g013010.2 | Sulfotransferase family protein (AHRD V1 **** contains Interpro domain(s) IPR000863 Sulfotransferase                                                                    | 0.87 | 6.41E-04 | Cytosolic sulfotransferase 5-                                      | GO:0008146                         |
| Solyc09g082510.2 | Kinase interacting family protein (AHRD V1 D7KCB2_ARALY); contains Interpro domain(s) IPR011684 KIP1-like                                                               | 0.87 | 2.11E-04 | Intracellular protein transport protein uso1-                      |                                    |
| Solyc10g074540.1 | Expressed protein (Fragment) (AHRD V1 ***- contains Interpro domain(s) IPR006766 Phosphate-induced protein 1 conserved region                                           | 0.87 | 2.43E-04 | Protein exordium-                                                  |                                    |
| Solyc01g079110.2 | Histone H3 (AHRD V1 ***- D8L9K7_WHEAT); Interpro domain(s) IPR000164 Histone H3                                                                                         | 0.86 | 2.25E-03 | Histone                                                            | GO:0003677                         |



|                  |                                                                                                                                                                         |      |          |                                                                            |                                                            |
|------------------|-------------------------------------------------------------------------------------------------------------------------------------------------------------------------|------|----------|----------------------------------------------------------------------------|------------------------------------------------------------|
| Solyc02g068070.2 | Lipase (AHRD V1 **** Q1XBG1_RICCO); contains domain(s) IPR006693 AB-hydrolase associated lipase region                                                                  | 0.86 | 2.89E-03 | Triacylglycerol lipase 2-                                                  | GO:0006629; GO:0004806                                     |
| Solyc02g093100.2 | Receptor like kinase, RLK                                                                                                                                               | 0.86 | 9.89E-04 | Probable inactive receptor kinase at5g67200                                | GO:0004674; GO:0006468                                     |
| Solyc03g111680.2 | DNA polymerase III gamma/tau subunit (AHRD *-*- B0JGE9_MICAN); contains Interpro domain(s) IPR012763 DNA polymerase III, subunit gamma/ tau                             | 0.86 | 4.59E-04 | Protein stichel-                                                           | GO:0003887; GO:0005524; GO:0006260; GO:0009360             |
| Solyc05g012950.1 | Sulfotransferase family protein (AHRD V1 **** contains Interpro domain(s) IPR000863 Sulfotransferase                                                                    | 0.86 | 1.48E-03 | Cytosolic sulfotransferase 5-like                                          | GO:0008146                                                 |
| Solyc06g064820.2 | GDSL esterase/lipase At1g71691 (AHRD V1 ***- contains Interpro domain(s) IPR001087 Lipase, GDSL                                                                         | 0.86 | 1.39E-03 | Gdsl esterase lipase at1g71691-                                            | GO:0006629; GO:0016788                                     |
| Solyc11g066130.1 | Thaumatococcus-like protein (AHRD V1 **-- D2KU75_CITJA); Interpro domain(s) IPR017949 Thaumatococcus, conserved site IPR001938 Thaumatococcus, pathogenesis-related     | 0.86 | 8.26E-04 | Osmotin-like protein                                                       |                                                            |
| Solyc01g080290.2 | Plasma membrane associated protein-like (AHRD V1 Q8LG79_ARATH); contains Interpro domain(s) IPR008390 AWPM-19-like                                                      | 0.85 | 1.88E-03 | Awpm-19-like protein                                                       |                                                            |
| Solyc02g071710.2 | GDSL esterase/lipase At1g29670 (AHRD V1 ***- contains Interpro domain(s) IPR001087 Lipase, GDSL                                                                         | 0.85 | 7.33E-04 | Gdsl esterase lipase                                                       | GO:0006629; GO:0016788                                     |
| Solyc02g090580.2 | Os03g0859900 protein (Fragment) (AHRD V1 *-*- contains Interpro domain(s) IPR006869 Protein of unknown function DUF547                                                  | 0.85 | 8.70E-05 | Kinesin-like protein kif11                                                 |                                                            |
| Solyc04g008230.2 | Polygalacturonase (AHRD V1 ***- B6TYD6_MAIZE); contains domain(s) IPR012334 Pectin lyase fold                                                                           | 0.85 | 9.30E-05 | Polygalacturonase                                                          | GO:0005975                                                 |
| Solyc04g008650.2 | Receptor like kinase, RLK                                                                                                                                               | 0.85 | 1.11E-03 | Inactive leucine-rich repeat receptor-like serine threonine-protein kinase | GO:0004674; GO:0006468                                     |
| Solyc04g015470.2 | Phosphatidylinositol-4-phosphate 5-kinase family protein (AHRD V1 D7L735_ARALY); contains Interpro domain(s) IPR017163 Phosphatidylinositol-4-phosphate 5-kinase, plant | 0.85 | 3.61E-04 | Phosphatidylinositol 4-phosphate 5-kinase 1                                | GO:0016307; GO:0046488                                     |
| Solyc05g005870.2 | Nodulin MtN21 family protein (AHRD V1 D7KXZ8_ARALY); contains Interpro domain(s) IPR000620 Protein of unknown function DUF6, transmembrane                              | 0.85 | 1.18E-03 | Wat1-related protein                                                       | GO:0016020                                                 |
| Solyc05g013220.2 | Fatty acid elongase 3-ketoacyl-CoA synthase (AHRD **** Q6DUV6_BRANA); contains Interpro domain(s) IPR012392 Very-long-chain 3-ketoacyl-CoA synthase                     | 0.85 | 2.97E-04 | 3-ketoacyl- synthase 19                                                    | GO:0003824; GO:0008152                                     |
| Solyc05g049980.2 | Glycoside hydrolase family 28 protein/polygalacturonase family (AHRD V1 **-- Q1PF10_ARATH); contains Interpro domain(s) IPR012334 Pectin lyase fold                     | 0.85 | 1.36E-05 | Probable polygalacturonase                                                 | GO:0005975                                                 |
| Solyc09g007360.2 | Interactor of constitutive active ROPs 3 V1 ***- ICR3_ARATH)                                                                                                            | 0.85 | 1.69E-03 | Interactor of constitutive active rops chloroplastic-like                  |                                                            |
| Solyc02g085110.2 | Laccase (AHRD V1 ***- Q9AUI0_PINTA); contains domain(s) IPR017761 Laccase                                                                                               | 0.84 | 1.58E-03 | Laccase-11                                                                 | GO:0016491                                                 |
| Solyc03g123620.2 | Pectinesterase (AHRD V1 ***- B9GXZ7_POPTR); contains domain(s) IPR000070 Pectinesterase, catalytic                                                                      | 0.84 | 2.65E-03 | Pectinesterase 3                                                           | GO:0030599                                                 |
| Solyc05g009660.2 | BZIP transcription factor (AHRD V1 **** contains Interpro domain(s) IPR011616 bZIP transcription factor, bZIP-1                                                         | 0.84 | 8.64E-04 | Transcription factor hbp-1b                                                | GO:0003700; GO:0005634; GO:0006355; GO:0043565; GO:0046983 |
| Solyc05g009990.2 | LRR receptor-like serine/threonine-protein kinase, RLP                                                                                                                  | 0.84 | 3.11E-05 | Piriformospora indica-insensitive protein 2                                | GO:0004553; GO:0005975                                     |
| Solyc10g084970.1 | Unknown Protein (AHRD V1)                                                                                                                                               | 0.84 | 4.88E-05 | Unknown Protein                                                            |                                                            |
| Solyc05g006020.2 | Nucleobase ascorbate transporter (AHRD V1 **-* contains Interpro domain(s) IPR006043 Xanthine/uracil/vitamin C permease                                                 | 0.83 | 2.02E-03 | Nucleobase-ascorbate transporter 7                                         | GO:0005215; GO:0006810; GO:0016020                         |
| Solyc06g009780.2 | Kinesin (AHRD V1 ***- Q5MNV6_GOSHI); contains domain(s) IPR001752 Kinesin, motor region                                                                                 | 0.83 | 5.58E-05 | Kinesin-4                                                                  | GO:0003777; GO:0005524; GO:0007018                         |
| Solyc08g008610.2 | Hydrolase alpha/beta fold family protein (AHRD ***- D7M8X4_ARALY); contains Interpro domain(s) IPR000073 Alpha/beta hydrolase fold-1                                    | 0.83 | 1.95E-03 | Alpha beta-hydrolases superfamily protein                                  |                                                            |
| Solyc08g014430.2 | Formin 3 (AHRD V1 *-*- D0QAN4_ARATH); Interpro domain(s) IPR015425 Actin-binding FH2                                                                                    | 0.83 | 5.81E-04 | Formin-like protein 1                                                      | GO:0030036                                                 |
| Solyc08g078520.2 | Os03g0859900 protein (Fragment) (AHRD V1 *--- contains Interpro domain(s) IPR006869 Protein of unknown function DUF547                                                  | 0.83 | 4.65E-04 | Unknown Protein                                                            |                                                            |
| Solyc10g079090.1 | Chaperone protein dnaJ 6 (AHRD V1 B6TT74_MAIZE); contains Interpro domain(s) IPR003095 Heat shock protein DnaJ                                                          | 0.83 | 1.15E-03 | Chaperone protein dnaJ 6                                                   | GO:0006457; GO:0031072; GO:0051082                         |

|                  |                                                                                                                                                         |      |          |                                                                                               |                                                |
|------------------|---------------------------------------------------------------------------------------------------------------------------------------------------------|------|----------|-----------------------------------------------------------------------------------------------|------------------------------------------------|
| Solyc01g107800.2 | Expressed protein (Fragment) (AHRD V1 *-*- contains Interpro domain(s) IPR006514 Protein of unknown function DUF579, plant                              | 0.82 | 2.24E-03 | Protein irx15                                                                                 |                                                |
| Solyc02g082260.2 | Hydroxy-methylglutaryl-coenzyme A reductase (AHRD V1 **** contains Interpro domain(s) IPR004554 Hydroxymethylglutaryl-CoA reductase, class I, catalytic | 0.82 | 2.23E-03 | 3-hydroxy-3-methylglutaryl-coenzyme a reductase 1                                             | GO:0004420; GO:0015936; GO:0050662; GO:0055114 |
| Solyc02g088820.2 | Serine carboxypeptidase K10B2.2 (AHRD V1 **** contains Interpro domain(s) IPR001563 Peptidase S10, serine carboxypeptidase                              | 0.82 | 2.58E-04 | Unknown Protein                                                                               | GO:0004185; GO:0006508                         |
| Solyc02g091890.1 | MRNA complete cds clone RAFL24-22-E06 (AHRD *-*- Q67YL8_ARATH)                                                                                          | 0.82 | 9.23E-04 | Dentin sialophosphoprotein                                                                    |                                                |
| Solyc03g112620.2 | Carboxyl-terminal proteinase (AHRD V1 ***- B4FXN3_MAIZE); Interpro domain(s) IPR004314 Protein of unknown function DUF239, plant                        | 0.82 | 6.70E-04 | Unknown Protein                                                                               |                                                |
| Solyc03g113450.2 | Receptor like kinase, RLK                                                                                                                               | 0.82 | 8.43E-04 | Lrr receptor-like serine threonine-protein kinase fei 2                                       | GO:0004675; GO:0006468                         |
| Solyc04g045530.2 | DNA primase large subunit (AHRD V1 B5X2T9_SALSA); contains Interpro domain(s) IPR016558 DNA primase, large subunit, eukaryotic                          | 0.82 | 2.22E-03 | Probable dna primase large subunit                                                            | GO:0003896; GO:0005658; GO:0006269             |
| Solyc05g014690.1 | ATP-dependent DNA helicase (AHRD V1 *-** contains Interpro domain(s) IPR004589 DNA helicase, ATP-dependent, RecQ type                                   | 0.82 | 2.69E-03 | Atp-dependent dna helicase q                                                                  | GO:0000739; GO:0005524; GO:0006310; GO:0000405 |
| Solyc06g075220.1 | Fasciclin-like arabinogalactan protein 5 (AHRD V1 A9XTL0_GOSHI); contains Interpro domain(s) IPR000782 FAS1 domain                                      | 0.82 | 2.63E-04 | Fasciclin-like arabinogalactan protein 11                                                     | GO:0004773                                     |
| Solyc08g076820.2 | BHLH transcription factor (AHRD V1 **** contains Interpro domain(s) IPR011598 Helix-loop-helix DNA-binding                                              | 0.82 | 5.71E-05 | Transcription factor bhlh71                                                                   | GO:0005634; GO:0030528; GO:0045449             |
| Solyc01g065500.2 | Phosphoribosylanthranilate transferase (Fragment) (AHRD V1 *--- contains Interpro domain(s) IPR013583 Phosphoribosyltransferase C-terminal, plant       | 0.81 | 2.88E-03 | Protein quirky                                                                                |                                                |
| Solyc01g103530.2 | Receptor like kinase, RLK                                                                                                                               | 0.81 | 2.71E-04 | Leucine-rich repeat receptor-serine threonine-protein kinase bam3                             | GO:0004674; GO:0006468                         |
| Solyc02g080880.2 | Aspartic proteinase (AHRD V1 *-* Q8L6A8_THECC); Interpro domain(s) IPR001461 Peptidase A1                                                               | 0.81 | 1.13E-04 | Aspartic proteinase                                                                           | GO:0006508; GO:0004190                         |
| Solyc04g008500.2 | C2H2L domain class transcription factor (AHRD *-* D9ZIU0_MALDO); contains Interpro domain(s) IPR007087 Zinc finger, C2H2-type                           | 0.81 | 3.76E-04 | Protein indeterminate-domain chloroplastic                                                    | GO:0005622; GO:0008270                         |
| Solyc05g007930.2 | Beta-1 3-galactosyltransferase-like protein (AHRD V1 **** contains Interpro domain(s) IPR002659 Glycosyl transferase, family 31                         | 0.81 | 3.98E-04 | Beta- galactosyltransferase 15                                                                | GO:0005529; GO:0010488                         |
| Solyc06g048620.2 | Receptor like kinase, RLK                                                                                                                               | 0.81 | 1.89E-04 | Probably inactive leucine-rich repeat receptor-like protein kinase                            | GO:0005515; GO:0004675                         |
| Solyc07g053950.1 | Unknown Protein (AHRD V1)                                                                                                                               | 0.81 | 6.03E-04 | Unknown protein                                                                               |                                                |
| Solyc07g056410.2 | Receptor like kinase, RLK                                                                                                                               | 0.81 | 1.66E-03 | Leucine-rich repeat receptor-serine threonine-protein kinase                                  | GO:0006468                                     |
| Solyc08g079740.2 | Receptor like kinase, RLK                                                                                                                               | 0.81 | 2.79E-04 | Probable lrr receptor-like serine threonine-protein kinase                                    | GO:0004675; GO:0006468                         |
| Solyc01g006540.2 | Lipoxygenase (AHRD V1 **** Q96573_SOLLC); contains domain(s) IPR001246 Lipoxygenase, plant                                                              | 0.8  | 6.75E-05 | Linoleate 13s-lipoxygenase 2-chloroplastic                                                    | GO:0005506; GO:0009055; GO:0016165; GO:0055114 |
| Solyc01g096940.2 | Receptor like kinase, RLK                                                                                                                               | 0.8  | 2.10E-05 | Probably inactive leucine-rich repeat receptor-like protein kinase                            | GO:0005515; GO:0004675; GO:0006468             |
| Solyc02g084610.1 | LRR receptor-like serine/threonine-protein kinase, RLP                                                                                                  | 0.8  | 2.39E-04 | Probable lrr receptor-like serine threonine-protein kinase                                    | GO:0005515                                     |
| Solyc03g111820.2 | Sieve element-occluding protein 3 (AHRD V1 B5THF7_MEDTR)                                                                                                | 0.8  | 4.80E-04 | Sieve element occlusion a                                                                     |                                                |
| Solyc04g077190.2 | Endo-1 4-beta-xylanase (AHRD V1 *-** B6SW51_MAIZE); Interpro domain(s) IPR013781 Glycoside hydrolase, subgroup, catalytic core                          | 0.8  | 3.20E-04 | Glycosyl hydrolase family 10 protein carbohydrate-binding domain-containing protein isoform 1 | GO:0031176; GO:0016798                         |
| Solyc07g049500.2 | Argonaute 4-like protein (AHRD V1 ***- contains Interpro domain(s) IPR003165 Stem cell self-renewal protein Piwi                                        | 0.8  | 9.75E-04 | Protein argonaute 16                                                                          | GO:0035197; GO:0003676; GO:0019899             |
| Solyc01g096190.2 | Calcium-transporting ATPase (AHRD V1 ***- A8NHF4_COPC7); Interpro domain(s) IPR005782 ATPase, P-type, calcium-transporting                              | 0.79 | 6.77E-05 | Calcium-transporting endoplasmic reticulum-type                                               | GO:0006754; GO:0006812; GO:0015662; GO:0016020 |
| Solyc01g106690.2 | Unknown Protein (AHRD V1); contains Interpro IPR010410 Protein of unknown function DUF1005                                                              | 0.79 | 7.06E-04 | Formin-like protein 18                                                                        |                                                |

|                  |                                                                                                                                                                      |      |          |                                                            |                                                |
|------------------|----------------------------------------------------------------------------------------------------------------------------------------------------------------------|------|----------|------------------------------------------------------------|------------------------------------------------|
| Solyc02g071820.2 | Receptor like kinase, RLK                                                                                                                                            | 0.79 | 1.01E-03 | Probable lrr receptor-like serine threonine-protein kinase | GO:0005515; GO:0016301; GO:0006468             |
| Solyc03g007800.2 | Topoisomerase 1-associated factor 1 (AHRD V1 C9S978_VERA1); contains Interpro domain(s) IPR007725 Timeless C-terminal                                                | 0.79 | 2.13E-04 | Protein timeless homolog                                   |                                                |
| Solyc04g081240.2 | Auxin response factor 5 (AHRD V1 D9IVB5_SOLLIC); contains Interpro domain(s) IPR010525 Auxin response factor                                                         | 0.79 | 5.43E-04 | Auxin response factor 5                                    | GO:0003677; GO:0005634; GO:0009725; GO:0045449 |
| Solyc07g063850.2 | Indole-3-acetic acid-amido synthetase GH3.8 (AHRD V1 B6U4E2_MAIZE); contains Interpro domain(s) IPR004993 GH3 auxin-responsive promoter                              | 0.79 | 1.91E-03 | Indole-3-acetic acid-amido synthetase                      | GO:0010279                                     |
| Solyc08g023280.2 | Tripartite motif-containing 22 (Predicted) (AHRD V1 B0VXD4_CALJA); contains Interpro domain(s) IPR001357 BRCT                                                        | 0.79 | 1.53E-03 | Protein breast cancer susceptibility 1 homolog             | GO:0005622                                     |
| Solyc08g079090.2 | Laccase-22 (AHRD V1 ***- LAC22_ORYSJ); contains domain(s) IPR001117 Multicopper oxidase, type 1                                                                      | 0.79 | 2.51E-03 | Monocopper oxidase-like protein sku5                       | GO:0016491                                     |
| Solyc10g007870.2 | Tumor-related protein (AHRD V1 ***- Q40447_9SOLA)                                                                                                                    | 0.79 | 4.16E-05 | Thionin-like protein                                       |                                                |
| Solyc11g007330.1 | cDNA clone J033118E13 full insert sequence V1 **-- B7EU28_ORYSJ); contains Interpro domain(s) IPR007033 Protein of unknown function DUF662                           | 0.79 | 1.90E-03 | Rab6-interacting golgin                                    |                                                |
| Solyc01g090440.2 | Unknown Protein (AHRD V1)                                                                                                                                            | 0.78 | 1.88E-04 | Peptidyl-prolyl cis-trans isomerase fkbp20-2               |                                                |
| Solyc01g111570.2 | Receptor-like kinase (AHRD V1 *- *- A7VM42_MARPO); Interpro domain(s) IPR002290 Serine/threonine protein kinase                                                      | 0.78 | 2.32E-03 | Probable receptor-like serine threonine-protein kinase     | GO:0004672; GO:0005524; GO:0006468             |
| Solyc02g065240.2 | Hydrolase alpha/beta fold family protein (AHRD ***- D7LG04_ARALY); contains Interpro domain(s) IPR000073 Alpha/beta hydrolase fold-1                                 | 0.78 | 1.98E-04 | Salicylic acid-binding protein 2                           | GO:0080030; GO:0080032                         |
| Solyc02g070780.2 | DNA replication licensing factor MCM3 (AHRD **** Q16NY8_AEDAE); contains Interpro domain(s) IPR008046 MCM protein 3                                                  | 0.78 | 6.34E-04 | Dna replication licensing factor mcm3 homolog 2            | GO:0003677; GO:0005524; GO:0005634; GO:0006270 |
| Solyc03g097380.2 | Heavy metal-associated domain containing protein expressed V1 *--- Q7XG81_ORYSJ); contains Interpro domain(s) IPR006121 Heavy metal transport/detoxification protein | 0.78 | 5.80E-05 | Neurofilament medium polypeptide                           | GO:0030001; GO:0046872                         |
| Solyc06g071330.2 | Nucleobase ascorbate transporter (AHRD V1 **-* contains Interpro domain(s) IPR006043 Xanthine/uracil/vitamin C permease                                              | 0.78 | 1.17E-03 | Nucleobase-ascorbate transporter 6                         | GO:0005215; GO:0006810; GO:0016020             |
| Solyc09g092740.2 | Unknown Protein (AHRD V1); contains Interpro IPR010800 Glycine rich                                                                                                  | 0.78 | 1.47E-04 | Fam10 family protein                                       | GO:0005737                                     |
| Solyc12g008530.1 | Pectinesterase (AHRD V1 ***- B9RKG6_RICCO); contains domain(s) IPR000070 Pectinesterase, catalytic                                                                   | 0.78 | 4.24E-05 | Probable pectinesterase 53                                 | GO:0005618                                     |
| Solyc01g079240.2 | Long-chain-fatty-acid--CoA ligase family protein (AHRD V1 D7LGL1_ARALY); contains Interpro domain(s) IPR000873 AMP-dependent synthetase and ligase                   | 0.77 | 2.17E-03 | Unknown Protein                                            | GO:0003824; GO:0008152                         |
| Solyc03g082860.2 | Histone-lysine N-methyltransferase (AHRD V1 ***- D8L815_9POAL); Interpro domain(s) IPR001214 SET                                                                     | 0.77 | 1.96E-03 | Histone-lysine n-methyltransferase atrx6                   | GO:0005515; GO:0008270; GO:0003677             |
| Solyc03g120380.2 | Auxin response factor 9 (AHRD V1 ARFI_ARATH); contains Interpro domain(s) IPR003311 AUX/IAA protein                                                                  | 0.77 | 3.02E-04 | Auxin-induced protein aux22                                | GO:0005634; GO:0045449                         |
| Solyc04g078810.2 | Remorin (AHRD V1 ***- Q00M66_SOYBN); contains domain(s) IPR005516 Remorin, C-terminal region                                                                         | 0.77 | 1.47E-03 | Remorin family protein isoform 2                           |                                                |
| Solyc05g012790.2 | Palmitoyltransferase erf2 (AHRD V1 *- *- C5FZ11_NANOT); Interpro domain(s) IPR001594 Zinc finger, DHHC-type                                                          | 0.77 | 8.53E-04 | Probable protein s-acyltransferase 22                      | GO:0008270                                     |
| Solyc09g011050.2 | Laccase (AHRD V1 ***- O24042_LIRTU); contains domain(s) IPR011707 Multicopper oxidase, type 3                                                                        | 0.77 | 2.88E-03 | Laccase-17                                                 | GO:0016491                                     |
| Solyc09g074930.2 | REF-like stress related protein 1 (AHRD *--- Q6XNP4_HEVBR); contains Interpro domain(s) IPR008802 Rubber elongation factor                                           | 0.77 | 4.56E-04 | Stress-related protein                                     |                                                |
| Solyc12g057080.1 | UDP-glucuronosyltransferase (AHRD V1 **-- Q5UB81_ARATH); contains domain(s) IPR002213 UDP-glucuronosyl/UDP-glucosyltransferase                                       | 0.77 | 2.04E-03 | 7-deoxyloganetin glucosyltransferase                       | GO:0008152; GO:0016758                         |
| Solyc02g030480.2 | Cinnamyl alcohol dehydrogenase-like protein (AHRD V1 A9PHZ1_POPTR); contains Interpro domain(s) IPR002085 Alcohol dehydrogenase superfamily, zinc-containing         | 0.76 | 1.84E-03 | Probable cinnamyl alcohol dehydrogenase 6                  | GO:0008270; GO:0016491                         |
| Solyc02g090070.2 | Phototropic-responsive NPH3 family protein (AHRD V1 D7MMF7_ARALY); contains Interpro domain(s) IPR004249 NPH3                                                        | 0.76 | 1.14E-03 | Btb poz domain-containing protein                          | GO:0005515                                     |
| Solyc03g121610.2 | Receptor-like kinase (AHRD V1 **** A7VM33_MARPO); Interpro domain(s) IPR002290 Serine/threonine protein kinase                                                       | 0.76 | 1.84E-03 | Receptor-like serine threonine-protein kinase ale2         | GO:0004674; GO:0006468                         |

|                  |                                                                                                                                                 |      |          |                                                                                               |                                                            |
|------------------|-------------------------------------------------------------------------------------------------------------------------------------------------|------|----------|-----------------------------------------------------------------------------------------------|------------------------------------------------------------|
| Solyc05g009820.2 | Glycosyltransferase family GT8 protein (AHRD V1 D0ECQ6_POPDE); contains Interpro domain(s) IPR002495 Glycosyl transferase, family 8             | 0.76 | 2.85E-04 | Probable galacturonosyltransferase-like 3                                                     | GO:0016757                                                 |
| Solyc09g015040.1 | Os08g0119500 protein (Fragment) (AHRD V1 *-*)                                                                                                   | 0.76 | 1.94E-03 | Unknown Protein                                                                               |                                                            |
| Solyc09g092510.2 | Unknown Protein (AHRD V1)                                                                                                                       | 0.76 | 8.13E-04 | Unknown Protein                                                                               |                                                            |
| Solyc11g013270.1 | Os01g0841200 protein (Fragment) (AHRD V1 ***- contains Interpro domain(s) IPR004348 Protein of unknown function DUF246, plant                   | 0.76 | 7.96E-04 | Unknown Protein                                                                               |                                                            |
| Solyc01g006370.2 | Glucan synthase like 3 (AHRD V1 D8R8I5_SELML); contains Interpro domain(s) IPR003440 Glycosyl transferase, family 48                            | 0.75 | 2.73E-03 | Callose synthase 3                                                                            | GO:0000148; GO:0003843; GO:0006075; GO:0016020             |
| Solyc01g079500.2 | DNA replication licensing factor (AHRD V1 Q2U020_ASPOR); contains Interpro domain(s) IPR008050 MCM protein 7                                    | 0.75 | 1.13E-03 | Dna replication licensing factor mcm7                                                         | GO:0003677; GO:0005524; GO:0005634; GO:0006270             |
| Solyc06g008510.2 | CDT1a protein (AHRD V1 ***- Q710F0_ARATH); Interpro domain(s) IPR014939 DNA replication factor CDT1-like                                        | 0.75 | 8.60E-04 | Cdt1-like protein chloroplastic                                                               | GO:0005515; GO:0004693                                     |
| Solyc06g069820.2 | Unknown Protein (AHRD V1); contains Interpro IPR007750 Protein of unknown function DUF674                                                       | 0.75 | 1.28E-03 | Unknown Protein                                                                               |                                                            |
| Solyc10g008490.2 | Protein phosphatase 2c (AHRD V1 ***- contains Interpro domain(s) IPR015655 Protein phosphatase 2C                                               | 0.75 | 1.09E-03 | Probable protein phosphatase 2c                                                               | GO:0003824                                                 |
| Solyc12g044840.1 | Receptor-like kinase (AHRD V1 *-*- A7VM65_9VIRI); Interpro domain(s) IPR002290 Serine/threonine protein kinase                                  | 0.75 | 2.10E-03 | Inactive protein kinase selmodraft                                                            | GO:0006468                                                 |
| Solyc02g086650.2 | Glucose-6-phosphate/phosphate translocator 2 (AHRD V1 **** contains Interpro domain(s) IPR004696 Tpt phosphate/phosphoenolpyruvate translocator | 0.74 | 1.28E-03 | Phosphoenolpyruvate phosphate translocator chloroplastic                                      | GO:0008524; GO:0016020                                     |
| Solyc03g005460.2 | DNA helicase (AHRD V1 ***- C4R4A1_PICPG); Interpro domain(s) IPR000330 SNF2-related                                                             | 0.74 | 1.33E-03 | Swi snf-related matrix-associated actin-dependent regulator of chromatin subfamily a member 3 | GO:0003676; GO:0008270; GO:0016818                         |
| Solyc03g078780.1 | UDP-glucosyltransferase (AHRD V1 **** C0LNQ9_MAIZE); contains domain(s) IPR002213 UDP-glucuronosyl/UDP-glucosyltransferase                      | 0.74 | 2.90E-03 | Udp-glucosyltransferase 76f1                                                                  | GO:0008152; GO:0016758                                     |
| Solyc04g082420.2 | BTB/POZ domain-containing protein (AHRD V1 ***- contains Interpro domain(s) IPR013089 Kelch related                                             | 0.74 | 1.55E-03 | Btb poz domain-containing protein                                                             | GO:0005515                                                 |
| Solyc08g080780.2 | SKIP interacting protein 24 (Fragment) (AHRD *- B8Q8B0_ORYSI)                                                                                   | 0.74 | 2.43E-04 | Unknown Protein                                                                               |                                                            |
| Solyc10g080090.1 | HAT family dimerisation domain containing protein (AHRD V1 ***- Q6AVI0_ORYSJ); contains Interpro domain(s) IPR008906 HAT dimerisation           | 0.74 | 9.71E-04 | Zinc finger bed domain-containing protein daysleeper                                          | GO:0003677                                                 |
| Solyc02g093300.2 | DNA polymerase (AHRD V1 **** B9SC90_RICCO); Interpro domain(s) IPR004578 DNA-directed DNA polymerase, family B, pol2                            | 0.73 | 5.95E-04 | Dna polymerase alpha catalytic subunit                                                        | GO:0000166; GO:0003677; GO:0003887; GO:0005634; GO:0006260 |
| Solyc03g093460.2 | Receptor-like kinase (AHRD V1 ***- C0SW26_SOYBN); Interpro domain(s) IPR002290 Serine/threonine protein kinase                                  | 0.73 | 1.78E-03 | Kinase-like protein tmk1                                                                      | GO:0006468                                                 |
| Solyc03g118310.2 | BHLH transcription factor (AHRD V1 *-** contains Interpro domain(s) IPR011598 Helix-loop-helix DNA-binding                                      | 0.73 | 8.42E-04 | Transcription factor ice1                                                                     | GO:0005634; GO:0030528; GO:0045449                         |
| Solyc04g078750.2 | Harpin-induced protein (AHRD V1 ***- B6TDG9_MAIZE); Interpro domain(s) IPR010847 Harpin-induced 1                                               | 0.73 | 2.40E-03 | Unknown Protein                                                                               |                                                            |
| Solyc05g051640.2 | Receptor like kinase, RLK                                                                                                                       | 0.73 | 1.29E-03 | Leucine-rich repeat receptor-like protein kinase tdr                                          | GO:0004675; GO:0006468                                     |
| Solyc06g048950.2 | Receptor like kinase, RLK                                                                                                                       | 0.73 | 9.19E-04 | Probably inactive leucine-rich repeat receptor-like protein kinase                            | GO:0004675; GO:0006468                                     |
| Solyc07g047830.2 | Bzip-like transcription factor-like (AHRD V1 *-*- contains Interpro domain(s) IPR006867 Protein of unknown function DUF632                      | 0.73 | 9.68E-04 | Unknown protein                                                                               |                                                            |
| Solyc07g049550.2 | 1-aminocyclopropane-1-carboxylate oxidase (AHRD V1 **** Q94F66_SOLTU); Interpro domain(s) IPR005123 Oxoglutarate and iron-dependent oxygenase   | 0.73 | 2.25E-04 | 1-aminocyclopropane-1-carboxylate oxidase                                                     | GO:0016491                                                 |
| Solyc08g067240.2 | DNA topoisomerase 2-binding protein 1 (AHRD *- TOPB1_MOUSE); contains Interpro domain(s) IPR001357 BRCT                                         | 0.73 | 8.19E-04 | Brct domain-containing dna repair protein                                                     | GO:0005622                                                 |
| Solyc08g081120.2 | Kinesin-like protein 73641-79546 (AHRD V1 ***-                                                                                                  | 0.73 | 5.28E-04 | Kinesin kp1                                                                                   |                                                            |
| Solyc09g092460.2 | Receptor-like kinase (AHRD V1 **** C0SW31_SOYBN); Interpro domain(s) IPR002290 Serine/threonine protein kinase                                  | 0.73 | 6.03E-04 | Probable receptor protein kinase tmk1                                                         | GO:0004672; GO:0005524; GO:0006468                         |
| Solyc10g085070.1 | UPF0503 protein At3g09070, chloroplastic (AHRD V1 U503A_ARATH); contains Interpro domain(s) IPR008004 Protein of unknown function DUF740        | 0.73 | 2.09E-03 | Upf0503 protein chloroplastic                                                                 |                                                            |

|                  |                                                                                                                                                   |      |          |                                                            |                                                            |
|------------------|---------------------------------------------------------------------------------------------------------------------------------------------------|------|----------|------------------------------------------------------------|------------------------------------------------------------|
| Solyc12g014140.1 | Transcription factor CYCLOIDEA (Fragment) (AHRD V1 CYCLD_ANTML); contains Interpro domain(s) IPR005333 Transcription factor, TCP                  | 0.73 | 1.38E-04 | Transcription factor tcp4                                  |                                                            |
| Solyc12g056300.1 | Receptor like kinase, RLK                                                                                                                         | 0.73 | 4.92E-04 | Probable lrr receptor-like serine threonine-protein kinase | GO:0006468                                                 |
| Solyc02g092930.1 | MYB transcription factor (AHRD V1 **** contains Interpro domain(s) IPR015495 Myb transcription factor                                             | 0.72 | 1.46E-03 | Transcription factor myb44                                 | GO:0005524; GO:0003700                                     |
| Solyc04g082710.2 | Cathepsin B-like cysteine proteinase 3 (AHRD **-- CPR3_CAEEL); contains Interpro domain(s) IPR013128 Peptidase C1A, papain                        | 0.72 | 2.69E-04 | Xylem cysteine proteinase 1                                | GO:0004197; GO:0006508                                     |
| Solyc07g007980.2 | ATP binding / serine-threonine kinase (AHRD **** C5DB71_VITVI); contains Interpro domain(s) IPR002290 Serine/threonine protein kinase             | 0.72 | 7.18E-04 | Probable receptor-like protein kinase                      | GO:0004672; GO:0005524; GO:0006468                         |
| Solyc10g011820.2 | Delta-6 desaturase (AHRD V1 **** D2KBG7_RIBNI); Interpro domain(s) IPR012171 Fatty acid/sphingolipid desaturase                                   | 0.72 | 7.12E-04 | Delta -fatty-acid desaturase-                              | GO:0020037                                                 |
| Solyc10g085850.1 | TPS11 (AHRD V1 ***- Q41336_SOLLC)                                                                                                                 | 0.72 | 1.75E-03 | Tps1                                                       |                                                            |
| Solyc11g069660.1 | Nbs-lrr, resistance protein                                                                                                                       | 0.72 | 1.39E-03 | Disease resistance partial                                 | GO:0005524; GO:0006915                                     |
| Solyc11g071850.1 | AT5G22070 protein (Fragment) (AHRD V1 ***- contains Interpro domain(s) IPR004949 Protein of unknown function DUF266, plant                        | 0.72 | 2.52E-04 | Unknown Protein                                            |                                                            |
| Solyc04g073970.2 | cDNA clone J033025P19 full insert sequence V1 ***- B7ERC6_ORYSJ)                                                                                  | 0.71 | 1.35E-03 | Unknown Protein                                            |                                                            |
| Solyc05g005000.2 | Lipase (AHRD V1 **** B6UAB9_MAIZE)                                                                                                                | 0.71 | 1.91E-03 | Unknown Protein                                            | GO:0004806                                                 |
| Solyc05g014540.2 | DNA polymerase alpha subunit B family V1 ***- D7KVM0_ARALY); contains Interpro domain(s) IPR016722 DNA polymerase alpha, subunit B                | 0.71 | 7.94E-04 | Dna polymerase alpha subunit b                             | GO:0046982; GO:0006260                                     |
| Solyc06g050840.2 | DNA binding protein (AHRD V1 ***-                                                                                                                 | 0.71 | 1.33E-03 | Transcription factor scream2                               | GO:0030528                                                 |
| Solyc07g018240.1 | Elongation of very long chain fatty protein 4 (AHRD V1 *-* B0W9Y0_CULQU); contains Interpro domain(s) IPR002076 GNS1/SUR4 membrane protein        | 0.71 | 7.92E-04 | Elongation of fatty acids protein 3                        | GO:0005515; GO:0009922; GO:0016021                         |
| Solyc01g112260.2 | Unknown Protein (AHRD V1)                                                                                                                         | 0.7  | 2.62E-03 | Unknown Protein                                            |                                                            |
| Solyc04g079340.2 | Os03g0859900 protein (Fragment) (AHRD V1 ***- contains Interpro domain(s) IPR006869 Protein of unknown function DUF547                            | 0.7  | 6.92E-04 | Unknown Protein                                            |                                                            |
| Solyc07g018300.2 | Single-stranded DNA binding protein p30 subunit V1 **** C5JUJ5_AJEDS); contains Interpro domain(s) IPR014646 Replication protein A, subunit RPA32 | 0.7  | 1.50E-03 | Replication protein a 32 kda subunit a                     | GO:0003676                                                 |
| Solyc07g042390.1 | Pectinesterase (AHRD V1 **** B7SIX2_9CONI); contains domain(s) IPR006501 Pectinesterase inhibitor                                                 | 0.7  | 1.31E-03 | Pectinesterase                                             | GO:0004857; GO:0030599                                     |
| Solyc10g081250.1 | DNA polymerase (AHRD V1 ***- C5Y6L0_SORBI); Interpro domain(s) IPR004578 DNA-directed DNA polymerase, family B, pol2                              | 0.7  | 1.36E-03 | Dna polymerase delta catalytic subunit                     | GO:0000166; GO:0003677; GO:0003887; GO:0005634; GO:0006260 |
| Solyc12g044310.1 | Solute carrier family 15 member 4 V1 ***- S15A4_XENLA); contains Interpro domain(s) IPR000109 TGF-beta receptor, type I/II extracellular region   | 0.7  | 1.57E-03 | Protein nrt1 ptr family                                    | GO:0016020                                                 |
| Solyc04g082110.2 | Rop guanine nucleotide exchange factor 1 V1 ***- ROGF1_ARATH); contains Interpro domain(s) IPR005512 Rop nucleotide exchanger, PRONE              | 0.69 | 2.01E-03 | Rop guanine nucleotide exchange factor 1-                  | GO:0005089                                                 |
| Solyc05g026240.1 | LRR receptor-like serine/threonine-protein kinase, RLP                                                                                            | 0.69 | 1.96E-03 | Leucine-rich repeat extensin-protein 4                     | GO:0005515; GO:0005199; GO:0004675                         |
| Solyc06g074850.2 | Serine carboxypeptidase (AHRD V1 **** Q2Z1Y2_PRUMU); Interpro domain(s) IPR001563 Peptidase S10, serine carboxypeptidase                          | 0.69 | 1.83E-03 | Serine carboxypeptidase                                    | GO:0004185; GO:0006508                                     |
| Solyc08g061560.2 | Receptor like kinase, RLK                                                                                                                         | 0.69 | 6.62E-04 | Lrr receptor-like serine threonine-protein kinase erecta   | GO:0005515; GO:0004675                                     |
| Solyc08g079650.2 | ACT domain containing protein expressed (AHRD **-- Q10P43_ORYSJ); contains Interpro domain(s) IPR002912 Amino acid-binding ACT                    | 0.69 | 7.23E-04 | Amino acid binding                                         | GO:0008152; GO:0016597                                     |
| Solyc09g011960.1 | Laccase (AHRD V1 ***- O24042_LIRTU); contains domain(s) IPR017761 Laccase                                                                         | 0.69 | 1.31E-03 | Laccase-17                                                 | GO:0016491                                                 |
| Solyc09g090020.2 | Germin-like protein 5 (AHRD V1 ***- contains Interpro domain(s) IPR014710 RmlC-like jelly roll fold                                               | 0.69 | 7.01E-04 | Germin-like protein subfamily 1 member 17                  | GO:0030145; GO:0048046                                     |
| Solyc10g005960.1 | Fasciclin-like arabinogalactan protein 10 (AHRD V1 A9XTL5_GOSHI); contains Interpro domain(s) IPR000782 FAS1 domain                               | 0.69 | 1.38E-03 | Fasciclin-like arabinogalactan protein 1                   |                                                            |
| Solyc01g102390.2 | Germin-like protein (AHRD V1 ***- O65358_SOLTU); Interpro domain(s) IPR014710 RmlC-like jelly roll fold                                           | 0.68 | 3.96E-04 | Nectarin-1                                                 | GO:0030145; GO:0048046                                     |

|                  |                                                                                                                                                                                          |      |          |                                                                       |                                    |
|------------------|------------------------------------------------------------------------------------------------------------------------------------------------------------------------------------------|------|----------|-----------------------------------------------------------------------|------------------------------------|
| Solyc02g024070.2 | Class III homeodomain-leucine zipper (AHRD V1 Q1WD30_GINBI); contains Interpro domain(s) IPR013978 MEKHLA                                                                                | 0.68 | 1.74E-03 | Homeobox-leucine zipper protein athb-14                               | GO:0003677; GO:0045449             |
| Solyc05g005170.2 | Polygalacturonase 2 (AHRD V1 ***- A8D0T9_ONCHC); Interpro domain(s) IPR012334 Pectin lyase fold                                                                                          | 0.68 | 4.73E-04 | Polygalacturonase                                                     | GO:0004650; GO:0005975             |
| Solyc06g068770.2 | Exostosin-like glycosyltransferase (AHRD V1 **-- A8I7L6_CHLRE); Interpro domain(s) IPR004263 Exostosin-like                                                                              | 0.68 | 9.54E-04 | Probable beta- -xylosyltransferase                                    | GO:0016020                         |
| Solyc07g008670.2 | AT1G74160 protein (Fragment) (AHRD V1 *-*)                                                                                                                                               | 0.68 | 1.71E-03 | Protein longifolia 1-                                                 |                                    |
| Solyc10g074920.1 | Mannan endo-1 4-beta-mannosidase (AHRD V1 ***- contains Interpro domain(s) IPR001547 Glycoside hydrolase, family 5                                                                       | 0.68 | 4.81E-04 | Mannan endo- -beta-mannosidase                                        | GO:0003824; GO:0005975; GO:0043169 |
| Solyc10g083670.1 | Cellulose synthase-like C2 glycosyltransferase family 2 V1 **-* A9RNK0_PHYPA); contains Interpro domain(s) IPR001173 Glycosyl transferase, family 2                                      | 0.68 | 2.58E-03 | Glucomannan 4-beta-mannosyltransferase 9                              | GO:0051753                         |
| Solyc01g096040.2 | Aspartic proteinase nepenthesin I (AHRD V1 A9ZMF9_NEPAL); contains Interpro domain(s) IPR001461 Peptidase A1                                                                             | 0.67 | 2.29E-03 | Protein aspartic protease in guard cell 2                             | GO:0004190; GO:0006508             |
| Solyc03g098290.2 | Sucrose synthase (AHRD V1 **** Q9FHU4_ARATH); Interpro domain(s) IPR012820 Sucrose synthase, plants and cyanobacteria                                                                    | 0.67 | 1.53E-03 | Sucrose synthase 6                                                    | GO:0009058                         |
| Solyc05g013690.2 | GDSL esterase/lipase At3g26430 (AHRD V1 ***- contains Interpro domain(s) IPR001087 Lipase, GDSL                                                                                          | 0.67 | 1.77E-03 | Gdsl esterase lipase at3g26430-                                       | GO:0006629; GO:0016788             |
| Solyc08g066490.2 | Receptor like kinase, RLK                                                                                                                                                                | 0.67 | 2.41E-03 | Probably inactive leucine-rich repeat receptor-like protein kinase    | GO:0004675; GO:0006468             |
| Solyc09g075360.2 | Endoglucanase 1 (AHRD V1 ***- B6U0P7_MAIZE); Interpro domain(s) IPR008928 Six-hairpin glycosidase-like IPR012341 Six-hairpin glycosidase IPR018221 Glycoside hydrolase, family 9, active | 0.67 | 2.64E-03 | Endoglucanase 17                                                      | GO:0004553; GO:0005975             |
| Solyc09g083400.2 | Os02g0200800 protein (Fragment) (AHRD V1 *-*) contains Interpro domain(s) IPR009675 Targeting for Xklp2                                                                                  | 0.67 | 2.72E-03 | Protein wvd2-like 1                                                   |                                    |
| Solyc11g072490.1 | Interactor of constitutive active ROPs 3 V1 ***- ICR3_ARATH)                                                                                                                             | 0.67 | 1.50E-03 | Interactor of constitutive active rops 3-like                         |                                    |
| Solyc01g098740.2 | Receptor protein kinase-like protein (AHRD V1 Q9LJU5_ARATH); contains Interpro domain(s) IPR002290 Serine/threonine protein kinase                                                       | 0.66 | 1.34E-03 | Pto-interacting protein 1                                             | GO:0004672; GO:0005524; GO:0006468 |
| Solyc01g110960.2 | Glutamic acid-rich protein (AHRD V1 ***-                                                                                                                                                 | 0.66 | 1.82E-03 | Prefoldin chaperone subunit family                                    |                                    |
| Solyc08g080720.2 | Selenoprotein H (AHRD V1 *-*) A8JGP7_CHLRE); Interpro domain(s) IPR011893 SelT/selW/selH selenoprotein                                                                                   | 0.66 | 2.87E-03 | Selenoprotein h                                                       | GO:0008430; GO:0045454             |
| Solyc09g082500.2 | Tesmin/TSO1-like CXC domain containing protein expressed V1 *--- Q10G99_ORYSJ); contains Interpro domain(s) IPR005172 Tesmin/TSO1-like, CXC                                              | 0.66 | 1.37E-03 | Protein tesmin tso1-like cxc 2                                        | GO:0003700                         |
| Solyc11g044940.1 | Pto-like, Serine/threonine kinase protein, resistance protein                                                                                                                            | 0.66 | 1.02E-03 | Serine threonine-protein kinase-like protein acr4                     | GO:0004672; GO:0005524; GO:0006468 |
| Solyc02g072240.2 | Cellulose synthase (AHRD V1 **** Q6J8W9_9ROSI); Interpro domain(s) IPR005150 Cellulose synthase                                                                                          | 0.65 | 3.92E-04 | Cellulose synthase a catalytic subunit 8                              | GO:0016020; GO:0016760; GO:0030244 |
| Solyc07g062680.1 | Transcription factor CYCLOIDEA (Fragment) (AHRD V1 CYCLD_ANTML); contains Interpro domain(s) IPR017887 Transcription factor TCP subgroup                                                 | 0.65 | 1.28E-03 | Transcription factor tcp4                                             | GO:0003700                         |
| Solyc09g011690.2 | Unknown Protein (AHRD V1)                                                                                                                                                                | 0.65 | 1.85E-03 | Unknown Protein                                                       |                                    |
| Solyc12g008490.1 | Ceramide glucosyltransferase (AHRD V1 ***- Q946Y1_GOSAR)                                                                                                                                 | 0.65 | 1.57E-03 | Nucleotide-diphospho-sugar transferases superfamily protein isoform 1 |                                    |
| Solyc02g084390.2 | Kinesin like protein (AHRD V1 *-*) contains Interpro domain(s) IPR001752 Kinesin, motor region                                                                                           | 0.64 | 1.45E-03 | Kinesin-like protein nack1                                            | GO:0003777; GO:0005524; GO:0007018 |
| Solyc03g096800.2 | At5g24290-like protein (Fragment) (AHRD V1 *-*) contains Interpro domain(s) IPR008217 Protein of unknown function DUF125, transmembrane                                                  | 0.64 | 1.69E-03 | Membrane protein of er body-like protein isoform                      |                                    |
| Solyc06g072700.2 | Metal ion binding protein (AHRD V1 B6U064_MAIZE); contains Interpro domain(s) IPR006121 Heavy metal transport/detoxification protein                                                     | 0.64 | 1.21E-03 | Neurofilament medium polypeptide                                      | GO:0030001; GO:0046872             |
| Solyc02g092670.1 | Subtilisin-like protease (AHRD V1 ***- A9XG40_TOBAC); Interpro domain(s) IPR015500 Peptidase S8, subtilisin-related                                                                      | 0.63 | 9.98E-04 | Subtilisin-like protease                                              | GO:0004252; GO:0006508             |
| Solyc12g088760.1 | Subtilisin-like protease (AHRD V1 **-- Q38708_ALNGL); Interpro domain(s) IPR015500 Peptidase S8, subtilisin-related                                                                      | 0.63 | 2.05E-03 | Subtilisin-like protease                                              | GO:0004252; GO:0042802; GO:0043086 |
| Solyc05g010400.2 | Receptor like kinase, RLK                                                                                                                                                                | 0.62 | 1.86E-03 | Protein nsp-interacting kinase 2                                      | GO:0004672; GO:0005524; GO:0006468 |

|                  |                                                                                                                                                                                    |      |          |                                                            |                                    |
|------------------|------------------------------------------------------------------------------------------------------------------------------------------------------------------------------------|------|----------|------------------------------------------------------------|------------------------------------|
| Solyc07g062580.2 | DnaJ homolog subfamily C member 7 V1 *--- B5X1N5_SALSA); contains Interpro domain(s) IPR015609 Molecular chaperone, heat shock protein, Hsp40, DnaJ                                | 0.62 | 2.59E-03 | Tpr repeat-containing thioredoxin ttl1                     | GO:0045454                         |
| Solyc09g011160.2 | Regulator of chromosome condensation RCC1 (AHRD *--- B8FLG8_DESAA); contains Interpro domain(s) IPR009091 Regulator of chromosome condensation/beta-lactamase-inhibitor protein II | 0.62 | 2.83E-03 | Ultraviolet-b receptor uvr8-like                           | GO:0003682; GO:0008536             |
| Solyc01g110580.2 | Auxin-induced SAUR-like protein (AHRD V1 **-- contains Interpro domain(s) IPR003676 Auxin responsive SAUR protein                                                                  | 0.61 | 2.73E-03 | Auxin-induced protein 15a                                  | GO:0005516                         |
| Solyc03g019890.2 | Beta-galactosidase (AHRD V1 ***- A2JGX1_SOLLC); contains domain(s) IPR001944 Glycoside hydrolase, family 35                                                                        | 0.61 | 2.77E-03 | Beta-galactosidase 10                                      | GO:0005975; GO:0005515             |
| Solyc04g078700.2 | Receptor-like protein kinase (AHRD V1 ***- contains Interpro domain(s) IPR002290 Serine/threonine protein kinase                                                                   | 0.61 | 2.21E-03 | Probable serine threonine-protein kinase                   | GO:0004672; GO:0005524; GO:0006468 |
| Solyc07g021700.2 | N-myc downstream regulated (Fragment) (AHRD V1 Q177C7_AEDAE); contains Interpro domain(s) IPR015511 Pollen specific protein SF21                                                   | 0.61 | 2.78E-03 | Pollen-specific protein sf21                               | GO:0005515                         |
| Solyc09g097890.2 | Membrane protein (AHRD V1 **-- B6ST21_MAIZE); Interpro domain(s) IPR006593 Cytochrome b561/ferric reductase transmembrane                                                          | 0.61 | 2.03E-03 | Cytochrome b561 and domon domain-containing protein        |                                    |
| Solyc04g009180.1 | TCP family transcription factor (AHRD V1 A6MCZ2_9ORYZ); contains Interpro domain(s) IPR005333 Transcription factor, TCP                                                            | 0.6  | 1.95E-03 | Transcription factor tcp7                                  | GO:0003700                         |
| Solyc05g009680.1 | Aspartic proteinase nepenthesin I (AHRD V1 A9ZMF9_NEPAL); contains Interpro domain(s) IPR001461 Peptidase A1                                                                       | 0.6  | 2.82E-03 | Protein aspartic protease in guard cell 1                  | GO:0004190; GO:0006508             |
| Solyc07g006710.1 | Pathogenesis-related protein PR-1 (AHRD V1 **-- contains Interpro domain(s) IPR002413 Ves allergen                                                                                 | 0.6  | 2.10E-03 | Pathogenesis-related protein pr-1                          | GO:0005515; GO:0005576             |
| Solyc10g086660.1 | Rop guanine nucleotide exchange factor 1 V1 ***- ROGF1_ARATH); contains Interpro domain(s) IPR005512 Rop nucleotide exchanger, PRONE                                               | 0.6  | 1.70E-03 | Rop guanine nucleotide exchange factor 7                   | GO:0005089                         |
| Solyc01g107650.2 | Receptor like kinase, RLK                                                                                                                                                          | 0.59 | 2.24E-03 | Probable lrr receptor-like serine threonine-protein kinase | GO:0004672; GO:0005524; GO:0006468 |
| Solyc03g110880.2 | DNA-directed RNA polymerase (AHRD V1 ***- contains Interpro domain(s) IPR015712 DNA-directed RNA polymerase, subunit 2                                                             | 0.59 | 2.81E-03 | Unknown Protein                                            | GO:0003677; GO:0003899; GO:0006350 |

**Supplementary Table 4.** List of differentially down-regulated genes identified by RNA-seq upon exposition of receiver plants to Sys-treated plants.

The table reports the locus id, the gene description, the log<sub>2</sub> of the fold change (log<sub>2</sub>FC), the FDR of the differential expression, the Best Blast Hit Descriptor and the GO IDs.

| Locus            | Gene Description (ITAG 2.5)                                                                                                                               | Log2FC | FDR      | Best Blast Hit Descriptor                         | GO ID                                          |
|------------------|-----------------------------------------------------------------------------------------------------------------------------------------------------------|--------|----------|---------------------------------------------------|------------------------------------------------|
| Solyc10g052580.1 | Auxin-induced SAUR-like protein (AHRD V1 ***- contains Interpro domain(s) IPR003676 Auxin responsive SAUR protein                                         | -9.82  | 5.51E-08 | Auxin-induced protein                             | GO:0005516                                     |
| Solyc06g035940.2 | Homeobox-leucine zipper protein PROTODERMAL FACTOR 2 V1 **** PDF2_ARATH); contains Interpro domain(s) IPR002913 Lipid-binding START                       | -9.14  | 2.60E-08 | Homeobox-leucine zipper protein anthocyaninless 2 | GO:0003677; GO:0045449                         |
| Solyc10g052570.1 | Auxin-responsive protein (AHRD V1 ***- A8IXW9_BRACM); Interpro domain(s) IPR003676 Auxin responsive SAUR protein                                          | -6.96  | 3.97E-05 | Auxin-induced protein 6b                          |                                                |
| Solyc04g052890.1 | Auxin-responsive protein (AHRD V1 ***- A8IXW9_BRACM); Interpro domain(s) IPR003676 Auxin responsive SAUR protein                                          | -6.68  | 7.83E-05 | Auxin-induced protein 6b                          |                                                |
| Solyc09g089490.2 | Proteinase inhibitor I (AHRD V1 ***- contains Interpro domain(s) IPR000864 Proteinase inhibitor I13, potato inhibitor I                                   | -6.36  | 7.82E-06 | Proteinase inhibitor i-b                          | GO:0004867; GO:0009611                         |
| Solyc02g083480.2 | Peroxidase (AHRD V1 ***- A9PGX3_POPTR); contains domain(s) IPR002016 Haem peroxidase, plant/fungal/bacterial                                              | -5.3   | 5.79E-07 | Peroxidase 64                                     | GO:0004601; GO:0006979; GO:0020037; GO:0055114 |
| Solyc12g006730.1 | Unknown Protein (AHRD V1)                                                                                                                                 | -5.02  | 2.91E-05 | Unknown Protein                                   |                                                |
| Solyc12g006750.1 | Unknown Protein (AHRD V1)                                                                                                                                 | -4.79  | 9.15E-05 | Unknown Protein                                   |                                                |
| Solyc02g005050.2 | Unknown Protein (AHRD V1)                                                                                                                                 | -4.77  | 6.65E-04 | Unknown Protein                                   |                                                |
| Solyc00g020540.1 | Aminotransferase-like protein (AHRD V1 *- *- Q6EQM2_ORYSJ); Interpro domain(s) IPR019557 Aminotransferase-like, plant mobile domain                       | -4.71  | 1.87E-04 | Unknown Protein                                   |                                                |
| Solyc09g018200.1 | Plant-specific domain TIGR01568 family protein (AHRD *- *- B6U561_MAIZE); contains Interpro domain(s) IPR006458 Protein of unknown function DUF623, plant | -4.58  | 1.02E-03 | Transcription repressor ofp1                      |                                                |
| Solyc05g051720.1 | Glutaredoxin (AHRD V1 ***- B9I9V9_POPTR); contains domain(s) IPR011905 Glutaredoxin-like, plant II                                                        | -4.57  | 5.01E-06 | Monothiol glutaredoxin-s1                         | GO:0045454                                     |
| Solyc07g044900.1 | Unknown Protein (AHRD V1)                                                                                                                                 | -4.24  | 9.24E-04 | Unknown Protein                                   |                                                |
| Solyc08g013950.1 | Unknown Protein (AHRD V1)                                                                                                                                 | -4.11  | 4.84E-06 | Unknown Protein                                   |                                                |
| Solyc07g052070.1 | Cytochrome P450                                                                                                                                           | -4.01  | 5.67E-04 | Cytochrome p450 cyp72a219                         |                                                |
| Solyc02g067750.2 | Carbonic anhydrase (AHRD V1 ***- B1VK36_SOLLIC); Interpro domain(s) IPR001765 Carbonic anhydrase                                                          | -3.85  | 9.09E-05 | Carbonic chloroplastic                            | GO:0004089; GO:0008270; GO:0015976             |
| Solyc02g061780.2 | NAC domain transcription factor (AHRD V1 Q5DM35_WHEAT); contains Interpro domain(s) IPR003441 No apical meristem (NAM) protein                            | -3.82  | 1.43E-25 | Nac domain-containing protein 94                  | GO:0003677; GO:0045449                         |
| Solyc04g011790.1 | Glutaredoxin (AHRD V1 **** B9I9V9_POPTR); contains domain(s) IPR011905 Glutaredoxin-like, plant II                                                        | -3.59  | 7.63E-06 | Monothiol glutaredoxin-s1                         | GO:0045454; GO:0008794                         |
| Solyc09g008750.1 | Unknown Protein (AHRD V1)                                                                                                                                 | -3.53  | 9.44E-09 | Vq motif-containing protein 29                    |                                                |
| Solyc04g071780.2 | Cytochrome P450                                                                                                                                           | -3.42  | 4.46E-09 | Cytochrome p450 71a1                              | GO:0004497; GO:0005506; GO:0020037             |
| Solyc02g079480.1 | FAD-binding domain-containing protein (AHRD V1 *- *- contains Interpro domain(s) IPR006094 FAD linked oxidase, N-terminal                                 | -3.35  | 1.31E-07 | Tetrahydrocannabinolic acid synthase              | GO:0016491; GO:0050660                         |
| Solyc09g097960.2 | Aldo/keto reductase family protein (AHRD V1 D7KWQ9_ARALY); contains Interpro domain(s) IPR001395 Aldo/keto reductase                                      | -3.34  | 3.91E-05 | Auxin-induced protein pcnt115                     | GO:0016491; GO:0055114                         |
| Solyc09g082810.2 | Unknown Protein (AHRD V1); contains Interpro IPR010800 Glycine rich                                                                                       | -3.28  | 3.53E-26 | S14981extensin class i (clone w1-8 l) - tomato    |                                                |
| Solyc05g051730.1 | Glutaredoxin (AHRD V1 **** B9I9V9_POPTR); contains domain(s) IPR011905 Glutaredoxin-like, plant II                                                        | -3.24  | 1.03E-04 | Monothiol glutaredoxin-s1                         | GO:0045454; GO:0008794                         |
| Solyc05g052400.2 | Laccase (AHRD V1 ***- Q9ZP47_POPTR); contains domain(s) IPR017761 Laccase                                                                                 | -3.16  | 3.00E-04 | Laccase-12                                        | GO:0016491                                     |
| Solyc02g071560.2 | Subtilisin-like protease (AHRD V1 ***- Q9FK77_ARATH); Interpro domain(s) IPR015500 Peptidase S8, subtilisin-related                                       | -3.08  | 2.23E-07 | Subtilisin-like protease                          | GO:0004252; GO:0042802; GO:0043086             |



|                  |                                                                                                                                                              |       |          |                                             |                                                |
|------------------|--------------------------------------------------------------------------------------------------------------------------------------------------------------|-------|----------|---------------------------------------------|------------------------------------------------|
| Solyc05g052670.1 | N-hydroxycinnamoyl/benzoyltransferase 1 (AHRD V1 **-- Q00M72_SOYBN); Interpro domain(s) IPR003480 Transferase                                                | -3    | 2.81E-19 | Uncharacterized acetyltransferase           | GO:0016747                                     |
| Solyc06g051860.1 | Inorganic phosphate transporter 6 (AHRD V1 Q5CC71_MAIZE); contains Interpro domain(s) IPR016196 Major facilitator superfamily, general substrate transporter | -2.92 | 6.22E-07 | Inorganic phosphate transporter 1-11        | GO:0005315; GO:0005515                         |
| Solyc05g012850.2 | Unknown Protein (AHRD V1)                                                                                                                                    | -2.91 | 4.69E-05 | Unknown Protein                             |                                                |
| Solyc12g057020.1 | Acetyl xylan esterase A (AHRD V1 D0TLQ4_9BACE); contains Interpro domain(s) IPR005181 Protein of unknown function DUF303, acylesterase putative              | -2.89 | 6.00E-05 | Probable carbohydrate esterase at4g34215    |                                                |
| Solyc02g071470.2 | 1-aminocyclopropane-1-carboxylate oxidase 1 (AHRD V1 *** contains Interpro domain(s) IPR005123 Oxoglutarate and iron-dependent oxygenase                     | -2.87 | 8.03E-08 | Protein srg1                                | GO:0016491                                     |
| Solyc03g116620.2 | Phospholipase D (AHRD V1 **** D2E4A5_9ROSI); Interpro domain(s) IPR011402 Phospholipase D, plant                                                             | -2.82 | 1.73E-04 | Phospholipase d alpha 1                     | GO:0005515; GO:0004630; GO:0008152             |
| Solyc08g080670.1 | Osmotin-like protein (Fragment) (AHRD V1 **-- contains Interpro domain(s) IPR001938 Thaumatin, pathogenesis-related                                          | -2.74 | 9.54E-04 | Osmotin-like protein                        | GO:0005515                                     |
| Solyc09g007010.1 | Pathogenesis related protein PR-1 (AHRD V1 Q9SC15_SOLTU); contains Interpro domain(s) IPR002413 Ves allergen                                                 | -2.74 | 2.62E-35 | Pathogenesis-related leaf protein 4         | GO:0005515; GO:0005576                         |
| Solyc12g094610.1 | U-box domain-containing protein 15 (AHRD V1 PUB15_ARATH); contains Interpro domain(s) IPR011989 Armadillo-like helical                                       | -2.73 | 2.93E-04 | U-box domain-containing protein 15          | GO:0005488                                     |
| Solyc07g052140.2 | (-)-germacrene D synthase (AHRD V1 *** contains Interpro domain(s) IPR005630 Terpene synthase, metal-binding domain                                          | -2.72 | 3.09E-08 | (-)-Germacrene d synthase-                  | GO:0016829                                     |
| Solyc03g033750.1 | BCS1 protein-like protein (AHRD V1 ***-                                                                                                                      | -2.65 | 1.45E-04 | Probable mitochondrial chaperone bcs1-a     |                                                |
| Solyc12g088240.1 | Cellulose synthase-like C1-1 glycosyltransferase family 2 (AHRD V1 ***- D8RV47_SELML); contains Interpro domain(s) IPR001173 Glycosyl transferase, family 2  | -2.62 | 1.63E-03 | Probable xyloglucan glycosyltransferase 12  |                                                |
| Solyc02g032660.2 | MATE efflux family protein expressed (AHRD **-- Q10HY1_ORYSJ); contains Interpro domain(s) IPR002528 Multi antimicrobial extrusion protein MatE              | -2.6  | 6.09E-10 | Protein transparent testa 12-like           | GO:0006855; GO:0015238; GO:0015297; GO:0016020 |
| Solyc08g080640.1 | Osmotin-like protein (Fragment) (AHRD V1 **-- contains Interpro domain(s) IPR017949 Thaumatin, conserved site IPR001938 Thaumatin, pathogenesis-related      | -2.58 | 6.39E-19 | Osmotin-like protein                        | GO:0005515                                     |
| Solyc08g080650.1 | Osmotin-like protein (Fragment) (AHRD V1 **-- contains Interpro domain(s) IPR001938 Thaumatin, pathogenesis-related                                          | -2.53 | 2.63E-25 | Osmotin-like protein                        | GO:0005515                                     |
| Solyc01g103920.2 | Ferredoxin I (AHRD V1 ***- Q93XJ9_SOLTU); Interpro domain(s) IPR010241 Ferredoxin [2Fe-2S], plant                                                            | -2.52 | 8.06E-07 | Ferredoxin                                  | GO:0005515; GO:0051536                         |
| Solyc00g174340.1 | Pathogenesis-related protein 1b (AHRD V1 ***- contains Interpro domain(s) IPR018244 Allergen V5/Tpx-1 related, conserved site                                | -2.51 | 5.88E-27 | Unknown Protein                             | GO:0005515; GO:0005576                         |
| Solyc05g009170.1 | Zinc finger protein 6 (AHRD V1 B6T066_MAIZE); contains Interpro domain(s) IPR007087 Zinc finger, C2H2-type                                                   | -2.49 | 6.69E-05 | Zinc finger protein 6                       | GO:0005622; GO:0008270                         |
| Solyc07g044910.1 | Unknown Protein (AHRD V1)                                                                                                                                    | -2.49 | 1.79E-03 | Unknown Protein                             |                                                |
| Solyc02g086700.2 | Beta-1 3-glucanase (AHRD V1 ***- Q9SYX6_TOBAC); Interpro domain(s) IPR000490 Glycoside hydrolase, family 17                                                  | -2.47 | 2.51E-16 | Glucan endo- -beta-glucosidase              | GO:0003824; GO:0005975; GO:0043169             |
| Solyc09g059220.1 | Unknown Protein (AHRD V1)                                                                                                                                    | -2.44 | 2.02E-03 | Unknown Protein                             |                                                |
| Solyc07g049530.2 | 1-aminocyclopropane-1-carboxylate oxidase (AHRD V1 ***- Q94F66_SOLTU); Interpro domain(s) IPR005123 Oxoglutarate and iron-dependent oxygenase                | -2.4  | 6.25E-28 | 1-aminocyclopropane-1-carboxylate oxidase 1 | GO:0016491                                     |
| Solyc08g080620.1 | Osmotin-like protein (Fragment) (AHRD V1 **-- contains Interpro domain(s) IPR017949 Thaumatin, conserved site IPR001938 Thaumatin, pathogenesis-related      | -2.38 | 6.10E-06 | Osmotin-like protein                        | GO:0005515                                     |
| Solyc12g042010.1 | Unknown Protein (AHRD V1); contains Interpro IPR011598 Helix-loop-helix DNA-binding                                                                          | -2.37 | 2.77E-05 | Transcription factor ibh1                   | GO:0005634; GO:0030528; GO:0045449             |
| Solyc09g010990.2 | Laccase (AHRD V1 ***- O24044_LIRTU); contains domain(s) IPR017761 Laccase                                                                                    | -2.35 | 1.14E-04 | Laccase-17                                  | GO:0016491                                     |
| Solyc11g069700.1 | Elongation factor 1-alpha (AHRD V1 ***- contains Interpro domain(s) IPR004539 Translation elongation factor EF1A, eukaryotic and archaeal                    | -2.35 | 6.03E-12 | Elongation factor 1-alpha                   | GO:0003746; GO:0005525; GO:0005737; GO:0006414 |
| Solyc08g081470.2 | Nitrilase-associated protein (AHRD V1 *- B6SPJ4_MAIZE)                                                                                                       | -2.33 | 6.95E-06 | Protein spiral1                             |                                                |
| Solyc00g174330.2 | Pathogenesis related protein PR-1 (AHRD V1 Q9SC15_SOLTU); contains Interpro domain(s) IPR001283 Allergen V5/Tpx-1 related                                    | -2.32 | 7.49E-22 | Unknown Protein                             | GO:0005576                                     |

|                  |                                                                                                                                                                                  |       |          |                                                                      |                                    |
|------------------|----------------------------------------------------------------------------------------------------------------------------------------------------------------------------------|-------|----------|----------------------------------------------------------------------|------------------------------------|
| Solyc07g064650.1 | Arabidopsis thaliana genomic DNA chromosome 5 clone MOK16 (AHRD V1 *--- Q9LYW2_ARATH); contains Interpro domain(s) IPR007608 Protein of unknown function                         | -2.31 | 1.46E-03 | Phospholipase d c                                                    | GO:0005515                         |
| Solyc04g072700.2 | Metal ion binding protein (AHRD V1 B6U811_MAIZE); contains Interpro domain(s) IPR006121 Heavy metal transport/detoxification protein                                             | -2.3  | 1.78E-08 | Heavy metal-associated isoprenylated plant protein 26                | GO:0030001; GO:0046872             |
| Solyc02g082920.2 | Endochitinase (Chitinase) (AHRD V1 **** Q43184_SOLTU); Interpro domain(s) IPR000726 Glycoside hydrolase, family 19, catalytic                                                    | -2.29 | 1.66E-19 | Class ii chitinase                                                   | GO:0004568; GO:0006032; GO:0016998 |
| Solyc01g105810.2 | Rab-GDP dissociation inhibitor (AHRD V1 **** contains Interpro domain(s) IPR00806 Rab GDI protein                                                                                | -2.27 | 1.36E-03 | Guanosine nucleotide diphosphate dissociation inhibitor              | GO:0005093; GO:0015031             |
| Solyc09g089930.1 | Ethylene responsive transcription factor 1a (AHRD *-** C0J9I9_9ROSA); contains Interpro domain(s) IPR001471 Pathogenesis-related transcriptional factor and ERF, DNA-binding     | -2.27 | 1.59E-16 | Ethylene-responsive transcription factor 1b                          | GO:0003700; GO:0006355             |
| Solyc02g064690.2 | Acetyltransferase-like protein (AHRD V1 ***- Q7EYF5_ORYSJ); Interpro domain(s) IPR000182 GCN5-related N-acetyltransferase                                                        | -2.26 | 3.36E-09 | Probable n-acetyltransferase hls1                                    | GO:0008152                         |
| Solyc09g008760.1 | Unknown Protein (AHRD V1); contains Interpro IPR008889 VQ                                                                                                                        | -2.24 | 1.12E-06 | Serine arginine repetitive matrix protein 2                          |                                    |
| Solyc11g066270.1 | Xyloglucan endotransglucosylase/hydrolase 9 (AHRD V1 ***- contains Interpro domain(s) IPR016455 Xyloglucan endotransglucosylase/hydrolase                                        | -2.24 | 1.23E-04 | Probable xyloglucan endotransglucosylase hydrolase protein 31        | GO:0004553; GO:0005975             |
| Solyc03g098760.1 | Kunitz-type protease inhibitor-like protein (AHRD V1 Q2XPY0_SOLTU); contains Interpro domain(s) IPR011065 Kunitz inhibitor ST1-like                                              | -2.17 | 1.28E-03 | Kunitz-type inhibitor b                                              | GO:0004866                         |
| Solyc12g013830.1 | Unknown Protein (AHRD V1)                                                                                                                                                        | -2.16 | 1.38E-04 | Unknown Protein                                                      |                                    |
| Solyc01g087810.2 | Subtilisin-like protease (AHRD V1 ***- O82777_SOLLC); Interpro domain(s) IPR015500 Peptidase S8, subtilisin-related                                                              | -2.14 | 8.52E-18 | Subtilisin-like protease                                             | GO:0006508                         |
| Solyc02g061770.2 | Endochitinase (Chitinase) (AHRD V1 **** Q43184_SOLTU); Interpro domain(s) IPR000726 Glycoside hydrolase, family 19, catalytic                                                    | -2.14 | 7.08E-04 | Basic endochitinase                                                  | GO:0004568; GO:0006032; GO:0016998 |
| Solyc09g005730.2 | Plant-specific domain TIGR01589 family protein (AHRD ***- B4FFL2_MAIZE); contains Interpro domain(s) IPR006476 Conserved hypothetical protein CHP01589, plant                    | -2.14 | 1.89E-06 | Math and Irr domain-containing protein                               |                                    |
| Solyc07g008520.2 | Peptide transporter (AHRD V1 ***- Q48542_HORVU); Interpro domain(s) IPR000109 TGF-beta receptor, type I/II extracellular region                                                  | -2.12 | 1.27E-05 | Protein nrt1 ptr family                                              | GO:0016020; GO:0042936             |
| Solyc01g087820.2 | Subtilisin-like protease (AHRD V1 ***- O82777_SOLLC); Interpro domain(s) IPR015500 Peptidase S8, subtilisin-related IPR000209 Peptidase S8 and S53, subtilisin, kexin, sedolisin | -2.11 | 3.34E-19 | Subtilisin-like protease                                             | GO:0004252; GO:0042802; GO:0043086 |
| Solyc03g025670.2 | PAR-1c protein (AHRD V1 ***- Q43589_TOBAC); Interpro domain(s) IPR009489 PAR1                                                                                                    | -2.1  | 5.24E-18 | Unknown Protein                                                      |                                    |
| Solyc10g044680.1 | Myb-like transcription factor (AHRD V1 ***- contains Interpro domain(s) IPR015495 Myb transcription factor                                                                       | -2.09 | 4.37E-04 | Transcription factor myb86                                           | GO:0003677                         |
| Solyc01g087840.2 | Subtilisin-like protease (AHRD V1 ***- O82006_SOLLC); Interpro domain(s) IPR015500 Peptidase S8, subtilisin-related                                                              | -2.08 | 3.83E-09 | Subtilisin-like protease                                             | GO:0004252; GO:0042802; GO:0043086 |
| Solyc10g075150.1 | Non-specific lipid-transfer protein (AHRD V1 **** contains Interpro domain(s) IPR013770 Plant lipid transfer protein and hydrophobic protein, helical                            | -2.08 | 2.09E-23 | Non-specific lipid-transfer protein 2                                | GO:0006869                         |
| Solyc01g081170.1 | Beta-glucosidase (AHRD V1 ***- B5U9B3_9BIVA); contains domain(s) IPR001360 Glycoside hydrolase, family 1                                                                         | -2.07 | 2.69E-04 | Beta-glucosidase 11                                                  | GO:0003824; GO:0005975; GO:0043169 |
| Solyc03g119390.2 | Transcription factor (AHRD V1 *** D6MKM4_9ASPA); Interpro domain(s) IPR011598 Helix-loop-helix DNA-binding                                                                       | -2.01 | 2.08E-04 | Transcription factor bee 1                                           | GO:0005634; GO:0030528; GO:0045449 |
| Solyc04g040180.2 | S-adenosylmethionine-dependent methyltransferase (Fragment) (AHRD V1 **** contains Interpro domain(s) IPR013217 Methyltransferase type 12                                        | -2.01 | 3.00E-04 | Methyltransferase                                                    | GO:0008757                         |
| Solyc11g005480.1 | Citrate binding protein (AHRD V1 ***- contains Interpro domain(s) IPR014895 Alginate lyase 2                                                                                     | -2    | 2.23E-03 | Citrate-binding                                                      |                                    |
| Solyc01g008620.2 | Beta-1 3-glucanase (AHRD V1 ***- Q9SYX6_TOBAC); Interpro domain(s) IPR000490 Glycoside hydrolase, family 17                                                                      | -1.98 | 1.25E-14 | 3)-beta-glucan endohydrolase short                                   | GO:0003824; GO:0005975; GO:0043169 |
| Solyc03g120110.2 | Serine/threonine kinase receptor (AHRD V1 **** contains Interpro domain(s) IPR002290 Serine/threonine protein kinase                                                             | -1.98 | 2.03E-06 | G-type lectin s-receptor-like serine threonine-protein kinase ces101 | GO:0004672; GO:0005524; GO:0006468 |

|                  |                                                                                                                                                                       |       |          |                                                               |                                                |
|------------------|-----------------------------------------------------------------------------------------------------------------------------------------------------------------------|-------|----------|---------------------------------------------------------------|------------------------------------------------|
| Solyc08g006470.2 | Zinc finger family protein (AHRD V1 D7MB67_ARALY); contains Interpro domain(s) IPR007087 Zinc finger, C2H2-type                                                       | -1.98 | 6.07E-06 | Zinc finger protein 622                                       | GO:0005622; GO:0008270                         |
| Solyc10g055820.1 | Chitinase (AHRD V1 ***- B9VRK7_CAPAN); contains domain(s) IPR000726                                                                                                   | -1.98 | 3.85E-05 | Endochitinase 3                                               | GO:0004568; GO:0006032; GO:0016998             |
| Solyc01g081160.2 | Glycoside hydrolase, family 19, catalytic Beta-glucosidase (AHRD V1 **** D3YJ59_VITVI); contains domain(s) IPR001360                                                  | -1.97 | 9.29E-04 | Beta-glucosidase 11-like                                      | GO:0003824; GO:0005975; GO:0043169             |
| Solyc04g050620.2 | Glycoside hydrolase, family 1 Cytochrome P450                                                                                                                         | -1.97 | 3.37E-07 | Cytochrome p450 cyp736a12                                     |                                                |
| Solyc11g032220.1 | NADPH dehydrogenase 1 (AHRD V1 ***- contains Interpro domain(s) IPR001155 NADH:flavin oxidoreductase/NADH oxidase, N-terminal                                         | -1.97 | 7.62E-10 | 12-oxophytodienoate reductase 11                              | GO:0010181; GO:0016491                         |
| Solyc06g008620.1 | Protein tolB (AHRD V1 *-*- D3SF14_THISK); Interpro domain(s) IPR011042 Six-bladed beta-propeller, TolB-like                                                           | -1.95 | 7.59E-11 | Protein tolB                                                  |                                                |
| Solyc02g079710.2 | Serine/threonine kinase receptor (AHRD V1 **** contains Interpro domain(s) IPR002290 Serine/threonine protein kinase                                                  | -1.93 | 4.36E-04 | G-type lectin s-receptor-like serine threonine-protein kinase | GO:0048544                                     |
| Solyc04g007980.2 | 1-aminocyclopropane-1-carboxylate oxidase (AHRD V1 **-* B6SUN2_MAIZE); Interpro domain(s) IPR005123 Oxoglutarate and iron-dependent oxygenase                         | -1.93 | 2.18E-15 | 1-aminocyclopropane-1-carboxylate oxidase homolog 4           | GO:0016491                                     |
| Solyc09g010160.1 | NAC domain protein IPR003441 (AHRD V1 B9IIS2_POPTR); contains Interpro domain(s) IPR003441 No apical meristem (NAM) protein                                           | -1.92 | 4.46E-06 | Nac domain-containing protein 90                              | GO:0003677; GO:0045449                         |
| Solyc03g020010.1 | Kunitz-type trypsin inhibitor alpha chain (AHRD **** ID5A_PROJU); contains Interpro domain(s) IPR002160 Proteinase inhibitor I3, Kunitz legume                        | -1.91 | 1.56E-03 | Miraculin                                                     | GO:0004866; GO:0004867; GO:0015066             |
| Solyc07g008210.2 | TPR domain protein (AHRD V1 *-*- contains Interpro domain(s) IPR011990                                                                                                | -1.91 | 5.78E-09 | Tetratricopeptide repeat-superfamily                          | GO:0005488                                     |
| Solyc08g005510.1 | Tir-nbs-lrr, resistance protein                                                                                                                                       | -1.89 | 5.15E-05 | Tmv resistance protein                                        | GO:0004888; GO:0007165; GO:0031224; GO:0045087 |
| Solyc09g090970.2 | Major allergen Mal d 1 (AHRD ***- Q84LA7_MALDO); contains Interpro domain(s) IPR000916 Bet v I allergen                                                               | -1.89 | 2.43E-04 | Pathogenesis-related protein sth-2                            | GO:0006952; GO:0009607                         |
| Solyc05g053600.2 | ATP-binding cassette transporter (AHRD V1 ***- contains Interpro domain(s) IPR013525 ABC-2 type transporter                                                           | -1.88 | 8.93E-09 | Pleiotropic drug resistance protein 1                         | GO:0016020                                     |
| Solyc03g098480.1 | Unknown Protein (AHRD V1)                                                                                                                                             | -1.85 | 2.74E-06 | Unknown Protein                                               |                                                |
| Solyc05g008250.1 | Myb-like transcription factor 6 (AHRD V1 Q8H256_GOSHI); contains Interpro domain(s) IPR015495 Myb transcription factor                                                | -1.83 | 3.48E-08 | Transcription factor myb3                                     | GO:0003700; GO:0045449                         |
| Solyc05g009040.2 | Receptor-like protein kinase (AHRD V1 ***- contains Interpro domain(s) IPR002290 Serine/threonine protein kinase                                                      | -1.83 | 2.79E-04 | Probable receptor-like protein kinase                         | GO:0004672; GO:0005524; GO:0006468             |
| Solyc10g075090.1 | Non-specific lipid-transfer protein (AHRD V1 **** contains Interpro domain(s) IPR013770 Plant lipid transfer protein and hydrophobic protein, helical                 | -1.83 | 5.89E-19 | Non-specific lipid-transfer protein 2                         | GO:0006869                                     |
| Solyc12g011150.1 | Unknown Protein (AHRD V1)                                                                                                                                             | -1.82 | 5.28E-08 | Unknown Protein                                               |                                                |
| Solyc02g068170.1 | Unknown Protein (AHRD V1)                                                                                                                                             | -1.81 | 6.04E-05 | Unknown Protein                                               |                                                |
| Solyc03g118850.2 | Hydrolase alpha/beta fold family (AHRD V1 Q1DF33_MYXXD)                                                                                                               | -1.81 | 5.06E-04 | Unknown Protein                                               | GO:0004252; GO:0006508                         |
| Solyc10g085880.1 | UDP-glucosyltransferase family 1 protein (AHRD V1 C6KI43_CITSI); contains Interpro domain(s) IPR002213 UDP-glucuronosyl/UDP-glucosyltransferase                       | -1.81 | 3.93E-06 | Udp-glycosyltransferase 73c3                                  | GO:0008152; GO:0016758                         |
| Solyc01g067460.1 | Glutaredoxin family protein (AHRD V1 ****- contains Interpro domain(s) IPR011905 Glutaredoxin-like, plant II                                                          | -1.8  | 6.90E-13 | Monothiol glutaredoxin-s2                                     | GO:0045454                                     |
| Solyc02g072550.1 | DOG1 alpha splice variant (Fragment) (AHRD ***- A0SVJ8_ARATH)                                                                                                         | -1.8  | 1.39E-03 | Transcription factor hbp-1b                                   |                                                |
| Solyc07g055560.2 | G-type lectin S-receptor-like serine/threonine-protein kinase At2g19130 V1 *--- Y2913_ARATH); contains Interpro domain(s) IPR002401 Cytochrome P450, E-class, group I | -1.8  | 4.52E-07 | Cytochrome p450 cyp72a219                                     | GO:0004672; GO:0005524; GO:0006468             |
| Solyc01g100490.2 | Nicotianamine synthase (AHRD V1 ***- A3DUI9_MALXI); Interpro domain(s) IPR004298 Nicotianamine synthase                                                               | -1.79 | 8.74E-07 | Nicotianamine synthase                                        | GO:0030410; GO:0030418                         |
| Solyc07g062480.1 | S-locus glycoprotein (Fragment) (AHRD V1 *--- contains Interpro domain(s) IPR001480 Curculin-like (mannose-binding) lectin                                            | -1.79 | 3.96E-05 | Epidermis-specific secreted glycoprotein ep1                  | GO:0005529                                     |
| Solyc07g055840.2 | Citrate synthase (AHRD V1 **** B9IFM7_POPTR); Interpro domain(s) IPR010953 Citrate synthase, type II                                                                  | -1.78 | 4.66E-07 | Citrate glyoxysomal                                           | GO:0044262; GO:0046912                         |
| Solyc08g078760.1 | AT5g47580/MNJ7_17 (AHRD V1 ***- Q9FGJ9_ARATH)                                                                                                                         | -1.78 | 3.19E-11 | Unknown Protein                                               |                                                |

|                  |                                                                                                                                                                               |       |          |                                                          |                                                |
|------------------|-------------------------------------------------------------------------------------------------------------------------------------------------------------------------------|-------|----------|----------------------------------------------------------|------------------------------------------------|
| Solyc07g053890.2 | O-acyltransferase WSD1 (AHRD V1 **-- WSD1_ARATH); Interpro domain(s) IPR009721 Protein of unknown function DUF1298                                                            | -1.76 | 2.18E-09 | O-acyltransferase wsd1                                   |                                                |
| Solyc01g107780.2 | UDP-glucosyltransferase family 1 protein (AHRD V1 C6K143_CITSI); contains Interpro domain(s) IPR002213 UDP-glucuronosyl/UDP-glucosyltransferase                               | -1.75 | 3.78E-08 | Scopoletin glucosyltransferase                           | GO:0008152; GO:0016758                         |
| Solyc06g050790.2 | Amino acid transporter (AHRD V1 **** contains Interpro domain(s) IPR013057 Amino acid transporter, transmembrane                                                              | -1.75 | 2.39E-05 | Sodium-coupled neutral amino acid transporter 7          | GO:0015171                                     |
| Solyc10g055800.1 | Chitinase (AHRD V1 ***- B9VRK7_CAPAN); contains domain(s) IPR016283 Glycoside hydrolase, family 19                                                                            | -1.75 | 4.50E-11 | Endochitinase 4                                          | GO:0008061                                     |
| Solyc03g121010.2 | Unknown Protein (AHRD V1)                                                                                                                                                     | -1.74 | 7.10E-04 | Unknown Protein                                          |                                                |
| Solyc04g005810.2 | Thioredoxin H (AHRD V1 ***- Q4U0W0_NICAL); Interpro domain(s) IPR015467 Thioredoxin, core                                                                                     | -1.74 | 9.91E-05 | Thioredoxin h2                                           | GO:0045454                                     |
| Solyc08g079900.1 | Subtilisin-like protease (AHRD V1 ***- Q9LWA4_SOLLC); Interpro domain(s) IPR015500 Peptidase S8, subtilisin-related                                                           | -1.74 | 1.99E-07 | Subtilisin-like protease                                 | GO:0004252; GO:0006508                         |
| Solyc03g033840.2 | 26S protease regulatory subunit 6B homolog V1 *--- PRS6B_ASPNG); contains Interpro domain(s) IPR003959 ATPase, AAA-type, core                                                 | -1.73 | 8.35E-08 | Probable mitochondrial chaperone bcs1-a                  | GO:0005524                                     |
| Solyc04g079030.2 | Anthocyanidin 3-O-glucosyltransferase (AHRD V1 *- B6TRK5_MAIZE); Interpro domain(s) IPR002213 UDP-glucuronosyl/UDP-glucosyltransferase                                        | -1.73 | 3.61E-05 | Udp-glycosyltransferase 79b6                             | GO:0008152; GO:0016758                         |
| Solyc11g065940.1 | Epsin 2-like protein (Fragment) (AHRD V1 D9HX40_LAGLG); contains Interpro domain(s) IPR001026 Epsin, N-terminal                                                               | -1.73 | 1.15E-15 | Enth vhs family protein                                  | GO:0005488                                     |
| Solyc01g106820.2 | Peptidase M50 family (AHRD V1 ***-                                                                                                                                            | -1.72 | 9.42E-07 | Probable zinc metallopeptidase chloroplastic             |                                                |
| Solyc04g079470.2 | Serpin (Serine protease inhibitor) (AHRD V1 Q53P13_ORYSJ); contains Interpro domain(s) IPR015554 Protease inhibitor I4, serpin, plant                                         | -1.72 | 2.38E-03 | Serpin-zx                                                | GO:0004867                                     |
| Solyc10g080670.1 | Unknown Protein (AHRD V1)                                                                                                                                                     | -1.72 | 9.50E-12 | Unknown Protein                                          |                                                |
| Solyc02g077040.2 | Cathepsin B-like cysteine proteinase 5 (AHRD **-* CPR5_CAEEL); contains Interpro domain(s) IPR013128 Peptidase C1A, papain                                                    | -1.71 | 4.67E-14 | Senescence-specific cysteine protease sag39              | GO:0004197; GO:0006508                         |
| Solyc10g055810.1 | Endochitinase (Chitinase) (AHRD V1 **** Q43184_SOLTU); Interpro domain(s) IPR016283 Glycoside hydrolase, family 19 IPR018371 Chitin-binding, type 1, conserved site IPR000726 | -1.71 | 8.38E-14 | Endochitinase 4                                          | GO:0004568; GO:0006032; GO:0016998             |
| Solyc01g006550.2 | LRR receptor-like serine/threonine-protein kinase, RLP                                                                                                                        | -1.7  | 3.94E-09 | Receptor-like protein 12                                 | GO:0005515                                     |
| Solyc08g007430.1 | Nitrate transporter (AHRD V1 **** Q852P5_TOBAC); Interpro domain(s) IPR000109 TGF-beta receptor, type I/II extracellular region                                               | -1.7  | 2.43E-03 | Protein nrt1 ptr family                                  | GO:0016020; GO:0042936                         |
| Solyc02g036480.1 | Harpin-induced protein-like (Fragment) (AHRD V1 **-- contains Interpro domain(s) IPR010847 Harpin-induced 1                                                                   | -1.69 | 1.79E-03 | Protein yls9                                             |                                                |
| Solyc05g052280.2 | Peroxidase (AHRD V1 ***- B9VRK9_CAPAN); contains domain(s) IPR002016 Haem peroxidase, plant/fungal/bacterial                                                                  | -1.69 | 1.69E-06 | Peroxidase p7                                            | GO:0004601; GO:0006979; GO:0020037; GO:0055114 |
| Solyc11g044440.1 | Serine/threonine-protein phosphatase 7 long form homolog V1 **-- PPP7L_ARATH); contains Interpro domain(s) IPR019557 Aminotransferase-like, plant mobile domain               | -1.69 | 6.71E-05 | Serine threonine-protein phosphatase 7 long form homolog |                                                |
| Solyc12g042480.1 | Cytochrome P450                                                                                                                                                               | -1.69 | 5.22E-10 | Cytochrome p450                                          |                                                |
| Solyc01g010480.2 | Potassium voltage-gated channel subfamily H member (AHRD V1 *--- KCNH8_HUMAN); contains Interpro domain(s) IPR013767 PAS fold                                                 | -1.67 | 7.29E-11 | Protein twin lov 1                                       | GO:0000155; GO:0000160                         |
| Solyc08g005890.2 | Hydroxycinnamoyl transferase (AHRD V1 **-* D2XJ64_9MAGN); Interpro domain(s) IPR003480 Transferase                                                                            | -1.66 | 2.97E-04 | Uncharacterized acetyltransferase                        | GO:0016747                                     |
| Solyc09g057960.1 | Cysteine-rich receptor-like protein kinase (AHRD V1 C6ZRS1_SOYBN); contains Interpro domain(s) IPR002902 Protein of unknown function DUF26                                    | -1.66 | 2.52E-04 | Cysteine-rich repeat secretory protein 55                |                                                |
| Solyc01g094140.2 | Cytochrome P450                                                                                                                                                               | -1.64 | 1.03E-03 | Cytochrome p450 704c1                                    | GO:0004497; GO:0005506; GO:0020037; GO:0055114 |
| Solyc01g097270.2 | Chitinase (Fragment) (AHRD V1 *--- Q38777_ALLSA); Interpro domain(s) IPR000726 Glycoside hydrolase, family 19, catalytic IPR001153 Barwin                                     | -1.64 | 7.89E-12 | Wound-induced protein win2                               | GO:0008061                                     |
| Solyc04g080650.2 | Cytochrome P450                                                                                                                                                               | -1.64 | 7.72E-04 | Abscisic acid 8 -hydroxylase 2                           | GO:0004497; GO:0005506; GO:0020037             |
| Solyc01g098590.2 | Phosphoglycerate mutase family protein (AHRD V1 C1DZH2_9CHLO); contains Interpro domain(s) IPR013078 Phosphoglycerate mutase                                                  | -1.63 | 1.40E-12 | Broad-range acid phosphatase det1                        | GO:0003824; GO:0008152                         |

|                  |                                                                                                                                                                                  |       |          |                                                            |                                                |
|------------------|----------------------------------------------------------------------------------------------------------------------------------------------------------------------------------|-------|----------|------------------------------------------------------------|------------------------------------------------|
| Solyc00g282510.1 | Phenylalanine ammonia-lyase (AHRD V1 ***- B5LAW0_CAPAN); Interpro domain(s) IPR005922 Phenylalanine ammonia-lyase                                                                | -1.62 | 5.16E-05 | Unknown Protein                                            | GO:0005737; GO:0006559; GO:0016841             |
| Solyc00g201160.2 | Receptor protein kinase (AHRD V1 **** contains Interpro domain(s) IPR002290 Serine/threonine protein kinase                                                                      | -1.61 | 1.84E-03 | Unknown Protein                                            | GO:0004674; GO:0006468                         |
| Solyc10g080230.1 | DNA binding protein-like (AHRD V1 ***- contains Interpro domain(s) IPR005516 Remorin, C-terminal region                                                                          | -1.61 | 1.72E-05 | Gata zinc finger domain-containing protein 8               |                                                |
| Solyc01g009690.1 | LRR receptor-like serine/threonine-protein kinase, RLP                                                                                                                           | -1.59 | 1.95E-05 | Receptor-like protein 12                                   | GO:0005515                                     |
| Solyc01g096320.2 | Homeobox leucine zipper protein (AHRD V1 Q9XH73_PRUAR); contains Interpro domain(s) IPR001356 Homeobox                                                                           | -1.59 | 1.66E-05 | Homeobox-leucine zipper protein athb-12                    | GO:0003677; GO:0045449                         |
| Solyc02g068830.1 | Receptor like kinase, RLK                                                                                                                                                        | -1.59 | 1.38E-07 | Probable lrr receptor-like serine threonine-protein kinase | GO:0004672; GO:0005524; GO:0006468             |
| Solyc06g054570.1 | Glutaredoxin family protein (AHRD V1 ***- contains Interpro domain(s) IPR011905 Glutaredoxin-like, plant II                                                                      | -1.59 | 7.18E-04 | Monothiol glutaredoxin-s4                                  | GO:0045454                                     |
| Solyc06g069070.1 | Lipid transfer protein (AHRD V1 ***- contains Interpro domain(s) IPR013770 Plant lipid transfer protein and hydrophobic protein, helical                                         | -1.58 | 2.57E-08 | Non-specific lipid-transfer protein 2                      | GO:0006869                                     |
| Solyc07g043250.1 | Unknown Protein (AHRD V1); contains Interpro IPR008889 VQ                                                                                                                        | -1.58 | 5.61E-05 | Unknown Protein                                            |                                                |
| Solyc08g077370.2 | Purine permease family protein (AHRD V1 D7MCV2_ARALY); contains Interpro domain(s) IPR004853 Protein of unknown function DUF250                                                  | -1.58 | 1.03E-03 | Probable purine permease 11                                | GO:0005345                                     |
| Solyc10g075070.1 | Non-specific lipid-transfer protein (AHRD V1 ***- contains Interpro domain(s) IPR013770 Plant lipid transfer protein and hydrophobic protein, helical                            | -1.58 | 5.20E-10 | Non-specific lipid-transfer protein 2                      | GO:0006869                                     |
| Solyc02g089490.2 | Unknown Protein (AHRD V1)                                                                                                                                                        | -1.57 | 1.82E-03 | Unknown Protein                                            |                                                |
| Solyc12g089130.1 | CRAL/TRIO domain containing protein expressed (AHRD **-- Q75GU9_ORYSJ); contains Interpro domain(s) IPR001251 Cellular retinaldehyde-binding/triple function, C-terminal         | -1.55 | 2.17E-04 | Random slug protein 5                                      |                                                |
| Solyc07g042520.2 | Sucrose synthase 4 (AHRD V1 **** contains Interpro domain(s) IPR012820 Sucrose synthase, plants and cyanobacteria IPR000368 Sucrose synthase                                     | -1.54 | 6.64E-06 | Sucrose synthase                                           | GO:0009058                                     |
| Solyc07g062500.2 | Cytochrome P450                                                                                                                                                                  | -1.54 | 9.69E-06 | Cytochrome p450 cyp72a219                                  | GO:0004497; GO:0005506; GO:0020037             |
| Solyc10g080240.1 | Remorin family protein (AHRD V1 ***- contains Interpro domain(s) IPR005516 Remorin, C-terminal region                                                                            | -1.54 | 9.37E-04 | Gata zinc finger domain-containing protein 8               |                                                |
| Solyc02g063410.2 | Hydroxyproline-rich glycoprotein (AHRD V1 ***- A9YWR1_MEDTR)                                                                                                                     | -1.53 | 1.56E-03 | Unknown Protein                                            |                                                |
| Solyc06g084820.1 | cytochrome P450                                                                                                                                                                  | -1.52 | 7.12E-07 | Geraniol 8-hydroxylase-                                    | GO:0020037; GO:0005506; GO:0004497; GO:0055114 |
| Solyc07g056200.2 | NBS-LRR class disease resistance protein (AHRD **-- D5L9G6_ORYSI)                                                                                                                | -1.52 | 6.05E-05 | Metal ion binding                                          |                                                |
| Solyc08g079870.1 | Subtilisin-like protease (AHRD V1 ***- Q9LWA3_SOLLG); Interpro domain(s) IPR015500 Peptidase S8, subtilisin-related IPR000209 Peptidase S8 and S53, subtilisin, kexin, sedolisin | -1.52 | 1.16E-12 | Subtilisin-like protease                                   | GO:0004252; GO:0042802; GO:0043086             |
| Solyc11g011710.1 | Auxin-responsive protein (AHRD V1 ***- A8IXW9_BRACM); Interpro domain(s) IPR003676 Auxin responsive SAUR protein                                                                 | -1.52 | 7.53E-05 | Auxin-induced protein 6b                                   |                                                |
| Solyc06g054090.1 | Ribosomal-protein-alanine N-acetyltransferase (AHRD V1 **** D3FS71_BACPE); Interpro domain(s) IPR000182 GCN5-related N-acetyltransferase                                         | -1.51 | 2.46E-04 | Gcn5-related n-acetyltransferase family protein            | GO:0008152; GO:0008999                         |
| Solyc06g060590.2 | Nodulin MtN3 family protein (AHRD V1 D7KK13_ARALY); contains Interpro domain(s) IPR018179 RAG1-activating protein 1 homologue                                                    | -1.5  | 1.34E-07 | Bidirectional sugar transporter sweet1                     | GO:0016021                                     |
| Solyc11g045460.1 | CXE carboxylesterase (AHRD V1 ***- Q0ZPW1_9ROSA); Interpro domain(s) IPR013094 Alpha/beta hydrolase fold-3                                                                       | -1.5  | 1.70E-03 | Probable carboxylesterase 15                               | GO:0008152; GO:0016787                         |
| Solyc03g120260.2 | Coatomer beta subunit (AHRD V1 ***- contains Interpro domain(s) IPR020472 G-protein beta WD-40 repeat, region                                                                    | -1.49 | 2.04E-04 | Beta subunit isoform 1                                     |                                                |
| Solyc01g097240.2 | Pathogenesis-related protein 4B (Fragment) (AHRD V1 Q6LBM4_TOBAC); contains Interpro domain(s) IPR018226 Barwin, conserved site IPR001153 Barwin                                 | -1.48 | 1.22E-06 | Chitinase hevein pr-4 wheatwin2                            | GO:0004568; GO:0006032; GO:0016998             |
| Solyc07g064600.2 | Endoribonuclease L-PSP family protein (AHRD V1 D7LAZO_ARALY); contains Interpro domain(s) IPR019897 YjgF-like protein, conserved site                                            | -1.48 | 2.01E-03 | Ribonuclease uk114                                         | GO:0005515; GO:0004521                         |
| Solyc11g066590.1 | Lysosomal Pro-X carboxypeptidase (AHRD V1 **-- contains Interpro domain(s) IPR008758 Peptidase S28                                                                               | -1.48 | 6.22E-09 | Lysosomal pro-x carboxypeptidase-                          | GO:0006508; GO:0008236                         |

|                  |                                                                                                                                                                                |       |          |                                                           |                                                            |
|------------------|--------------------------------------------------------------------------------------------------------------------------------------------------------------------------------|-------|----------|-----------------------------------------------------------|------------------------------------------------------------|
| Solyc02g070020.1 | UDP-glucosyltransferase (AHRD V1 **-* Q8LKG3_STERE); contains domain(s) IPR002213 UDP-glucuronosyl/UDP-glucosyltransferase                                                     | -1.47 | 6.56E-05 | Udp-glycosyltransferase 91c1                              | GO:0008152; GO:0016758                                     |
| Solyc12g088190.1 | Amino acid permease 6 (AHRD V1 Q7Y076_BRANA); contains Interpro domain(s) IPR013057 Amino acid transporter, transmembrane                                                      | -1.46 | 3.87E-09 | Amino acid permease 6                                     | GO:0015175; GO:0015172                                     |
| Solyc07g017610.2 | Saccharopine dehydrogenase (NAD(+)-L-glutamate-forming) (AHRD V1 C7PUW7_CHIPD); contains Interpro domain(s) IPR005097 Saccharopine dehydrogenase                               | -1.45 | 1.45E-08 | Alpha-amino adipic semialdehyde synthase                  | GO:0047131; GO:0055114                                     |
| Solyc10g083690.2 | Cytochrome P450                                                                                                                                                                | -1.45 | 1.17E-04 | Cytochrome p450 76a2                                      | GO:0004497; GO:0005506; GO:0020037                         |
| Solyc04g064530.1 | Unknown Protein (AHRD V1)                                                                                                                                                      | -1.44 | 1.08E-08 | Unknown Protein                                           |                                                            |
| Solyc08g079430.2 | Primary amine oxidase (AHRD V1 ***- contains Interpro domain(s) IPR000269 Copper amine oxidase                                                                                 | -1.44 | 1.40E-09 | Primary amine oxidase                                     | GO:0005507; GO:0008131; GO:0009308; GO:0048038; GO:0055114 |
| Solyc09g097770.2 | Cell wall protein (AHRD V1 ***- contains Interpro domain(s) IPR010800 Glycine rich                                                                                             | -1.44 | 2.22E-05 | Tyrosine- and lysine-rich protein precursor               |                                                            |
| Solyc01g067020.2 | Receptor like kinase, RLK                                                                                                                                                      | -1.42 | 6.15E-08 | Probable inactive receptor kinase                         | GO:0004675; GO:0006468                                     |
| Solyc02g079870.2 | Unknown Protein (AHRD V1)                                                                                                                                                      | -1.42 | 4.96E-08 | Unknown Protein                                           |                                                            |
| Solyc04g009850.2 | 1-aminocyclopropane-1-carboxylate oxidase-like protein (AHRD V1 **-* contains Interpro domain(s) IPR005123 Oxoglutarate and iron-dependent oxygenase                           | -1.42 | 6.00E-05 | 1-aminocyclopropane-1-carboxylate oxidase homolog 1       | GO:0016491                                                 |
| Solyc06g050800.2 | Amino acid transporter (AHRD V1 **** contains Interpro domain(s) IPR013057 Amino acid transporter, transmembrane                                                               | -1.42 | 3.63E-06 | Probable sodium-coupled neutral amino acid transporter 6  | GO:0015171                                                 |
| Solyc02g076980.2 | Cathepsin B-like cysteine proteinase (AHRD V1 CYSP_SCHMA); contains Interpro domain(s) IPR013128 Peptidase C1A, papain IPR000169 Peptidase, cysteine peptidase active site     | -1.41 | 1.91E-08 | Cysteine protease                                         | GO:0004197; GO:0006508                                     |
| Solyc03g083420.2 | OBP3-responsive gene 1 (AHRD V1 **-- contains Interpro domain(s) IPR002290 Serine/threonine protein kinase                                                                     | -1.4  | 1.09E-03 | Probable plastid-lipid-associated protein chloroplastic   | GO:0005515; GO:0006468                                     |
| Solyc04g005610.2 | NAC domain transcription factor (AHRD V1 Q5DM36_WHEAT); contains Interpro domain(s) IPR003441 No apical meristem (NAM) protein                                                 | -1.4  | 3.59E-04 | Nac transcription factor 29                               | GO:0003677; GO:0045449                                     |
| Solyc04g072380.2 | Phosphatidylinositol 3,4,5-trisphosphate-dependent Rac exchanger 2 protein V1 *--- PREX2_MOUSE); contains Interpro domain(s) IPR006869 Protein of unknown function DUF547      | -1.4  | 6.45E-04 | Vacuolar membrane-associated iml1                         | GO:0007242                                                 |
| Solyc03g095650.2 | MLO-like protein 17 (AHRD V1 ***- contains Interpro domain(s) IPR004326 Mlo-related protein                                                                                    | -1.39 | 1.09E-12 | Mlo1                                                      | GO:0008219; GO:0016021                                     |
| Solyc05g006990.2 | Nitrate transporter (AHRD V1 **-* Q7XAK5_PRUPE); Interpro domain(s) IPR000109 TGF-beta receptor, type I/II extracellular region                                                | -1.39 | 3.21E-07 | Protein nrt1 ptr family                                   | GO:0016020; GO:0042936                                     |
| Solyc01g006290.2 | Peroxidase (AHRD V1 **** Q42964_TOBAC); contains domain(s) IPR002016 Haem peroxidase, plant/fungal/bacterial                                                                   | -1.38 | 1.47E-07 | Lignin-forming anionic peroxidase                         | GO:0004601; GO:0006979; GO:0020037; GO:0055114             |
| Solyc04g079420.2 | Nbs-1rr, resistance protein                                                                                                                                                    | -1.38 | 1.37E-09 | Probable disease resistance protein                       | GO:0006952                                                 |
| Solyc06g076330.2 | Laccase (AHRD V1 **** O24044_LIRTU); contains domain(s) IPR017761 Laccase                                                                                                      | -1.38 | 1.06E-03 | Laccase 2                                                 | GO:0016491                                                 |
| Solyc11g017280.1 | Receptor like kinase, RLK                                                                                                                                                      | -1.38 | 2.93E-04 | Leucine-rich repeat receptor-like tyrosine-protein kinase | GO:0006468                                                 |
| Solyc01g005470.2 | Cell number regulator 10 (AHRD V1 D9HP26_MAIZE); contains Interpro domain(s) IPR006461 Protein of unknown function Cys-rich                                                    | -1.37 | 3.17E-05 | Protein plant cadmium resistance 2                        |                                                            |
| Solyc04g053110.1 | Glutaredoxin (AHRD V1 **** B9I9V9_POPTR); contains domain(s) IPR011905 Glutaredoxin-like, plant II                                                                             | -1.37 | 1.05E-03 | Monothiol glutaredoxin-s6-like                            | GO:0045454; GO:0008794                                     |
| Solyc06g048410.2 | Superoxide dismutase (AHRD V1 **** Q7YK44_SOLLC); Interpro domain(s) IPR019833 Manganese/iron superoxide dismutase, binding site IPR001189 Manganese/iron superoxide dismutase | -1.37 | 3.96E-08 | Superoxide dismutase                                      | GO:0004784; GO:0006801; GO:0046872; GO:0055114             |
| Solyc06g069430.2 | MADS box transcription factor (AHRD V1 Q9SBQ1_PETHY); contains Interpro domain(s) IPR002487 Transcription factor, K-box                                                        | -1.37 | 3.39E-05 | Agamous-like mads-box protein agl8 homolog                | GO:0003700; GO:0005634; GO:0006355                         |
| Solyc09g064940.2 | Phenazine biosynthesis protein PhzF family (AHRD ***- B4VKV9_9CYAN); contains Interpro domain(s) IPR003719 Phenazine biosynthesis PhzC/PhzF protein                            | -1.37 | 3.04E-10 | Phenazine biosynthesis-like domain-containing protein 1   | GO:0003824; GO:0009058                                     |

|                  |                                                                                                                                                                            |       |          |                                                                  |                                                |
|------------------|----------------------------------------------------------------------------------------------------------------------------------------------------------------------------|-------|----------|------------------------------------------------------------------|------------------------------------------------|
| Solyc01g005230.2 | S-adenosyl-L-methionine salicylic acid carboxyl methyltransferase (AHRD **** A7XZE9_9MAGN); contains Interpro domain(s) IPR005299 SAM dependent carboxyl methyltransferase | -1.36 | 8.82E-04 | Probable s-adenosylmethionine-dependent methyltransferase        | GO:0008168                                     |
| Solyc01g010770.2 | Spfh domain / band 7 family (AHRD V1 **-- B4AS86_FRANO); contains Interpro domain(s) IPR001107 Band 7 protein                                                              | -1.36 | 1.36E-06 | Hypersensitive-induced response protein 2                        | GO:0005515                                     |
| Solyc07g005420.1 | Unknown Protein (AHRD V1)                                                                                                                                                  | -1.36 | 9.62E-05 | Unknown Protein                                                  |                                                |
| Solyc07g008310.2 | Rieske (2Fe-2S) domain protein (AHRD V1 Q024N8_SOLUE); contains Interpro domain(s) IPR001663 Aromatic-ring-hydroxylating dioxygenase, alpha subunit                        | -1.35 | 6.03E-08 | Choline chloroplastic                                            | GO:0005506; GO:0006725; GO:0051537; GO:0055114 |
| Solyc05g050340.2 | WRKY transcription factor 6 (AHRD V1 C9DHZ5_9ROSI); contains Interpro domain(s) IPR003657 DNA-binding WRKY                                                                 | -1.34 | 1.01E-04 | Probable wrky transcription factor 41                            | GO:0003700; GO:0005634; GO:0043565; GO:0045449 |
| Solyc12g100030.1 | LRR receptor-like serine/threonine-protein kinase, RLP                                                                                                                     | -1.34 | 1.05E-04 | Receptor-like protein 12                                         | GO:0005515; GO:0004675                         |
| Solyc01g102850.1 | Tir-nbs-lrr, resistance protein                                                                                                                                            | -1.33 | 5.72E-08 | Tmv resistance protein n                                         | GO:0004888; GO:0007165; GO:0031224; GO:0045087 |
| Solyc12g006380.1 | 1-aminocyclopropane-1-carboxylate oxidase-like protein (AHRD V1 *** contains Interpro domain(s) IPR005123 Oxoglutarate and iron-dependent oxygenase                        | -1.33 | 5.64E-06 | 1-aminocyclopropane-1-carboxylate oxidase homolog                | GO:0016491                                     |
| Solyc02g063510.1 | Unknown Protein (AHRD V1)                                                                                                                                                  | -1.32 | 1.99E-03 | Unknown Protein                                                  |                                                |
| Solyc03g026370.1 | Peptidoglycan-binding LysM domain-containing protein (AHRD V1 D7MLA8_ARALY); contains Interpro domain(s) IPR018392 Peptidoglycan-binding lysin domain                      | -1.32 | 1.34E-03 | Peptidoglycan-binding domain-containing protein                  | GO:0016998                                     |
| Solyc05g054750.2 | Plant-specific domain TIGR01589 family protein (AHRD *- B4FFL2_MAIZE); contains Interpro domain(s) IPR006476 Conserved hypothetical protein CHP01589, plant                | -1.32 | 3.00E-06 | Unknown Protein                                                  |                                                |
| Solyc09g083200.2 | Nod factor receptor protein (Fragment) (AHRD ***- B6ZN07_GLYSO); contains Interpro domain(s) IPR002482 Peptidoglycan-binding Lysin subgroup                                | -1.32 | 4.62E-05 | Protein lyk5-                                                    | GO:0016998                                     |
| Solyc01g006300.2 | Peroxidase (AHRD V1 **** Q43774_SOLLC); contains domain(s) IPR002016 Haem peroxidase, plant/fungal/bacterial                                                               | -1.31 | 2.11E-08 | Lignin-forming anionic peroxidase                                | GO:0004601; GO:0006979; GO:0020037; GO:0055114 |
| Solyc02g063020.1 | Major facilitator superfamily MFS_1 (AHRD V1 A4FJQ9_SACEN); contains Interpro domain(s) IPR016196 Major facilitator superfamily, general substrate transporter             | -1.31 | 3.39E-04 | Major facilitator superfamily protein                            | GO:0055085; GO:0005351                         |
| Solyc05g007770.2 | NAC domain transcription factor (AHRD V1 Q5DM36_WHEAT); contains Interpro domain(s) IPR003441 No apical meristem (NAM) protein                                             | -1.31 | 2.98E-05 | Nac transcription factor 29-like                                 | GO:0003677; GO:0045449                         |
| Solyc12g045020.1 | Cytochrome P450                                                                                                                                                            | -1.31 | 2.39E-04 | Cytochrome p450 cyp736a12                                        | GO:0004497; GO:0005506; GO:0020037             |
| Solyc01g095170.2 | Harpin-induced protein (AHRD V1 ***- B6SP51_MAIZE); Interpro domain(s) IPR010847 Harpin-induced 1                                                                          | -1.3  | 7.10E-04 | Late embryogenesis abundant hydroxyproline-rich glycoprotein     |                                                |
| Solyc03g082620.2 | Oligopeptide transporter (Fragment) (AHRD V1 **** contains Interpro domain(s) IPR004813 Oligopeptide transporter OPT superfamily                                           | -1.3  | 1.23E-06 | Metal-nicotianamine transporter ysl2                             | GO:0015198; GO:0055085                         |
| Solyc04g074000.2 | Receptor like kinase, RLK                                                                                                                                                  | -1.3  | 4.58E-07 | Probable lrr receptor-like serine threonine-protein kinase       | GO:0004713; GO:0005524; GO:0006468             |
| Solyc07g008240.2 | Non-symbiotic hemoglobin protein (AHRD V1 ***- contains Interpro domain(s) IPR001032 Leghaemoglobin                                                                        | -1.3  | 1.47E-03 | Non-symbiotic hemoglobin 1                                       | GO:0005506; GO:0015671; GO:0019825; GO:0020037 |
| Solyc08g016210.2 | LRR receptor-like serine/threonine-protein kinase, RLP                                                                                                                     | -1.3  | 2.81E-07 | Lrr receptor-like serine threonine-protein kinase                | GO:0005515                                     |
| Solyc01g080410.2 | Peptide methionine sulfoxide reductase msrB (AHRD ***- B6T2C6_MAIZE); contains Interpro domain(s) IPR002579 Methionine sulphoxide reductase B                              | -1.29 | 7.74E-04 | Peptide methionine sulfoxide reductase b5                        | GO:0055114                                     |
| Solyc02g084850.2 | Unknown Protein (AHRD V1); contains Interpro IPR000167 Dehydrin                                                                                                            | -1.29 | 6.27E-05 | Unknown Protein                                                  | GO:0006950; GO:0009415                         |
| Solyc03g078150.2 | Amino acid transporter family protein (AHRD **** D7LGK0_ARALY); contains Interpro domain(s) IPR013057 Amino acid transporter, transmembrane                                | -1.29 | 4.63E-04 | Vacuolar amino acid transporter 1                                | GO:0015171                                     |
| Solyc03g098240.2 | Glutamate decarboxylase (AHRD V1 **** B6TV07_MAIZE); Interpro domain(s) IPR010107 Glutamate decarboxylase                                                                  | -1.29 | 8.49E-06 | Glutamate decarboxylase                                          | GO:0003824; GO:0030170                         |
| Solyc04g007800.2 | C2 domain-containing protein (AHRD V1 **-- contains Interpro domain(s) IPR018029 C2 membrane targeting protein                                                             | -1.29 | 1.58E-05 | Probable adp-ribosylation factor gtpase-activating protein agd11 |                                                |
| Solyc04g040130.1 | Omega-6 fatty acid desaturase (AHRD V1 Q461Q1_HEVBR); contains Interpro domain(s) IPR005804 Fatty acid desaturase, type 1                                                  | -1.29 | 2.72E-04 | Omega-6 fatty acid endoplasmic reticulum isozyme 2               | GO:0006629; GO:0016491                         |

|                  |                                                                                                                                                                                          |       |          |                                                           |                                                |
|------------------|------------------------------------------------------------------------------------------------------------------------------------------------------------------------------------------|-------|----------|-----------------------------------------------------------|------------------------------------------------|
| Solyc05g050130.2 | Acidic chitinase (AHRD V1 *- Q71HN4_FICAW); Interpro domain(s) IPR001223 Glycoside hydrolase, family 18, catalytic domain                                                                | -1.29 | 4.60E-07 | Acidic endochitinase                                      | GO:0003824; GO:0005975; GO:0043169             |
| Solyc08g068860.2 | Aspartic proteinase nepenthesin-1 (AHRD V1 *- contains Interpro domain(s) IPR001461 Peptidase A1                                                                                         | -1.29 | 4.36E-09 | Protein aspartic protease in guard cell 2                 | GO:0004190; GO:0006508                         |
| Solyc09g075210.2 | Late embryogenesis abundant protein 5 (AHRD *- Q1HGG0_9ROSI); contains Interpro domain(s) IPR004926 Late embryogenesis abundant protein 3                                                | -1.29 | 3.35E-04 | Late embryogenesis abundant protein lea5                  | GO:0006950                                     |
| Solyc07g055710.2 | Heat stress transcription factor A3 (AHRD *- D1M7W9_SOLLC); contains Interpro domain(s) IPR000232 Heat shock factor (HSF)-type, DNA-binding                                              | -1.28 | 9.10E-04 | Heat stress transcription factor a-4b                     | GO:0003700; GO:0005634; GO:0006355; GO:0043565 |
| Solyc08g007460.2 | Non-specific lipid-transfer protein (AHRD V1 -*** contains Interpro domain(s) IPR003612 Plant lipid transfer protein/seed storage/trypsin-alpha amylase inhibitor                        | -1.28 | 4.01E-04 | Lipid transfer-like protein vas                           | GO:0008289                                     |
| Solyc01g107820.2 | UDP-glucosyltransferase family 1 protein (AHRD V1 C6K143_CITSI); contains Interpro domain(s) IPR002213 UDP-glucuronosyl/UDP-glucosyltransferase                                          | -1.27 | 6.71E-07 | Scopoletin glucosyltransferase                            | GO:0008152; GO:0016758                         |
| Solyc01g106620.2 | Pathogenesis-related protein 1a (AHRD V1 *- contains Interpro domain(s) IPR018244 Allergen V5/Tpx-1 related, conserved site                                                              | -1.26 | 5.64E-05 | Basic form of pathogenesis-related protein 1              | GO:0005515; GO:0005576                         |
| Solyc04g007990.1 | Unknown Protein (AHRD V1)                                                                                                                                                                | -1.26 | 6.30E-05 | Unknown Protein                                           |                                                |
| Solyc01g014840.2 | Tir-nbs-lrr, resistance protein                                                                                                                                                          | -1.25 | 7.10E-04 | Tmv resistance protein n                                  | GO:0006952                                     |
| Solyc04g072760.2 | High affinity sulfate transporter 2 (AHRD **** SUT2_STYHA); contains Interpro domain(s) IPR001902 Sulphate anion transporter                                                             | -1.25 | 1.23E-03 | Sulfate transporter                                       | GO:0008271; GO:0008272; GO:0016020             |
| Solyc05g050120.2 | Malic enzyme (AHRD V1 *- O04936_SOLLC); Interpro domain(s) IPR012302 Malic enzyme, NAD-binding                                                                                           | -1.25 | 1.17E-07 | Nadp-dependent malic enzyme                               | GO:0003824; GO:0005488; GO:0008152             |
| Solyc05g051850.2 | Inositol-3-phosphate synthase (AHRD V1 *- C4PW06_ARATH); Interpro domain(s) IPR002587 Myo-inositol-1-phosphate synthase                                                                  | -1.24 | 8.09E-04 | Inositol-3-phosphate synthase                             | GO:0003824; GO:0005488; GO:0008152             |
| Solyc11g011440.1 | Aspartic proteinase nepenthesin-1 (AHRD V1 *- contains Interpro domain(s) IPR001461 Peptidase A1                                                                                         | -1.24 | 1.06E-05 | Aspartic proteinase pcs1                                  | GO:0004190; GO:0006508                         |
| Solyc01g081270.2 | Glutathione S-transferase (AHRD V1 *- Q8H9E5_CUCMA); Interpro domain(s) IPR004046 Glutathione S-transferase, C-terminal                                                                  | -1.23 | 7.82E-04 | Glutathione transferase gst 23                            |                                                |
| Solyc04g014400.2 | LRR receptor-like serine/threonine-protein kinase, RLP                                                                                                                                   | -1.23 | 1.80E-09 | Lrr receptor-like serine threonine-protein kinase fls2    | GO:0005515                                     |
| Solyc07g041900.2 | Cathepsin L-like cysteine proteinase (AHRD V1 A7LJ78_DERVA); contains Interpro domain(s) IPR013128 Peptidase C1A, papain IPR000169 Peptidase, cysteine peptidase active site             | -1.23 | 6.07E-04 | Cysteine proteinase 3                                     | GO:0004197; GO:0006508                         |
| Solyc05g008960.2 | Receptor-like protein kinase (AHRD V1 *- contains Interpro domain(s) IPR002290 Serine/threonine protein kinase                                                                           | -1.22 | 5.74E-04 | Probable serine threonine-protein kinase                  | GO:0006468                                     |
| Solyc02g078380.2 | Aluminum-induced protein-like protein (AHRD V1 *-)                                                                                                                                       | -1.21 | 2.40E-08 | Stem-specific protein tsjt1                               |                                                |
| Solyc01g108790.1 | 3-hydroxyisobutyryl-CoA hydrolase-like protein 2, mitochondrial (AHRD *- HIBC5_ARATH)                                                                                                    | -1.2  | 7.64E-04 | 3-hydroxyisobutyryl- hydrolase 1                          |                                                |
| Solyc04g009860.2 | 1-aminocyclopropane-1-carboxylate oxidase-like protein (AHRD V1 *- contains Interpro domain(s) IPR005123 Oxoglutarate and iron-dependent oxygenase                                       | -1.2  | 1.39E-03 | 1-aminocyclopropane-1-carboxylate oxidase homolog 1       | GO:0016491                                     |
| Solyc12g013620.1 | NAC domain protein IPR003441 (AHRD V1 B9N1K9_POPT); contains Interpro domain(s) IPR003441 No apical meristem (NAM) protein                                                               | -1.2  | 6.68E-04 | Nac domain-containing protein 72                          | GO:0003677; GO:0045449                         |
| Solyc06g071070.1 | Short-chain dehydrogenase/reductase family protein (AHRD V1 D7L204_ARALY); contains Interpro domain(s) IPR002347 Glucose/ribitol dehydrogenase                                           | -1.19 | 3.45E-04 | Short-chain type dehydrogenase reductase                  | GO:0008152; GO:0016491                         |
| Solyc06g076470.2 | Unknown Protein (AHRD V1)                                                                                                                                                                | -1.19 | 3.15E-05 | Unknown Protein                                           |                                                |
| Solyc03g044790.2 | Alpha-hydroxynitrile lyase (AHRD V1 *- O49897_MANES); Interpro domain(s) IPR000073 Alpha/beta hydrolase fold-1                                                                           | -1.18 | 1.66E-03 | Salicylic acid-binding protein 2                          | GO:0003824; GO:0080030; GO:0080031             |
| Solyc08g076050.2 | ARK3 product/receptor-like serine/threonine protein kinase ARK3 V1 **** Q9S971_ARATH); contains Interpro domain(s) IPR002290 Serine/threonine protein kinase                             | -1.18 | 5.83E-05 | G-type lectin s-receptor- serine threonine-protein kinase | GO:0004672; GO:0005524; GO:0006468             |
| Solyc01g081310.2 | Glutathione-S-transferase (AHRD V1 *- B2BY02_9BRAS); contains domain(s) IPR004045 Glutathione S-transferase, N-terminal IPR017933 Glutathione S-transferase/chloride channel, C-terminal | -1.17 | 8.68E-05 | Glutathione transferase gst 23                            |                                                |
| Solyc02g084840.2 | Dehydrin DHN1 (AHRD V1 *- DHN1_PEA); Interpro domain(s) IPR000167 Dehydrin                                                                                                               | -1.17 | 2.72E-03 | Cold shock protein                                        | GO:0006950; GO:0009415                         |



|                  |                                                                                                                                                  |       |          |                                                                 |                                                |
|------------------|--------------------------------------------------------------------------------------------------------------------------------------------------|-------|----------|-----------------------------------------------------------------|------------------------------------------------|
| Solyc04g079480.2 | Serpin (Serine protease inhibitor) (AHRD V1 Q53P13_ORYSJ); contains Interpro domain(s) IPR015554 Protease inhibitor I4, serpin, plant            | -1.17 | 1.34E-03 | Serpin-zx                                                       | GO:0004867                                     |
| Solyc05g009500.2 | Peptide transporter (AHRD V1 *** A6YJX4_9MAGN); Interpro domain(s) IPR000109 TGF-beta receptor, type I/II extracellular region                   | -1.17 | 3.37E-08 | Protein nrt1 ptr family                                         | GO:0042937; GO:0016020; GO:0042936             |
| Solyc07g007150.1 | Unknown Protein (AHRD V1)                                                                                                                        | -1.17 | 6.73E-04 | Unknown Protein                                                 |                                                |
| Solyc08g068870.2 | Aspartic proteinase nepenthesin-1 (AHRD V1 *** contains Interpro domain(s) IPR001461 Peptidase A1                                                | -1.17 | 1.12E-08 | Protein aspartic protease in guard cell 2                       | GO:0004190; GO:0006508                         |
| Solyc04g006940.2 | Phospholipid-transporting ATPase (AHRD V1 **** C1GDL1_PARBD); Interpro domain(s) IPR006539 ATPase, P-type, phospholipid-translocating, flippase  | -1.16 | 1.44E-04 | Phospholipid-transporting atpase 9                              | GO:0004012; GO:0016021                         |
| Solyc04g064590.1 | Protein kinase (AHRD V1 *- Q40541_TOBAC); Interpro domain(s) IPR015748 Mitogen activated protein kinase kinase 3                                 | -1.16 | 6.03E-04 | Mitogen-activated protein kinase kinase kinase yoda-like        | GO:0006468                                     |
| Solyc06g076520.1 | class I heat shock protein (AHRD ***- Q69BI7_CARPA); contains Interpro domain(s) IPR002068 Heat shock protein Hsp20                              | -1.16 | 2.41E-05 | Kda class i heat shock                                          | GO:0051082                                     |
| Solyc06g076560.1 | class I heat shock protein (AHRD ***- Q69BI7_CARPA); contains Interpro domain(s) IPR002068 Heat shock protein Hsp20                              | -1.16 | 4.74E-06 | Kda class i heat shock                                          | GO:0051082                                     |
| Solyc07g005100.2 | Chitinase-like protein (AHRD V1 ***- O81861_ARATH); Interpro domain(s) IPR011583 Chitinase II                                                    | -1.16 | 3.32E-09 | Class v                                                         | GO:0003824; GO:0005975; GO:0043169             |
| Solyc01g105310.2 | Metacaspase (AHRD V1 ***- A8NU42_COPC7); contains domain(s) IPR011600 Peptidase C14, caspase catalytic                                           | -1.15 | 1.55E-04 | Metacaspase-3                                                   | GO:0000287; GO:0004427; GO:0005737; GO:0006796 |
| Solyc02g072470.2 | Receptor like kinase, RLK                                                                                                                        | -1.14 | 6.22E-04 | Probable lrr receptor-like serine threonine-protein kinase hat5 | GO:0005515; GO:0019199; GO:0055114             |
| Solyc03g113270.2 | Homeobox-leucine zipper-like protein (AHRD V1 *- contains Interpro domain(s) IPR001356 Homeobox IPR017970 Homeobox, conserved site               | -1.14 | 3.67E-05 | Homeobox-leucine zipper protein                                 | GO:0003677; GO:0045449                         |
| Solyc10g006750.2 | CONSTANS-like zinc finger protein (AHRD V1 D0EP04_SOYBN); contains Interpro domain(s) IPR000315 Zinc finger, B-box                               | -1.14 | 6.33E-05 | Zinc finger protein constans                                    | GO:0005622; GO:0008270                         |
| Solyc10g085140.1 | Undecaprenyl pyrophosphate synthase (AHRD V1 ***- contains Interpro domain(s) IPR001441 Di-trans-poly-cis-decaprenylcistransferase-like          | -1.14 | 8.09E-06 | Dehydrodolichyl diphosphate synthase 2                          | GO:0016765                                     |
| Solyc07g043230.2 | Low affinity zinc transporter (AHRD V1 A3LU47_PICST); contains Interpro domain(s) IPR004698 Zinc/iron permease, fungal and plant                 | -1.13 | 1.81E-05 | Zinc transporter 5                                              | GO:0016020; GO:0030001; GO:0046873             |
| Solyc08g082120.2 | Methanol inducible protein (AHRD V1 ***-                                                                                                         | -1.13 | 9.73E-05 | Methanol inducible protein                                      |                                                |
| Solyc09g008250.2 | MYB transcription factor (AHRD V1 *- contains Interpro domain(s) IPR015495 Myb transcription factor                                              | -1.13 | 1.10E-04 | Transcription factor rax2                                       | GO:0003700; GO:0005516; GO:0003677             |
| Solyc01g009700.1 | LRR receptor-like serine/threonine-protein kinase, RLP                                                                                           | -1.12 | 7.67E-05 | Receptor-like protein 12                                        | GO:0005515                                     |
| Solyc01g091870.2 | Major facilitator superfamily domain-containing protein 8 V1 *** MFSD8_XENLA); contains Interpro domain(s) IPR004331 SPX, N-terminal             | -1.12 | 5.51E-04 | Spx domain-containing membrane protein                          | GO:0055085                                     |
| Solyc01g095320.2 | BCL-2-associated athanogene 6 (AHRD V1 *- contains Interpro domain(s) IPR003103 Apoptosis regulator Bcl-2 protein, BAG                           | -1.12 | 2.16E-03 | Bag family molecular chaperone regulator 6                      | GO:0006915                                     |
| Solyc01g098020.2 | Acetyltransferase GNAT family protein expressed (AHRD ***- Q75GC2_ORYSJ); contains Interpro domain(s) IPR000182 GCN5-related N-acetyltransferase | -1.12 | 4.76E-06 | Unknown Protein                                                 | GO:0008152                                     |
| Solyc01g108540.2 | Acetyl esterase (AHRD V1 ***- AES_SHIFL); Interpro domain(s) IPR013094 Alpha/beta hydrolase fold-3                                               | -1.12 | 1.51E-03 | 2-hydroxyisoflavanone dehydratase                               | GO:0008152; GO:0016787                         |
| Solyc03g031990.2 | Auxin efflux carrier family protein (AHRD **** D7KJ74_ARALY); contains Interpro domain(s) IPR004776 Auxin efflux carrier                         | -1.12 | 1.81E-03 | Uncharacterized transporter                                     | GO:0016021                                     |
| Solyc07g008020.2 | Auxin response factor 16 (AHRD V1 ARFP_ORYSJ); contains Interpro domain(s) IPR003311 AUX/IAA protein                                             | -1.12 | 1.99E-06 | Auxin-responsive protein                                        | GO:0005634; GO:0045449                         |
| Solyc09g090080.1 | Inorganic phosphate transporter (AHRD V1 **** contains Interpro domain(s) IPR004738 Phosphate permease                                           | -1.12 | 4.73E-04 | Inorganic phosphate transporter 1-4                             | GO:0005315; GO:0016021                         |
| Solyc01g008510.2 | Photosystem II 5 kDa protein, chloroplastic V1 *- PST2_GOSHI)                                                                                    | -1.11 | 2.63E-03 | Photosystem ii 5 kda chloroplastic                              |                                                |
| Solyc01g079170.2 | Galactinol synthase (AHRD V1 ***- D6QSF5_BRANA); Interpro domain(s) IPR002495 Glycosyl transferase, family 8                                     | -1.11 | 6.40E-05 | Galactinol synthase 1                                           | GO:0016757                                     |
| Solyc01g109500.2 | BURP domain-containing protein (AHRD V1 *** contains Interpro domain(s) IPR004873 BURP                                                           | -1.11 | 1.60E-08 | Burp domain-containing protein 3                                |                                                |

|                  |                                                                                                                                                                            |       |          |                                                                    |                                                |
|------------------|----------------------------------------------------------------------------------------------------------------------------------------------------------------------------|-------|----------|--------------------------------------------------------------------|------------------------------------------------|
| Solyc03g078370.1 | Receptor-like protein kinase (AHRD V1 ***- contains Interpro domain(s) IPR002290 Serine/threonine protein kinase                                                           | -1.11 | 1.96E-03 | G-type lectin s-receptor-like serine threonine-protein kinase rlk1 | GO:0004672; GO:0005524; GO:0006468             |
| Solyc05g015490.2 | Non-specific lipid-transfer protein (AHRD V1 ***- contains Interpro domain(s) IPR003612 Plant lipid transfer protein/seed storage/trypsin-alpha amylase inhibitor          | -1.11 | 5.20E-08 | Non-specific lipid transfer protein gpi-anchored 1                 |                                                |
| Solyc12g096570.1 | ARGOS (AHRD V1 ***- C7SFP7_SOLLC)                                                                                                                                          | -1.11 | 7.61E-05 | Argos-like protein                                                 |                                                |
| Solyc01g005410.2 | Calcium binding protein Caleosin (AHRD V1 A8N0P5_COPC7); contains Interpro domain(s) IPR007736 Caleosin related                                                            | -1.1  | 9.21E-04 | Probable peroxygenase 5                                            | GO:0005509                                     |
| Solyc01g096340.2 | Auxin-induced SAUR-like protein (AHRD V1 ***- contains Interpro domain(s) IPR003676 Auxin responsive SAUR protein                                                          | -1.1  | 1.51E-05 | Auxin-induced protein 15a                                          | GO:0005516                                     |
| Solyc02g085770.2 | ABA induced plasma membrane protein PM (AHRD V1 ***- P93615_WHEAT); contains Interpro domain(s) IPR008390 AWPM-19-like                                                     | -1.1  | 1.13E-06 | Awpm-19-like family                                                |                                                |
| Solyc03g123710.2 | Unknown Protein (AHRD V1)                                                                                                                                                  | -1.1  | 4.08E-04 | Unknown Protein                                                    |                                                |
| Solyc08g067310.1 | CBL-interacting protein kinase 6 (AHRD V1 A0MNL4_POPTR); contains Interpro domain(s) IPR002290 Serine/threonine protein kinase                                             | -1.1  | 1.03E-03 | Cbl-interacting serine threonine-protein kinase 5                  | GO:0004672; GO:0005524; GO:0006468             |
| Solyc01g014320.2 | S-adenosyl-L-methionine salicylic acid carboxyl methyltransferase (AHRD **** A7XZE9_9MAGN); contains Interpro domain(s) IPR005299 SAM dependent carboxyl methyltransferase | -1.09 | 3.12E-05 | Probable s-adenosylmethionine-dependent methyltransferase          | GO:0008168                                     |
| Solyc01g087800.2 | Subtilisin-like protease (AHRD V1 ***- O82777_SOLLC); Interpro domain(s) IPR015500 Peptidase S8, subtilisin-related                                                        | -1.09 | 4.57E-04 | Subtilisin-like protease                                           | GO:0004252; GO:0042802; GO:0043086             |
| Solyc01g095340.2 | Unknown Protein (AHRD V1)                                                                                                                                                  | -1.09 | 8.64E-04 | Bag family molecular chaperone regulator 6                         |                                                |
| Solyc03g120900.1 | Protein transport SEC13-like protein (AHRD V1 Q2PYY1_SOLTU); contains Interpro domain(s) IPR020472 G-protein beta WD-40 repeat, region                                     | -1.09 | 1.48E-03 | Protein transport protein sec13 homolog b                          | GO:0005515                                     |
| Solyc05g014280.2 | Heat shock protein (AHRD V1 ***- contains Interpro domain(s) IPR002068 Heat shock protein Hsp20                                                                            | -1.09 | 5.50E-05 | Small heat shock chloroplastic                                     |                                                |
| Solyc08g078040.2 | Monoxygenase FAD-binding (AHRD V1 ***- D8MSJ3_9ENTR); Interpro domain(s) IPR003042 Aromatic-ring hydroxylase-like                                                          | -1.09 | 1.93E-03 | Zeaxanthin chloroplastic                                           | GO:0009055; GO:0016491                         |
| Solyc08g082190.2 | Unknown Protein (AHRD V1)                                                                                                                                                  | -1.09 | 1.22E-04 | Keratin-associated protein 6-2-like                                |                                                |
| Solyc00g136560.2 | Undecaprenyl pyrophosphate synthase (AHRD V1 *- contains Interpro domain(s) IPR001441 Di-trans-poly-cis-decaprenylcistransferase-like                                      | -1.08 | 2.61E-04 | Unknown Protein                                                    | GO:0016765                                     |
| Solyc02g063270.2 | Multidrug and toxin extrusion protein 1 V1 **-- S47A1_MOUSE); contains Interpro domain(s) IPR015521 MATE family transporter related protein                                | -1.08 | 1.82E-06 | Mate efflux family protein 5                                       | GO:0006855; GO:0015238; GO:0015297; GO:0016020 |
| Solyc03g119930.1 | Sulfate transporter like protein (AHRD V1 Q0WP36_ARATH); contains Interpro domain(s) IPR011547 Sulphate transporter                                                        | -1.08 | 4.92E-07 | Molybdate transporter 2                                            | GO:0005215; GO:0006810; GO:0016021             |
| Solyc06g053260.1 | Auxin-responsive family protein (AHRD V1 ***- contains Interpro domain(s) IPR003676 Auxin responsive SAUR protein                                                          | -1.08 | 5.10E-06 | Auxin-induced protein                                              |                                                |
| Solyc09g091660.2 | ABC transporter G family member 40 V1 ***- AB40G_ARATH); contains Interpro domain(s) IPR013525 ABC-2 type transporter                                                      | -1.08 | 1.80E-07 | Pleiotropic drug resistance protein 1                              | GO:0016020                                     |
| Solyc02g089510.2 | Unknown Protein (AHRD V1)                                                                                                                                                  | -1.07 | 2.86E-03 | Zinc finger protein constans                                       |                                                |
| Solyc07g061890.1 | Unknown Protein (AHRD V1)                                                                                                                                                  | -1.07 | 1.55E-03 | Unknown protein                                                    |                                                |
| Solyc08g079420.2 | Cytochrome P450                                                                                                                                                            | -1.07 | 6.62E-05 | Geraniol 8-hydroxylase                                             | GO:0004497; GO:0005506; GO:0020037             |
| Solyc12g013690.1 | Monoxygenase FAD-binding protein (AHRD V1 **-- contains Interpro domain(s) IPR003042 Aromatic-ring hydroxylase-like                                                        | -1.07 | 7.62E-05 | Zeaxanthin chloroplastic                                           | GO:0009055; GO:0016491                         |
| Solyc01g104110.2 | Legumin 11S-globulin (AHRD V1 **-- Q39770_GINBI); Interpro domain(s) IPR011051 Cupin, RmlC-type                                                                            | -1.06 | 3.66E-04 | 13s globulin seed storage protein 2                                | GO:0045735                                     |
| Solyc01g105660.2 | 1-aminocyclopropane-1-carboxylate oxidase (AHRD V1 **-- ACCO_TOBAC); Interpro domain(s) IPR005123 Oxoglutarate and iron-dependent oxygenase                                | -1.06 | 5.86E-05 | Probable 2-oxoglutarate fe - dependent dioxygenase                 | GO:0016491                                     |
| Solyc06g076450.2 | Ras-related protein Rab-25 (AHRD V1 ***- contains Interpro domain(s) IPR015595 Rab11-related                                                                               | -1.06 | 2.23E-03 | Ras-related protein rab11a                                         | GO:0005524; GO:0005622; GO:0006355; GO:0008134 |
| Solyc01g103650.2 | Hydrolase alpha/beta fold family (AHRD V1 A4VRL9_PSEU5); contains Interpro domain(s) IPR012020 AB-hydrolase YheT, putative                                                 | -1.05 | 1.20E-05 | Embryogenesis-associated protein emb8                              | GO:0004091                                     |

|                  |                                                                                                                                                        |       |          |                                                                                |                                    |
|------------------|--------------------------------------------------------------------------------------------------------------------------------------------------------|-------|----------|--------------------------------------------------------------------------------|------------------------------------|
| Solyc06g007430.1 | CBL-interacting protein kinase 11 (AHRD V1 C4P7W0_VITVI); contains Interpro domain(s) IPR002290 Serine/threonine protein kinase                        | -1.05 | 3.73E-06 | Cbl-interacting protein kinase 2                                               | GO:0004672; GO:0005524; GO:0006468 |
| Solyc08g065320.2 | Transmembrane protein 222 (Fragment) (AHRD V1 Q5SSD9_HUMAN); contains Interpro domain(s) IPR008496 Protein of unknown function DUF778                  | -1.05 | 6.94E-07 | Protein reversion-to-ethylene sensitivity1                                     |                                    |
| Solyc09g011580.2 | Glutathione S-transferase-like protein (AHRD V1 **** contains Interpro domain(s) IPR004046 Glutathione S-transferase, C-terminal                       | -1.05 | 2.13E-07 | Probable glutathione s-transferase                                             | GO:0004364; GO:0043295             |
| Solyc09g011590.2 | Glutathione S-transferase-like protein (AHRD V1 **** contains Interpro domain(s) IPR004046 Glutathione S-transferase, C-terminal                       | -1.05 | 4.52E-06 | Probable glutathione s-transferase                                             | GO:0004364                         |
| Solyc11g008440.1 | Amino acid transporter (AHRD V1 **** contains Interpro domain(s) IPR013057 Amino acid transporter, transmembrane                                       | -1.05 | 2.94E-04 | Vacuolar amino acid transporter 1                                              | GO:0015186; GO:0015188; GO:0005302 |
| Solyc04g080700.2 | Wound responsive protein (Fragment) (AHRD V1 A6N0L4_ORYSI); contains Interpro domain(s) IPR003729 Protein of unknown function DUF151                   | -1.04 | 1.72E-06 | Bifunctional nuclease 2-like                                                   |                                    |
| Solyc06g051360.2 | 2-oxoglutarate-dependent dioxygenase (AHRD V1 ***- B9HHR0_POPTR)                                                                                       | -1.04 | 1.15E-03 | Gibberellin 2-beta-dioxygenase 1                                               |                                    |
| Solyc08g005090.1 | Unknown Protein (AHRD V1)                                                                                                                              | -1.04 | 2.72E-03 | Suppressor protein srp40                                                       |                                    |
| Solyc12g006530.1 | Cycloartenol synthase (AHRD V1 ***- D7LA92_ARALY); Interpro domain(s) IPR018333 Squalene cyclase                                                       | -1.04 | 2.90E-06 | Beta-amyrin synthase                                                           | GO:0003824                         |
| Solyc12g011410.1 | Unknown Protein (AHRD V1)                                                                                                                              | -1.04 | 1.47E-04 | Unknown Protein                                                                |                                    |
| Solyc12g096710.1 | Receptor like kinase, RLK                                                                                                                              | -1.04 | 4.02E-04 | Probably inactive leucine-rich repeat receptor-like protein kinase             | GO:0004675; GO:0006468             |
| Solyc03g033410.2 | Ubiquitin-conjugating enzyme E2 10 (AHRD V1 UBC10_ARATH); contains Interpro domain(s) IPR000608 Ubiquitin-conjugating enzyme, E2                       | -1.03 | 9.21E-05 | Ubiquitin-conjugating enzyme e2 10                                             | GO:0019787; GO:0043687; GO:0051246 |
| Solyc06g008300.2 | LRR receptor-like serine/threonine-protein kinase, RLP                                                                                                 | -1.03 | 4.47E-04 | Low quality protein; probable leucine-rich repeat receptor-like protein kinase | GO:0005515                         |
| Solyc07g042630.2 | Beta-Amyrin Synthase (AHRD V1 **** O82146_PANGI); Interpro domain(s) IPR018333 Squalene cyclase                                                        | -1.03 | 1.36E-05 | Lupeol synthase                                                                | GO:0003824                         |
| Solyc07g065160.2 | Pirin (AHRD V1 ***- D7RJ70_CARPA); contains domain(s) IPR012093 Pirin                                                                                  | -1.03 | 3.60E-04 | Pirin-like protein                                                             | GO:0003712; GO:0005516             |
| Solyc11g066250.1 | Serine carboxypeptidase (AHRD V1 **** Q9XH61_9ASTR); Interpro domain(s) IPR001563 Peptidase S10, serine carboxypeptidase                               | -1.03 | 7.18E-05 | Serine carboxypeptidase-                                                       | GO:0004185; GO:0006508             |
| Solyc11g066860.1 | Os02g0448600 protein (Fragment) (AHRD V1 *--)                                                                                                          | -1.03 | 9.15E-06 | Unknown Protein                                                                |                                    |
| Solyc00g050130.1 | UDP-glucose glucosyltransferase (AHRD V1 **** D2KTV5_LOTJA); Interpro domain(s) IPR002213 UDP-glucuronosyl/UDP-glucosyltransferase                     | -1.02 | 1.93E-03 | Unknown Protein                                                                | GO:0008152; GO:0016758             |
| Solyc01g095720.2 | Lipase (AHRD V1 *- C1FIH0_9CHLO); contains domain(s) IPR002921 Lipase, class 3                                                                         | -1.02 | 1.06E-05 | Alpha beta-hydrolases superfamily protein                                      | GO:0004806; GO:0006629             |
| Solyc04g076990.2 | Receptor like kinase, RLK                                                                                                                              | -1.02 | 3.07E-06 | Receptor-like protein kinase haiku2                                            | GO:0005515; GO:0004675             |
| Solyc06g073500.2 | Unknown Protein (AHRD V1)                                                                                                                              | -1.02 | 4.31E-04 | Pentatricopeptide repeat superfamily protein                                   |                                    |
| Solyc01g080220.2 | Dienelactone hydrolase family protein (AHRD V1 D7L3C7_ARALY); contains Interpro domain(s) IPR002925 Dienelactone hydrolase                             | -1.01 | 1.03E-06 | Endo- -beta-d-glucanase                                                        | GO:0016787                         |
| Solyc02g079930.2 | Phosphosulfolactate synthase (AHRD V1 ***- Q1ASZ8_RUBXD); Interpro domain(s) IPR003830 (2R)-phospho-3-sulpholactate synthase, ComA                     | -1.01 | 3.17E-04 | Phosphosulfolactate synthase-related protein                                   | GO:0019295                         |
| Solyc06g068600.2 | Phosphate import ATP-binding protein pstB 1 V1 **** B6UHM7_MAIZE); contains Interpro domain(s) IPR005670 Phosphate transport system permease protein 1 | -1.01 | 1.85E-05 | Abc transporter i family member 17                                             | GO:0005524; GO:0016887             |
| Solyc12g088940.1 | Protein serine/threonine kinase (AHRD V1 *- contains Interpro domain(s) IPR002290 Serine/threonine protein kinase                                      | -1.01 | 1.36E-03 | Mitogen-activated protein kinase kinase kinase yoda                            | GO:0006468                         |
| Solyc01g104690.2 | Unknown Protein (AHRD V1)                                                                                                                              | -1    | 8.37E-05 | Unknown protein                                                                |                                    |
| Solyc04g007000.1 | Ethylene-responsive transcription factor 4 (AHRD V1 ERF78_ARATH); contains Interpro domain(s) IPR003340 Transcriptional factor B3                      | -1    | 4.48E-04 | Ap2 erf and b3 domain-containing transcription factor rav1                     | GO:0003700; GO:0006355             |
| Solyc04g016230.2 | Glucosyltransferase (AHRD V1 **** D7URL8_9LAMI); contains domain(s) IPR002213 UDP-glucuronosyl/UDP-glucosyltransferase                                 | -1    | 4.15E-05 | Zeatin o-glucosyltransferase                                                   | GO:0008152; GO:0016758             |

|                  |                                                                                                                                                             |       |          |                                                             |                                                |
|------------------|-------------------------------------------------------------------------------------------------------------------------------------------------------------|-------|----------|-------------------------------------------------------------|------------------------------------------------|
| Solyc06g051940.2 | Protein phosphatase 2C (AHRD V1 **** contains Interpro domain(s) IPR015655<br>Protein phosphatase 2C                                                        | -1    | 2.72E-04 | Probable protein phosphatase 2c 51                          | GO:0003824; GO:0004722; GO:0008022             |
| Solyc06g062460.2 | BHLH transcription factor-like (AHRD V1 *--* contains Interpro domain(s) IPR001092<br>Basic helix-loop-helix dimerisation region bHLH                       | -1    | 1.35E-04 | Transcription factor bhlh87-                                | GO:0005634; GO:0030528; GO:0045449             |
| Solyc04g081770.2 | GDSL esterase/lipase At5g42170 (AHRD V1 ***- contains Interpro domain(s) IPR001087 Lipase, GDSL                                                             | -0.99 | 1.38E-06 | Gdsl esterase lipase exl3                                   | GO:0006629; GO:0016788                         |
| Solyc05g013630.1 | Unknown protein (Fragment) (AHRD V1 ***-                                                                                                                    | -0.99 | 1.70E-04 | Cp-interacting protein-l                                    |                                                |
| Solyc08g069060.2 | Beta-1 3-galactosyltransferase 6 (AHRD V1 **** contains Interpro domain(s) IPR002659 Glycosyl transferase, family 31                                        | -0.99 | 4.49E-04 | Beta- -galactosyltransferase 7                              | GO:0006486; GO:0008378; GO:0016020             |
| Solyc12g019740.1 | Thioredoxin family protein (AHRD V1 ***- contains Interpro domain(s) IPR015467<br>Thioredoxin, core                                                         | -0.99 | 9.18E-04 | Thioredoxin-like 1- chloroplastic                           | GO:0045454; GO:0016671                         |
| Solyc12g044950.1 | Omega-6 fatty acid desaturase (AHRD V1 Q461Q1_HEVBR); contains Interpro domain(s) IPR005804 Fatty acid desaturase, type 1                                   | -0.99 | 1.82E-03 | Omega-6 fatty acid endoplasmic reticulum isozyme 2          | GO:0006629; GO:0016491                         |
| Solyc12g098190.1 | F-box protein PP2-B1 (AHRD V1 ***- contains Interpro domain(s) IPR001810 Cyclin-like F-box                                                                  | -0.99 | 1.24E-03 | F-box protein pp2-b10                                       |                                                |
| Solyc06g051020.2 | Peptide-N4-(N-acetyl-beta-glucosaminyl)asparagine amidase A (AHRD V1 *-                                                                                     | -0.98 | 2.95E-05 | Peptide-n4-(n-acetyl-beta-glucosaminyl)asparagine amidase a |                                                |
| Solyc06g053670.1 | Enoyl-CoA hydratase/isomerase family protein (AHRD V1 D7MH17_ARALY); contains Interpro domain(s) IPR001753 Crotonase, core                                  | -0.98 | 3.79E-04 | Enoyl- hydratase domain-containing protein mitochondrial    | GO:0003824; GO:0008152                         |
| Solyc06g071820.2 | Speckle-type poz protein (AHRD V1 *--- contains Interpro domain(s) IPR000197 Zinc finger, TAZ-type                                                          | -0.98 | 2.27E-04 | Btb poz and taz domain-containing protein 1                 | GO:0005515                                     |
| Solyc12g094620.1 | Catalase (AHRD V1 ***- Q2PYW5_SOLTU); contains domain(s) IPR018028<br>Catalase related subgroup                                                             | -0.98 | 2.35E-03 | Catalase isozyme 1                                          | GO:0004096; GO:0005506; GO:0006979; GO:0020037 |
| Solyc02g079960.2 | Thioredoxin h (AHRD V1 ***- Q9XF70_HEVBR); Interpro domain(s) IPR015467<br>Thioredoxin, core                                                                | -0.97 | 3.65E-04 | Thioredoxin-like protein cxxs1                              | GO:0045454                                     |
| Solyc04g007540.1 | Multidrug resistance protein mdtK (AHRD V1 MDTK_ENT38); contains Interpro domain(s) IPR015521 MATE family transporter related protein                       | -0.97 | 3.01E-04 | Mate efflux family protein 5-                               | GO:0006855; GO:0015238; GO:0015297; GO:0016020 |
| Solyc04g053130.2 | LHC-related protein (AHRD V1 **-- D8SUY7_SELML)                                                                                                             | -0.97 | 1.30E-05 | Stress enhanced protein chloroplastic                       | GO:0016168                                     |
| Solyc04g077230.1 | Unknown Protein (AHRD V1)                                                                                                                                   | -0.97 | 2.55E-04 | Unknown protein                                             |                                                |
| Solyc09g007980.1 | Unknown Protein (AHRD V1)                                                                                                                                   | -0.97 | 2.87E-03 | Unknown protein                                             |                                                |
| Solyc01g008420.2 | Mate efflux family protein (AHRD V1 D7KHQ9_ARALY); contains Interpro domain(s) IPR002528 Multi antimicrobial extrusion protein MatE                         | -0.96 | 2.94E-04 | Mate efflux family protein 1                                | GO:0006855; GO:0015238; GO:0015297; GO:0016020 |
| Solyc03g098000.2 | At1g32160/F3C3_6 (AHRD V1 ***- Q9FVR1_ARATH); contains domain(s) IPR008479 Protein of unknown function DUF760                                               | -0.96 | 1.12E-03 | Alanine--trna ligase                                        |                                                |
| Solyc03g111310.2 | AKIN gamma (AHRD V1 **-- Q7XY00_MEDTR); Interpro domain(s) IPR000644<br>Cystathionine beta-synthase, core                                                   | -0.96 | 1.04E-05 | Snf1-related protein kinase regulatory subunit gamma-1      |                                                |
| Solyc03g116570.2 | YuxK (AHRD V1 **-- B4AHQ1_BACPU); contains domain(s) IPR007263 Putative thiol-disulphide oxidoreductase DCC                                                 | -0.96 | 1.43E-04 | Dcc family protein chloroplastic                            |                                                |
| Solyc04g071900.2 | Peroxidase (AHRD V1 **** Q94IQ1_TOBAC); contains domain(s) IPR002016 Haem peroxidase, plant/fungal/bacterial                                                | -0.96 | 1.03E-04 | Peroxidase 12                                               | GO:0004601; GO:0006979; GO:0020037; GO:0055114 |
| Solyc08g028690.2 | Tasselseed2-like short-chain dehydrogenase/reductase (Fragment) (AHRD V1 Q2EFE2_9POAL); contains Interpro domain(s) IPR002347 Glucose/ribitol dehydrogenase | -0.96 | 2.85E-04 | Secoisolaricresinol dehydrogenase                           | GO:0008152; GO:0016491                         |
| Solyc01g086870.2 | BHLH transcription factor (AHRD V1 *-** contains Interpro domain(s) IPR011598<br>Helix-loop-helix DNA-binding                                               | -0.95 | 1.51E-04 | Transcription factor bhlh130                                | GO:0005634; GO:0030528; GO:0045449             |
| Solyc01g106400.2 | Peptide methionine sulfoxide reductase msrB (AHRD ***- B6T2C6_MAIZE); contains Interpro domain(s) IPR002579 Methionine sulphoxide reductase B               | -0.95 | 1.73E-05 | Peptide methionine sulfoxide reductase b5                   | GO:0055114                                     |
| Solyc02g063440.2 | Unknown Protein (AHRD V1)                                                                                                                                   | -0.95 | 1.64E-03 | Unknown protein                                             | GO:0005488                                     |
| Solyc02g079430.2 | CONSTANS-like zinc finger protein (AHRD V1 D0EP04_SOYBN); contains Interpro domain(s) IPR000315 Zinc finger, B-box                                          | -0.95 | 2.46E-04 | Zinc finger protein constans                                | GO:0005622; GO:0008270                         |
| Solyc02g085940.2 | Unknown Protein (AHRD V1)                                                                                                                                   | -0.95 | 9.63E-06 | Ribulose bisphosphate carboxylase                           |                                                |

|                  |                                                                                                                                                             |       |          |                                                                        |                                                |
|------------------|-------------------------------------------------------------------------------------------------------------------------------------------------------------|-------|----------|------------------------------------------------------------------------|------------------------------------------------|
| Solyc02g093750.2 | Ring zinc finger protein (Fragment) (AHRD *--- A6MH00_LILLO); contains Interpro domain(s) IPR008166 Protein of unknown function DUF23                       | -0.95 | 9.67E-04 | Upf0392 protein rcom                                                   |                                                |
| Solyc04g074850.2 | Multidrug resistance protein mdtK (AHRD V1 MDTK_YERP3); contains Interpro domain(s) IPR002528 Multi antimicrobial extrusion protein MatE                    | -0.95 | 7.72E-05 | Protein transparent testa 12                                           | GO:0006855; GO:0015238; GO:0015297; GO:0016020 |
| Solyc04g080640.1 | Genomic DNA chromosome 5 TAC clone (AHRD V1 ***- Q9FJZ5_ARATH)                                                                                              | -0.95 | 1.69E-03 | Unknown protein                                                        |                                                |
| Solyc09g089730.2 | 1-aminocyclopropane-1-carboxylate oxidase-like protein (AHRD V1 **-- contains Interpro domain(s) IPR005123 Oxoglutarate and iron-dependent oxygenase        | -0.95 | 1.55E-03 | 1-aminocyclopropane-1-carboxylate oxidase homolog                      | GO:0016491                                     |
| Solyc11g010700.1 | Receptor-like protein kinase (AHRD V1 *-*- contains Interpro domain(s) IPR001245 Tyrosine protein kinase                                                    | -0.95 | 7.69E-05 | U-box domain-containing protein 50                                     | GO:0006468                                     |
| Solyc01g102960.2 | class IV heat shock protein (AHRD ***- B6T3F5_MAIZE); contains Interpro domain(s) IPR002068 Heat shock protein Hsp20                                        | -0.94 | 2.14E-03 | Kda class iv heat shock                                                |                                                |
| Solyc01g106000.2 | Isochorismatase hydrolase (AHRD V1 ***- B6TNR9_MAIZE); Interpro domain(s) IPR000868 Isochorismatase-like                                                    | -0.94 | 1.70E-05 | Nicotinamidase 1                                                       | GO:0003824; GO:0008152                         |
| Solyc02g071020.2 | Unknown Protein (AHRD V1)                                                                                                                                   | -0.94 | 3.23E-05 | Chlorophyll a-b binding protein chloroplastic                          |                                                |
| Solyc02g086880.2 | Formate dehydrogenase (AHRD V1 **** Q5NE18_SOLLC); Interpro domain(s) IPR006140 D-isomer specific 2-hydroxyacid dehydrogenase, NAD-binding                  | -0.94 | 2.21E-05 | Formate mitochondrial                                                  | GO:0003824; GO:0005488; GO:0008152             |
| Solyc03g112060.2 | Quinolinate synthase A (AHRD V1 *-*- contains Interpro domain(s) IPR003808 Fe-S metabolism associated SufE                                                  | -0.94 | 9.18E-04 | Quinolinate chloroplastic                                              | GO:0008987; GO:0009435                         |
| Solyc04g057940.2 | U-box domain-containing protein (AHRD V1 *-*- contains Interpro domain(s) IPR017986 WD40 repeat, region                                                     | -0.94 | 7.66E-05 | E3 ubiquitin-protein ligase lin-1                                      | GO:0005488                                     |
| Solyc04g072240.2 | Oxidoreductase family protein (AHRD V1 ***- contains Interpro domain(s) IPR016040 NAD(P)-binding domain                                                     | -0.94 | 1.06E-04 | Uncharacterized oxidoreductase                                         | GO:0003824; GO:0005488; GO:0008152             |
| Solyc05g006420.2 | Two-component response regulator ARR3 (AHRD V1 B6TSM4_MAIZE); contains Interpro domain(s) IPR001789 Signal transduction response regulator, receiver region | -0.94 | 1.74E-06 | Two-component response regulator arr5                                  | GO:0000156; GO:0000160; GO:0006355             |
| Solyc10g012080.2 | MRNA clone RAFL21-79-C21 (AHRD V1 **-- contains Interpro domain(s) IPR006461 Protein of unknown function Cys-rich                                           | -0.94 | 8.35E-04 | Pollen-specific leucine-rich repeat extensin-like protein 3            |                                                |
| Solyc10g076550.1 | Receptor-like protein kinase At3g21340 (AHRD V1 RLK6_ARATH); contains Interpro domain(s) IPR002290 Serine/threonine protein kinase                          | -0.94 | 2.55E-04 | Wall-associated receptor kinase 2                                      | GO:0004672; GO:0005524; GO:0006468             |
| Solyc11g066740.1 | Os12g0283800 protein (Fragment) (AHRD V1 *-*-                                                                                                               | -0.94 | 7.41E-04 | Protein reticulata-related chloroplastic                               |                                                |
| Solyc01g094790.2 | Cysteine synthase (AHRD V1 ***- Q9FS29_SOLTU); Interpro domain(s) IPR005859 Cysteine synthase A                                                             | -0.93 | 5.66E-04 | Bifunctional l-3-cyanoalanine synthase cysteine synthase mitochondrial | GO:0004124; GO:0006535                         |
| Solyc02g063450.2 | Hypothetical YFW family protein 5 (AHRD *--- Q5AP84_CANAL); contains Interpro domain(s) IPR009836 Protein of unknown function DUF1399                       | -0.93 | 4.63E-05 | Unknown protein                                                        |                                                |
| Solyc02g083280.2 | Thiosulfate sulfurtransferase/rhodanese-like domain-containing protein 1 (AHRD *-*- TSTD1_HUMAN); contains Interpro domain(s) IPR001763 Rhodanese-like      | -0.93 | 7.48E-04 | Thiosulfate sulfurtransferase chloroplastic-                           | GO:0004792                                     |
| Solyc04g079220.1 | Patatin-like protein 1 (AHRD V1 ***- contains Interpro domain(s) IPR002641 Patatin                                                                          | -0.93 | 4.23E-04 | Patatin-like protein 2                                                 | GO:0006629                                     |
| Solyc07g006480.2 | LRR receptor-like serine/threonine-protein kinase FE1 1 V1 **** FE1_ARATH); contains Interpro domain(s) IPR002290 Serine/threonine protein kinase           | -0.93 | 3.01E-04 | Probably inactive leucine-rich repeat receptor-like protein kinase     | GO:0004675; GO:0006468                         |
| Solyc07g055470.2 | Cytochrome P450                                                                                                                                             | -0.93 | 4.11E-05 | Cytochrome p450 cyp72a219                                              |                                                |
| Solyc02g078210.2 | Ubiquitin-conjugating enzyme 22 (AHRD V1 ***- contains Interpro domain(s) IPR000608 Ubiquitin-conjugating enzyme, E2                                        | -0.92 | 6.78E-05 | Probable ubiquitin-conjugating enzyme e2 24                            | GO:0019787; GO:0043687; GO:0051246             |
| Solyc03g116700.2 | Blue copper protein (AHRD V1 ***- contains Interpro domain(s) IPR003245 Plastocyanin-like                                                                   | -0.92 | 3.48E-04 | Cucumber peeling cupredoxin                                            | GO:0005507; GO:0009055                         |
| Solyc04g079230.2 | Patatin-like protein 1 (AHRD V1 ***- contains Interpro domain(s) IPR002641 Patatin                                                                          | -0.92 | 6.57E-06 | Patatin-like protein 2                                                 | GO:0006629                                     |
| Solyc05g013810.2 | Glycosyl hydrolase family 5 protein/cellulase (AHRD **-- A8NVS8_COPC7); contains Interpro domain(s) IPR001547 Glycoside hydrolase, family 5                 | -0.92 | 8.25E-05 | Cellulase protein                                                      | GO:0003824; GO:0005975; GO:0043169             |
| Solyc06g019170.2 | Gamma-glutamyl phosphate reductase (AHRD V1 ***- contains Interpro domain(s) IPR005766 Delta l-pyrroline-5-carboxylate synthetase                           | -0.92 | 7.95E-04 | Delta-1-pyrroline-5-carboxylate synthase                               | GO:0004349; GO:0005737; GO:0006561             |

|                  |                                                                                                                                                               |       |          |                                                      |                                                            |
|------------------|---------------------------------------------------------------------------------------------------------------------------------------------------------------|-------|----------|------------------------------------------------------|------------------------------------------------------------|
| Solyc09g074550.2 | UPF0497 membrane protein 6 (AHRD V1 U4976_VITVI); contains Interpro domain(s) IPR006459 Uncharacterised protein family UPF0497, trans-membrane plant subgroup | -0.92 | 1.50E-03 | Casp-like protein 1e2                                | GO:0005515                                                 |
| Solyc11g028080.1 | Unknown Protein (AHRD V1)                                                                                                                                     | -0.92 | 4.11E-04 | Unknown protein                                      |                                                            |
| Solyc12g099190.1 | Invertase inhibitor (AHRD V1 ***- C1KBP2_SOLTU); Interpro domain(s) IPR006501 Pectinesterase inhibitor                                                        | -0.92 | 1.12E-03 | Invertase inhibitor                                  | GO:0004857; GO:0030599                                     |
| Solyc01g080870.2 | Peptide transporter-like protein (AHRD V1 **-* contains Interpro domain(s) IPR000109 TGF-beta receptor, type I/II extracellular region                        | -0.91 | 1.80E-04 | Protein nrt1 ptr family                              | GO:0016020; GO:0042936                                     |
| Solyc04g076980.2 | LRR receptor-like serine/threonine-protein kinase, RLP                                                                                                        | -0.91 | 1.49E-04 | Receptor-like protein kinase haiku2                  | GO:0005515; GO:0004675                                     |
| Solyc01g099750.2 | Heparan-alpha-glucosaminide N-acetyltransferase (AHRD V1 **-- D2QUR2_SPILD); Interpro domain(s) IPR019259 Protein of unknown function DUF2261, transmembrane  | -0.9  | 9.22E-04 | Heparan-alpha-glucosaminide n-acetyltransferase      |                                                            |
| Solyc03g006410.2 | Plant-specific domain TIGR01615 family protein (AHRD ***- B6UDN7_MAIZE); contains Interpro domain(s) IPR006502 Protein of unknown function DUF506, plant      | -0.9  | 7.75E-04 | Unknown protein                                      |                                                            |
| Solyc03g114150.2 | Aldehyde dehydrogenase (AHRD V1 **** Q1AFF6_9ROSI); Interpro domain(s) IPR015590 Aldehyde dehydrogenase                                                       | -0.9  | 1.52E-04 | Aldehyde dehydrogenase family 2 member mitochondrial | GO:0008152; GO:0016491                                     |
| Solyc04g009960.2 | L-allo-threonine aldolase (AHRD V1 **** D7RJ69_CARPA); Interpro domain(s) IPR001597 Aromatic amino acid beta-eliminating lyase/threonine aldolase             | -0.9  | 1.01E-04 | Probable low-specificity l-threonine aldolase 1      | GO:0003824; GO:0030170                                     |
| Solyc09g098030.2 | Cytochrome P450                                                                                                                                               | -0.9  | 2.48E-06 | Geraniol 8-hydroxylase                               | GO:0004497; GO:0005506; GO:0020037                         |
| Solyc12g088250.1 | Serine carboxypeptidase 1 (AHRD V1 ***- contains Interpro domain(s) IPR001563 Peptidase S10, serine carboxypeptidase                                          | -0.9  | 4.45E-05 | Serine carboxypeptidase                              | GO:0004185; GO:0006508                                     |
| Solyc02g077590.1 | Homeobox-leucine zipper-like protein (AHRD V1 *-*- contains Interpro domain(s) IPR001356 Homeobox                                                             | -0.89 | 1.00E-05 | Homeobox-leucine zipper protein athb-52              | GO:0003677; GO:0045449                                     |
| Solyc03g097930.2 | Unknown Protein (AHRD V1)                                                                                                                                     | -0.89 | 1.26E-03 | Potassium channel skor                               |                                                            |
| Solyc04g008330.1 | Glucosyltransferase (AHRD V1 **** Q2VA65_SOYBN); contains domain(s) IPR002213 UDP-glucuronosyl/UDP-glucosyltransferase                                        | -0.89 | 1.81E-05 | Zeatin o-glucosyltransferase                         | GO:0008152; GO:0016758                                     |
| Solyc09g011660.2 | Universal stress protein 1 (AHRD V1 B0YQX0_GOSAR); contains Interpro domain(s) IPR006016 UspA                                                                 | -0.89 | 7.61E-04 | Universal stress protein a-like protein              | GO:0006950                                                 |
| Solyc10g080610.1 | Kelch-like protein 14 (AHRD V1 ***- contains Interpro domain(s) IPR015915 Kelch-type beta propeller                                                           | -0.89 | 1.74E-03 | F-box kelch-repeat protein                           |                                                            |
| Solyc12g042380.1 | MtN19-like protein (AHRD V1 ***- Q64EX4_PEA); Interpro domain(s) IPR011692 Stress up-regulated Nod 19                                                         | -0.89 | 6.24E-04 | 19-like isoform 2                                    |                                                            |
| Solyc02g068080.2 | Voltage-gated chloride channel (AHRD V1 **** contains Interpro domain(s) IPR002251 Chloride channel plant CLC                                                 | -0.88 | 5.57E-04 | Chloride channel protein clc-b                       | GO:0016020; GO:0005247                                     |
| Solyc02g082060.1 | PPPDE peptidase domain-containing protein 1 (AHRD *--- PPDE1_XENLA); contains Interpro domain(s) IPR008580 Protein of unknown function DUF862, eukaryotic     | -0.88 | 5.26E-05 | Desi-like protein                                    |                                                            |
| Solyc04g011670.2 | BZIP transcription factor (AHRD V1 **** contains Interpro domain(s) IPR011616 bZIP transcription factor, bZIP-1                                               | -0.88 | 2.18E-04 | Tgacg-sequence-specific dna-binding protein tga-1a   | GO:0003700; GO:0005634; GO:0006355; GO:0043565; GO:0046983 |
| Solyc04g025040.1 | Unknown Protein (AHRD V1)                                                                                                                                     | -0.88 | 7.27E-04 | Rna-binding protein fus                              |                                                            |
| Solyc05g015800.2 | Acetyl coenzyme A cis-3-hexen-1-ol acetyl transferase V1 **-* Q9SRQ2_ARATH); contains Interpro domain(s) IPR003480 Transferase                                | -0.88 | 2.09E-05 | Methanol o-anthraniloyltransferase                   | GO:0016747                                                 |
| Solyc08g076450.2 | 3-beta hydroxysteroid dehydrogenase/isomerase family protein (AHRD ***- B6TV09_MAIZE); contains Interpro domain(s) IPR016040 NAD(P)-binding domain            | -0.88 | 9.89E-04 | Nad -binding rossmann-fold superfamily protein       | GO:0003824; GO:0005488; GO:0008152                         |
| Solyc09g007270.2 | Ascorbate peroxidase (AHRD V1 **** B9VRH6_CITMA); Interpro domain(s) IPR002207 Plant ascorbate peroxidase                                                     | -0.88 | 2.71E-05 | L-ascorbate peroxidase cytosolic                     | GO:0004601; GO:0006979; GO:0020037; GO:0055114             |
| Solyc10g007070.2 | CT099 (Fragment) (AHRD V1 *--- Q30GY4_9SOLN); Interpro domain(s) IPR003245 Plastocyanin-like                                                                  | -0.88 | 2.41E-03 | Early nodulin-like protein 2                         | GO:0009055                                                 |
| Solyc11g007200.1 | Copper chaperone (AHRD V1 *-*- D3GC04_9ROSI); Interpro domain(s) IPR006121 Heavy metal transport/detoxification protein                                       | -0.88 | 7.15E-06 | Copper transport protein cch-                        | GO:0030001; GO:0046872                                     |
| Solyc01g108300.2 | Myb family transcription factor (AHRD V1 D7LQI3_ARALY); contains Interpro domain(s) IPR006447 Myb-like DNA-binding region, SHAQKYF class                      | -0.87 | 2.31E-04 | Two-component response regulator-like aprr2          | GO:0003677; GO:0045449                                     |

|                  |                                                                                                                                                          |       |          |                                                                         |                                    |
|------------------|----------------------------------------------------------------------------------------------------------------------------------------------------------|-------|----------|-------------------------------------------------------------------------|------------------------------------|
| Solyc07g054760.1 | Wound induced protein (AHRD V1 ***-                                                                                                                      | -0.87 | 2.83E-03 | Wound induced protein                                                   |                                    |
| Solyc11g013150.1 | GRAS family transcription factor (AHRD V1 B9H7C5_POPTR); contains Interpro domain(s) IPR005202 GRAS transcription factor                                 | -0.87 | 3.61E-04 | Nodulation-signaling pathway 2 protein                                  |                                    |
| Solyc04g079210.2 | Patatin-like protein 1 (AHRD V1 ***- contains Interpro domain(s) IPR016035 Acyl transferase/acyl hydrolase/lysophospholipase                             | -0.86 | 1.53E-05 | Patatin-like protein 2                                                  | GO:0008152                         |
| Solyc04g079410.2 | Single-stranded DNA binding protein (AHRD V1 D7KGI0_ARALY); contains Interpro domain(s) IPR000424 Primosome PriB/single-strand DNA-binding               | -0.86 | 2.80E-03 | Protein mitochondrial                                                   | GO:0003697                         |
| Solyc05g005920.2 | Peptide transporter (AHRD V1 ***- A6YJX4_9MAGN); Interpro domain(s) IPR000109 TGF-beta receptor, type I/II extracellular region                          | -0.86 | 5.80E-04 | Protein nrt1 ptr family                                                 | GO:0080054; GO:0016020; GO:0042936 |
| Solyc05g010040.2 | Unknown Protein (AHRD V1)                                                                                                                                | -0.86 | 1.02E-03 | Unknown protein                                                         |                                    |
| Solyc07g044980.2 | NPR1-1 protein (Fragment) (AHRD V1 ***- contains Interpro domain(s) IPR013069 BTB/POZ                                                                    | -0.86 | 2.20E-05 | Regulatory protein npr3-like isoform x1                                 | GO:0005515                         |
| Solyc07g063750.2 | Serine/threonine-protein kinase receptor (AHRD V1 **** contains Interpro domain(s) IPR002290 Serine/threonine protein kinase                             | -0.85 | 9.38E-05 | G-type lectin s-receptor-like serine threonine-protein kinase at4g27290 | GO:0048544                         |
| Solyc09g011560.2 | Glutathione S-transferase-like protein (AHRD V1 **** contains Interpro domain(s) IPR004046 Glutathione S-transferase, C-terminal                         | -0.85 | 4.38E-04 | Probable glutathione s-transferase                                      | GO:0004364                         |
| Solyc09g090110.2 | Actin depolymerizing factor 6 (AHRD V1 Q8H9D5_SOLTU); contains Interpro domain(s) IPR002108 Actin-binding, cofilin/tropomyosin type                      | -0.85 | 1.38E-05 | Actin-depolymerizing factor                                             | GO:0003779; GO:0005622             |
| Solyc12g006450.1 | Aminotransferase-like protein (AHRD V1 ***- Q9LIE2_ARATH); Interpro domain(s) IPR005814 Aminotransferase class-III                                       | -0.85 | 1.28E-05 | Gamma aminobutyrate transaminase chloroplastic isoform x2               | GO:0003824; GO:0030170             |
| Solyc04g078200.2 | Gibberellin-regulated family protein (AHRD V1 **-- contains Interpro domain(s) IPR003854 Gibberellin regulated protein                                   | -0.84 | 1.47E-04 | Snakin-1                                                                |                                    |
| Solyc09g097780.2 | Glycine-rich protein (AHRD V1 *- D2K2U2_TOBAC); Interpro domain(s) IPR010800 Glycine rich                                                                | -0.84 | 6.78E-05 | Glycine-rich protein precursor                                          |                                    |
| Solyc10g049970.1 | Kynurenine formamidase (AHRD V1 **-- D7BCL0_MEISD); Interpro domain(s) IPR007325 Putative cyclase                                                        | -0.84 | 1.64E-05 | Kynurenine formamidase                                                  | GO:0009975; GO:0004061             |
| Solyc02g030300.2 | Serine/threonine-protein kinase receptor (AHRD V1 **** contains Interpro domain(s) IPR002290 Serine/threonine protein kinase                             | -0.83 | 1.81E-04 | G-type lectin s-receptor-like serine threonine-protein kinase at4g27290 | GO:0048544                         |
| Solyc03g025720.2 | Long-chain-fatty-acid--CoA ligase (AHRD V1 **** C3JN12_RHOER); Interpro domain(s) IPR000873 AMP-dependent synthetase and ligase                          | -0.83 | 5.81E-04 | 4-coumarate-- ligase                                                    | GO:0003824; GO:0008152             |
| Solyc07g052950.2 | Unknown Protein (AHRD V1)                                                                                                                                | -0.83 | 4.98E-04 | Unknown protein                                                         |                                    |
| Solyc07g062970.2 | Serine/threonine phosphatase family protein (AHRD V1 C1E0J1_9CHLO); contains Interpro domain(s) IPR015655 Protein phosphatase 2C                         | -0.83 | 7.49E-04 | Probable protein phosphatase 2c 39                                      | GO:0003824; GO:0004722             |
| Solyc07g063910.2 | Unknown Protein (AHRD V1)                                                                                                                                | -0.83 | 7.78E-04 | Unknown protein                                                         |                                    |
| Solyc09g072590.2 | Actin-depolymerizing factor 6 (AHRD V1 **** contains Interpro domain(s) IPR002108 Actin-binding, cofilin/tropomyosin type                                | -0.83 | 8.96E-05 | Actin-depolymerizing factor                                             | GO:0003779; GO:0005622             |
| Solyc09g075020.2 | Multidrug resistance protein ABC transporter family V1 **-- B9GS96_POPTR); contains Interpro domain(s) IPR001140 ABC transporter, transmembrane region   | -0.83 | 2.78E-03 | Abc transporter c family member 14-                                     | GO:0005524; GO:0016887             |
| Solyc09g089860.2 | Nodulin-like protein (AHRD V1 ***- B6TRP3_MAIZE); Interpro domain(s) IPR000620 Protein of unknown function DUF6, transmembrane                           | -0.83 | 2.00E-03 | Wat1-related protein at5g07050-                                         | GO:0016020                         |
| Solyc11g069450.1 | Arabidopsis thaliana genomic DNA chromosome 5 clone MOK16 (AHRD V1 **-- Q9LYW2_ARATH); contains Interpro domain(s) IPR007608 Protein of unknown function | -0.83 | 1.04E-03 | Unknown protein                                                         | GO:0005515                         |
| Solyc12g042470.1 | Reductase 2 (AHRD V1 **** Q6TY50_HYDMC); Interpro domain(s) IPR020471 Aldo/keto reductase subgroup                                                       | -0.83 | 3.91E-04 | Methylecgonone reductase-                                               | GO:0016491; GO:0055114             |
| Solyc12g089220.1 | Wound responsive protein (Fragment) (AHRD V1 A6N0L4_ORYSI); contains Interpro domain(s) IPR003729 Protein of unknown function DUF151                     | -0.83 | 4.18E-04 | Bifunctional nuclease 1-                                                |                                    |
| Solyc12g099600.1 | Protein phosphatase 2C containing protein (AHRD ***- B6T998_MAIZE); contains Interpro domain(s) IPR015655 Protein phosphatase 2C                         | -0.83 | 7.85E-05 | Probable protein phosphatase 2c 40                                      | GO:0003824                         |
| Solyc02g065000.1 | Calmodulin-like protein (AHRD V1 ***- Q67TZ4_ORYSJ); Interpro domain(s) IPR011992 EF-Hand type                                                           | -0.82 | 9.35E-04 | Calmodulin-like protein 1                                               | GO:0005509                         |

|                  |                                                                                                                                                                              |       |          |                                                          |                                    |
|------------------|------------------------------------------------------------------------------------------------------------------------------------------------------------------------------|-------|----------|----------------------------------------------------------|------------------------------------|
| Solyc02g081550.2 | ATP-dependent Zn protease cell division protein homolog (AHRD V1 **** B2XTF7_HETA2); contains Interpro domain(s) IPR001315 Caspase Recruitment IPR003960 ATPase, AAA-type,   | -0.82 | 1.89E-03 | Atp-dependent zinc metalloprotease ftsh chloroplastic-   | GO:0005515; GO:0005622; GO:0042981 |
| Solyc04g005160.1 | 6-phosphogluconate dehydrogenase decarboxylating (AHRD V1 **** contains Interpro domain(s) IPR006113 6-phosphogluconate dehydrogenase, decarboxylating                       | -0.82 | 3.07E-05 | 6-phosphogluconate decarboxylating 3                     | GO:0004616; GO:0016491; GO:0042802 |
| Solyc04g016430.2 | Cytokinin oxidase/dehydrogenase 1 (AHRD V1 **** contains Interpro domain(s) IPR015345 Cytokinin dehydrogenase 1, FAD and cytokinin binding                                   | -0.82 | 3.52E-04 | Cytokinin dehydrogenase 1                                | GO:0016491; GO:0050660             |
| Solyc05g006740.2 | Glutathione S-transferase (AHRD V1 **** A3FF38_9CARY); Interpro domain(s) IPR004046 Glutathione S-transferase, C-terminal                                                    | -0.82 | 5.61E-04 | Glutathione s-transferase u17                            | GO:0004364                         |
| Solyc05g010450.1 | Unknown Protein (AHRD V1)                                                                                                                                                    | -0.82 | 2.95E-04 | Micronuclear linker histone poly                         |                                    |
| Solyc07g062060.2 | Peptide methionine sulfoxide reductase msrB (AHRD ***- B6T2N3_MAIZE); contains Interpro domain(s) IPR002579 Methionine sulphoxide reductase B                                | -0.82 | 4.34E-04 | Peptide methionine sulfoxide reductase chloroplastic     | GO:0055114                         |
| Solyc11g064920.1 | Dihydropyrimidinase (AHRD V1 **-* D7M4H1_ARALY); contains domain(s) IPR011778 D-hydantoinase                                                                                 | -0.82 | 5.97E-05 | Dihydropyrimidinase                                      | GO:0016810                         |
| Solyc12g096030.1 | Mitochondrial carrier-like protein (AHRD V1 ***- contains Interpro domain(s) IPR002067 Mitochondrial carrier protein                                                         | -0.82 | 1.64E-03 | Solute carrier family 25 member 44                       | GO:0016020                         |
| Solyc01g090680.2 | Genomic DNA chromosome 5 TAC clone (AHRD V1 *-*- Q9FKH0_ARATH)                                                                                                               | -0.81 | 2.31E-03 | Unknown protein                                          |                                    |
| Solyc01g087620.2 | Unknown Protein (AHRD V1)                                                                                                                                                    | -0.8  | 7.35E-05 | Ubiquitin-like protein 5                                 |                                    |
| Solyc04g014530.1 | Ethylene responsive transcription factor 1a (AHRD *-*- C0J9I9_9ROSA); contains Interpro domain(s) IPR001471 Pathogenesis-related transcriptional factor and ERF, DNA-binding | -0.8  | 1.66E-03 | Ethylene-responsive transcription factor 1b              | GO:0003700; GO:0006355             |
| Solyc04g017720.2 | Gibberellin regulated protein (AHRD V1 **-- contains Interpro domain(s) IPR003854 Gibberellin regulated protein                                                              | -0.8  | 2.90E-03 | Protein gast1                                            |                                    |
| Solyc06g074940.2 | ATP-binding cassette protein (AHRD V1 ***- contains Interpro domain(s) IPR003439 ABC transporter-like                                                                        | -0.8  | 8.53E-04 | Abc transporter f family member 1                        | GO:0005524; GO:0016887             |
| Solyc08g067540.1 | Non-specific lipid-transfer protein (AHRD V1 ***- contains Interpro domain(s) IPR013770 Plant lipid transfer protein and hydrophobic protein, helical                        | -0.8  | 1.80E-04 | Non-specific lipid-transfer protein 1                    | GO:0006869                         |
| Solyc08g074490.2 | Regulatory protein (AHRD V1 **-- Q8LFS2_ARATH)                                                                                                                               | -0.8  | 1.27E-03 | Calcium-dependent protein kinase                         |                                    |
| Solyc10g083380.1 | Unknown Protein (AHRD V1); contains Interpro IPR004827 Basic-leucine zipper (bZIP) transcription factor                                                                      | -0.8  | 2.42E-03 | Bzip transcription factor family protein                 | GO:0003700; GO:0006355; GO:0043565 |
| Solyc00g289230.1 | Receptor protein kinase (AHRD V1 **** contains Interpro domain(s) IPR002290 Serine/threonine protein kinase                                                                  | -0.79 | 2.51E-03 | Unknown Protein                                          | GO:0004674; GO:0006468             |
| Solyc01g099840.2 | Auxin-repressed protein (AHRD V1 ***- B4FA62_MAIZE); Interpro domain(s) IPR008406 Dormancyauxin associated                                                                   | -0.79 | 8.37E-04 | Auxin-repressed kda                                      |                                    |
| Solyc03g082690.2 | U-box domain-containing protein (AHRD V1 *-*- contains Interpro domain(s) IPR011989 Armadillo-like helical                                                                   | -0.79 | 7.55E-04 | U-box domain-containing protein 44-                      | GO:0005488                         |
| Solyc03g112640.2 | CRAL/TRIO domain containing protein (AHRD V1 B6UD95_MAIZE); contains Interpro domain(s) IPR001251 Cellular retinaldehyde-binding/triple function, C-terminal                 | -0.79 | 1.57E-03 | Sec14p-like phosphatidylinositol transfer family protein | GO:0008526                         |
| Solyc05g052030.1 | Ethylene responsive transcription factor 1a (AHRD *-*- C0J9I9_9ROSA); contains Interpro domain(s) IPR001471 Pathogenesis-related transcriptional factor and ERF, DNA-binding | -0.79 | 2.25E-03 | Ethylene-responsive transcription factor erf106          | GO:0003700; GO:0006355             |
| Solyc08g068150.2 | BURP domain-containing protein (AHRD V1 **-- contains Interpro domain(s) IPR004873 BURP                                                                                      | -0.79 | 5.14E-04 | Dehydration-responsive protein rd22                      |                                    |
| Solyc09g061840.2 | 3-ketoacyl CoA thiolase 1 (AHRD V1 C8YNG6_PETHY); contains Interpro domain(s) IPR002155 Thiolase                                                                             | -0.79 | 9.93E-04 | 3-ketoacyl- thiolase peroxisomal                         | GO:0003824; GO:0008152             |
| Solyc09g090430.2 | Cyanate hydratase (AHRD V1 ***- B6TTW1_MAIZE); Interpro domain(s) IPR008076 Cyanase                                                                                          | -0.79 | 2.16E-04 | Cyanate hydratase                                        | GO:0008824; GO:0009439             |
| Solyc10g083860.1 | UDP-glucosyltransferase family 1 protein (AHRD V1 C6KI43_CITSI); contains Interpro domain(s) IPR002213 UDP-glucuronosyl/UDP-glucosyltransferase                              | -0.79 | 1.06E-04 | Udp-glycosyltransferase 73c6                             | GO:0008152; GO:0016758             |
| Solyc01g007920.2 | Isochorismatase family protein (AHRD V1 ***- contains Interpro domain(s) IPR000868 Isochorismatase-like                                                                      | -0.78 | 5.45E-04 | Isochorismatase hydrolase family protein                 | GO:0003824; GO:0008152             |
| Solyc01g009860.2 | NAC domain transcription factor (AHRD V1 Q5DM36_WHEAT); contains Interpro domain(s) IPR003441 No apical meristem (NAM) protein                                               | -0.78 | 9.71E-05 | Nac transcription factor 29                              | GO:0003677; GO:0045449             |



|                  |                                                                                                                                                                                                             |       |          |                                                                                           |                                                            |
|------------------|-------------------------------------------------------------------------------------------------------------------------------------------------------------------------------------------------------------|-------|----------|-------------------------------------------------------------------------------------------|------------------------------------------------------------|
| Solyc09g010140.1 | Arabidopsis thaliana genomic DNA chromosome 5 clone MOK16 (AHRD V1 *--- Q9LYW2_ARATH); contains Interpro domain(s) IPR007608 Protein of unknown function                                                    | -0.78 | 2.23E-03 | Probable protein kinase ddb                                                               |                                                            |
| Solyc11g011920.1 | Glutamate decarboxylase (AHRD V1 ***- Q8LKR4_TOBAC); Interpro domain(s) IPR010107 Glutamate decarboxylase                                                                                                   | -0.78 | 1.29E-03 | Glutamate decarboxylase                                                                   | GO:0003824; GO:0030170                                     |
| Solyc12g045030.1 | Short-chain dehydrogenase/reductase family protein (AHRD V1 D7LV30_ARALY); contains Interpro domain(s) IPR002347 Glucose/ribitol dehydrogenase                                                              | -0.78 | 1.26E-03 | Probable l-xylulose reductase                                                             | GO:0008152; GO:0016491                                     |
| Solyc02g082080.1 | High affinity copper uptake protein (AHRD **** Q8QH07_DANRE); contains Interpro domain(s) IPR007274 Ctr copper transporter                                                                                  | -0.77 | 8.61E-05 | Copper transporter 5                                                                      | GO:0005375; GO:0006825; GO:0016021                         |
| Solyc05g008290.2 | Bilirubin oxidase (AHRD V1 ***- C6PN69_9CLOT); Interpro domain(s) IPR008972 Cupredoxin                                                                                                                      | -0.77 | 1.34E-03 | Multicopper oxidase lpr1                                                                  | GO:0055114                                                 |
| Solyc09g090070.1 | Inorganic phosphate transporter (AHRD V1 **** contains Interpro domain(s) IPR004738 Phosphate permease                                                                                                      | -0.77 | 6.79E-05 | Phosphate transporter                                                                     | GO:0005315; GO:0016021                                     |
| Solyc12g015630.1 | Genomic DNA chromosome 5 P1 clone (AHRD V1 ***- Q9FM81_ARATH)                                                                                                                                               | -0.77 | 1.59E-03 | Unknown protein                                                                           |                                                            |
| Solyc01g094910.2 | Ferric reductase oxidase (AHRD V1 **-* contains Interpro domain(s) IPR013121 Ferric reductase, NAD binding                                                                                                  | -0.76 | 6.57E-05 | Ferric reduction oxidase 2                                                                | GO:0005506; GO:0009055; GO:0016021; GO:0016491; GO:0050660 |
| Solyc02g081850.2 | Amino acid transporter (AHRD V1 **** contains Interpro domain(s) IPR015606 Cationic amino acid transporter                                                                                                  | -0.76 | 6.84E-05 | Cationic amino acid transporter 5                                                         | GO:0006810; GO:0016020                                     |
| Solyc05g055310.2 | Copper chaperone (AHRD V1 **** Q84KJ2_SOLLC); Interpro domain(s) IPR006121 Heavy metal transport/detoxification protein                                                                                     | -0.76 | 9.21E-05 | Copper chaperone                                                                          | GO:0030001; GO:0046872                                     |
| Solyc06g060250.2 | Aldehyde dehydrogenase family protein expressed (AHRD **** Q53NG8_ORYSJ); contains Interpro domain(s) IPR012394 Aldehyde dehydrogenase NAD(P)-dependent IPR015590 Aldehyde dehydrogenase                    | -0.76 | 1.63E-04 | Aldehyde dehydrogenase family 3 member h1                                                 | GO:0008152; GO:0016491                                     |
| Solyc08g062210.2 | Nuclear transcription factor Y subunit A-3 V1 **** B6TQI5_MAIZE); contains Interpro domain(s) IPR001289 CCAAT-binding transcription factor, subunit B                                                       | -0.76 | 2.50E-04 | Nuclear transcription factor y subunit a-3                                                | GO:0003677; GO:0016602                                     |
| Solyc10g078590.1 | Unknown Protein (AHRD V1)                                                                                                                                                                                   | -0.76 | 7.17E-04 | Unknown protein                                                                           |                                                            |
| Solyc03g117810.2 | Phosphate import ATP-binding protein pstB 1 V1 **** B6UHM7_MAIZE); contains Interpro domain(s) IPR005670 Phosphate transport system permease protein 1                                                      | -0.75 | 3.87E-04 | Abc transporter i family member 17                                                        | GO:0005524; GO:0016887                                     |
| Solyc04g040210.2 | Unknown Protein (AHRD V1)                                                                                                                                                                                   | -0.75 | 2.07E-03 | Cysteine-rich and transmembrane domain-containing protein a                               |                                                            |
| Solyc08g067960.2 | CHY zinc finger family protein expressed V1 ***- Q337P2_ORYSJ); contains Interpro domain(s) IPR008913 Zinc finger, CHY-type                                                                                 | -0.75 | 9.96E-04 | Ring finger and chy zinc finger domain-containing protein 1                               | GO:0008270; GO:0005102                                     |
| Solyc08g082640.2 | Cellulose synthase (AHRD V1 **** B9IMB3_POPTR); Interpro domain(s) IPR005150 Cellulose synthase                                                                                                             | -0.75 | 8.05E-04 | Cellulose synthase-like protein g3                                                        | GO:0016020; GO:0016760; GO:0030244                         |
| Solyc11g011880.1 | RLK, Receptor like protein, putative resistance with an antifungal domain                                                                                                                                   | -0.75 | 1.09E-03 | Cysteine-rich receptor-like protein kinase 2                                              | GO:0004672; GO:0005524; GO:0006468                         |
| Solyc11g065820.1 | Mate efflux family protein (AHRD V1 D7KHQ9_ARALY); contains Interpro domain(s) IPR002528 Multi antimicrobial extrusion protein MatE                                                                         | -0.75 | 1.34E-03 | Mate efflux family protein 1                                                              | GO:0006855; GO:0015238; GO:0015297; GO:0016020             |
| Solyc05g008110.2 | Unknown Protein (AHRD V1)                                                                                                                                                                                   | -0.74 | 3.80E-04 | Unknown Protein                                                                           |                                                            |
| Solyc06g063090.2 | Alanine aminotransferase (AHRD V1 **** Q6VEJ5_CAPAN); Interpro domain(s) IPR004839 Aminotransferase, class I and II                                                                                         | -0.74 | 2.17E-04 | Alanine aminotransferase 2                                                                | GO:0003824; GO:0030170                                     |
| Solyc06g082590.1 | Ethylene responsive transcription factor 1b (AHRD *-*- C0J9I8_9ROSA); contains Interpro domain(s) IPR001471 Pathogenesis-related transcriptional factor and ERF, DNA-binding IPR017392 Pathogenesis-related | -0.74 | 1.30E-03 | Pathogenesis-related genes transcriptional activator pti6-                                | GO:0003700; GO:0006355                                     |
| Solyc09g075060.2 | Beta-glucosidase (AHRD V1 **** D7L7Z3_ARALY); contains domain(s) IPR001360 Glycoside hydrolase, family 1                                                                                                    | -0.74 | 4.98E-04 | Beta-glucosidase 11                                                                       | GO:0003824; GO:0005975; GO:0043169                         |
| Solyc10g007050.2 | Enolase-phosphatase E-1 (AHRD V1 *-*- A8UQN2_9AQUI); Interpro domain(s) IPR010041 2,3-diketo-5-methylthio-1-phosphopentane phosphatase                                                                      | -0.74 | 2.06E-04 | Probable bifunctional methylthioribulose-1-phosphate dehydratase enolase-phosphatase e1 1 | GO:0003824; GO:0008152                                     |
| Solyc02g091100.2 | Oxalyl-CoA decarboxylase (AHRD V1 **-- D5PWM9_COREQ); Interpro domain(s) IPR012001 Thiamine pyrophosphate enzyme, N-terminal TPP binding region                                                             | -0.73 | 2.16E-04 | 2-hydroxyacyl- lyase                                                                      | GO:0030976                                                 |

|                  |                                                                                                                                                                                                                                                       |       |          |                                                                                   |                                                |
|------------------|-------------------------------------------------------------------------------------------------------------------------------------------------------------------------------------------------------------------------------------------------------|-------|----------|-----------------------------------------------------------------------------------|------------------------------------------------|
| Solyc03g019880.2 | UPF0426 protein At1g28150, chloroplastic (AHRD V1 Y1815_ARATH)                                                                                                                                                                                        | -0.73 | 1.58E-04 | Upf0426 protein chloroplastic                                                     |                                                |
| Solyc03g118970.2 | Multidrug resistance protein mdtK (AHRD V1 MDTK_CITK8); contains Interpro domain(s) IPR015521 MATE family transporter related protein                                                                                                                 | -0.73 | 1.52E-04 | Mate efflux family protein 5                                                      | GO:0006855; GO:0015238; GO:0015297; GO:0016020 |
| Solyc04g007780.2 | Major latex-like protein (AHRD V1 ***- contains Interpro domain(s) IPR000916 Bet v I allergen                                                                                                                                                         | -0.73 | 6.81E-04 | Pr-10 type pathogenesis-related protein                                           | GO:0006952; GO:0009607                         |
| Solyc04g017690.2 | Early response to dehydration 15-like protein (AHRD V1 ***- Q5MEE1_PSEMZ); contains Interpro domain(s) IPR009818 Ataxin-2, C-terminal                                                                                                                 | -0.73 | 6.40E-04 | Protein early responsive to dehydration 15                                        | GO:0005515                                     |
| Solyc08g075370.2 | Unknown Protein (AHRD V1); contains Interpro IPR001464 Annexin                                                                                                                                                                                        | -0.73 | 6.55E-04 | Unknown Protein                                                                   | GO:0005509; GO:0005544                         |
| Solyc10g054670.1 | Unknown Protein (AHRD V1)                                                                                                                                                                                                                             | -0.73 | 2.61E-03 | Unknown Protein                                                                   |                                                |
| Solyc01g090900.2 | Unknown Protein (AHRD V1)                                                                                                                                                                                                                             | -0.72 | 4.14E-04 | Cytochrome p450                                                                   |                                                |
| Solyc03g095620.2 | ABC-1 domain protein (AHRD V1 **-- contains Interpro domain(s) IPR004147 ABC-1                                                                                                                                                                        | -0.72 | 9.40E-04 | Unknown Protein                                                                   |                                                |
| Solyc05g050110.2 | cDNA clone J013073A18 full insert sequence V1 *- B7EPF9_ORYSJ); contains Interpro domain(s) IPR018790 Protein of unknown function DUF2358                                                                                                             | -0.72 | 2.02E-03 | Unknown Protein                                                                   |                                                |
| Solyc11g013120.1 | Protein crcB homolog (AHRD V1 *- contains Interpro domain(s) IPR003691 Camphor resistance CrcB protein                                                                                                                                                | -0.72 | 2.75E-03 | Protein crcB homolog                                                              | GO:0016020                                     |
| Solyc12g014100.1 | Homogentisate 1 2-dioxygenase (AHRD V1 ***- contains Interpro domain(s) IPR005708 Homogentisate 1,2-dioxygenase                                                                                                                                       | -0.72 | 1.59E-03 | Homogentisate -dioxygenase                                                        | GO:0004411; GO:0006559; GO:0006570; GO:0055114 |
| Solyc02g071280.2 | Ribosome maturation factor rimM (AHRD V1 A4CTC3_SYNPV); contains Interpro domain(s) IPR011961 16S rRNA processing protein RimM                                                                                                                        | -0.71 | 8.53E-04 | 16s rrna processing protein                                                       | GO:0005840; GO:0006364; GO:0043022             |
| Solyc03g111800.2 | Receptor like kinase, RLK                                                                                                                                                                                                                             | -0.71 | 7.29E-04 | Leucine-rich repeat receptor-like serine threonine tyrosine-protein kinase sobir1 | GO:0005515; GO:0004675                         |
| Solyc04g076820.1 | Octicosapeptide/Phox/Bem1p domain-containing protein (AHRD V1 ***- contains Interpro domain(s) IPR000270 Octicosapeptide/Phox/Bem1p                                                                                                                   | -0.71 | 1.20E-03 | Xin actin-binding repeat-containing protein                                       |                                                |
| Solyc08g007790.2 | Hydroxymethylglutaryl-CoA synthase (AHRD V1 **** A9ZMZ7_HEVBR); Interpro domain(s) IPR010122 Hydroxymethylglutaryl-CoA synthase, eukaryotic IPR013746 Hydroxymethylglutaryl-coenzyme A synthase C-terminal IPR000590 Hydroxymethylglutaryl-coenzyme A | -0.71 | 6.22E-04 | Hydroxymethylglutaryl- synthase-like                                              | GO:0004421; GO:0008299                         |
| Solyc10g005370.2 | Pyruvate, phosphate dikinase regulatory protein 2 V1 ***- PDRP2_ARATH); contains Interpro domain(s) IPR005177 Protein of unknown function DUF299                                                                                                      | -0.71 | 1.45E-03 | Probable phosphate dikinase regulatory chloroplastic                              | GO:0016772; GO:0004672; GO:0004721             |
| Solyc01g008070.2 | Alpha/beta superfamily hydrolase (AHRD V1 ***- contains Interpro domain(s) IPR010765 Protein of unknown function DUF1350                                                                                                                              | -0.7  | 1.44E-03 | Unknown Protein                                                                   |                                                |
| Solyc03g116110.2 | Alpha/beta hydrolase fold protein (AHRD V1 B2J569_NOSP7)                                                                                                                                                                                              | -0.7  | 5.73E-04 | Alpha beta hydrolase family protein                                               |                                                |
| Solyc10g078600.1 | Myrosinase-binding protein (Fragment) (AHRD V1 ***- contains Interpro domain(s) IPR001229 Mannose-binding lectin                                                                                                                                      | -0.7  | 4.88E-04 | Mannose-binding lectin superfamily                                                |                                                |
| Solyc01g009430.2 | Os02g0448600 protein (Fragment) (AHRD V1 ***-)                                                                                                                                                                                                        | -0.69 | 8.33E-04 | Unknown Protein                                                                   |                                                |
| Solyc01g100660.2 | Transcription factor (AHRD V1 ***- D7L4N5_ARALY)                                                                                                                                                                                                      | -0.69 | 7.19E-04 | Transcription factor bhlh147                                                      |                                                |
| Solyc01g104720.2 | Unknown Protein (AHRD V1)                                                                                                                                                                                                                             | -0.69 | 3.41E-04 | Nodulin 21 -like transporter family                                               |                                                |
| Solyc01g105970.2 | Magnesium-dependent phosphatase-1 family protein expressed (AHRD **** Q84R45_ORYSJ); contains Interpro domain(s) IPR010036 Magnesium-dependent phosphatase-1                                                                                          | -0.69 | 1.04E-03 | Magnesium-dependent phosphatase 1                                                 | GO:0000287; GO:0016791                         |
| Solyc06g061090.2 | LOC555512 protein (Fragment) (AHRD V1 *-)                                                                                                                                                                                                             | -0.69 | 1.14E-03 | Tld protein                                                                       |                                                |
| Solyc11g069290.1 | Glutamine amidotransferase subunit pdxT (AHRD V1 B6SNW4_MAIZE); contains Interpro domain(s) IPR002161 SNO glutamine amidotransferase                                                                                                                  | -0.69 | 2.62E-04 | Pyridoxal biosynthesis protein pdx2                                               |                                                |
| Solyc01g086810.2 | Cc-nbs-lrr, resistance protein                                                                                                                                                                                                                        | -0.68 | 2.52E-04 | Disease resistance protein rpm1                                                   | GO:0006952                                     |
| Solyc01g102860.2 | Unknown Protein (AHRD V1)                                                                                                                                                                                                                             | -0.68 | 2.04E-03 | Unknown Protein                                                                   |                                                |
| Solyc01g112100.2 | Dimethylaniline monooxygenase 5 (AHRD V1 **** contains Interpro domain(s) IPR012143 Dimethylaniline monooxygenase, N-oxide-forming                                                                                                                    | -0.68 | 6.30E-04 | Probable flavin-containing monooxygenase 1                                        | GO:0004499; GO:0031227; GO:0050660; GO:0050661 |

|                  |                                                                                                                                                                                    |       |          |                                                           |                                    |
|------------------|------------------------------------------------------------------------------------------------------------------------------------------------------------------------------------|-------|----------|-----------------------------------------------------------|------------------------------------|
| Solyc02g083970.1 | Chromosome 18 contig 1 DNA sequence V1 *- Q00SS6_OSTTA)                                                                                                                            | -0.68 | 5.11E-04 | Unknown Protein                                           |                                    |
| Solyc03g121270.2 | IAA-amino acid hydrolase (AHRD V1 **** contains Interpro domain(s) IPR017439 Peptidase M20D, mername-AA028/carboxypeptidase Ss1                                                    | -0.68 | 4.34E-04 | laa-amino acid hydrolase ilr1                             | GO:0016787; GO:0010179             |
| Solyc06g030490.2 | Serine/threonine-protein phosphatase (AHRD V1 **** D7LDT2_ARALY); Interpro domain(s) IPR006186 Serine/threonine-specific protein phosphatase and bis(5-nucleosyl)-tetraphosphatase | -0.68 | 1.79E-03 | Serine threonine-protein phosphatase pp1 isozyme 4        | GO:0016787                         |
| Solyc07g007270.2 | Unknown Protein (AHRD V1)                                                                                                                                                          | -0.68 | 1.22E-03 | Unknown Protein                                           |                                    |
| Solyc07g065380.2 | Zinc transporter 2 (AHRD V1 **** contains Interpro domain(s) IPR003689 Zinc/iron permease                                                                                          | -0.68 | 1.35E-03 | Zinc transporter 11                                       | GO:0016020; GO:0030001; GO:0046873 |
| Solyc01g087030.2 | Makorin RING finger protein (AHRD V1 Q7X7W8_PEA); contains Interpro domain(s) IPR000571 Zinc finger, CCCH-type                                                                     | -0.67 | 2.21E-03 | Zinc finger ccch domain-containing protein 69             | GO:0005515; GO:0003682; GO:0008270 |
| Solyc02g087060.2 | Nodulin MtN21 family protein (AHRD V1 D7LPP0_ARALY)                                                                                                                                | -0.67 | 9.64E-04 | Wat1-related protein                                      |                                    |
| Solyc03g031920.2 | Yellow stripe-like protein 2.1 (Fragment) (AHRD ***- B4ZYE4_BRAJU); contains Interpro domain(s) IPR004813 Oligopeptide transporter OPT superfamily                                 | -0.67 | 1.01E-03 | Probable metal-nicotianamine transporter ysl7             | GO:0015198; GO:0055085             |
| Solyc04g048900.2 | Calreticulin 2 calcium-binding protein (AHRD V1 A8HMC0_CHLRE); contains Interpro domain(s) IPR009169 Calreticulin                                                                  | -0.67 | 1.63E-03 | Calreticulin-3-like isoform                               | GO:0005509                         |
| Solyc04g080810.2 | Ubiquitin-conjugating enzyme E2 W (AHRD V1 B6SI81_MAIZE); contains Interpro domain(s) IPR000608 Ubiquitin-conjugating enzyme, E2                                                   | -0.67 | 1.14E-03 | Probable ubiquitin-conjugating enzyme e2 18               | GO:0019787; GO:0043687; GO:0051246 |
| Solyc07g043310.2 | Aminotransferase (AHRD V1 ***- D2KZ08_WHEAT); contains domain(s) IPR005814 Aminotransferase class-III                                                                              | -0.67 | 4.93E-04 | Gamma aminobutyrate transaminase mitochondrial            | GO:0003824; GO:0030170             |
| Solyc09g082120.2 | Glyoxalase/bleomycin resistance protein/dioxygenase (AHRD V1 ***- contains Interpro domain(s) IPR004360 Glyoxalase/bleomycin resistance protein/dioxygenase                        | -0.67 | 1.31E-03 | Lactoylglutathione lyase                                  | GO:0004462                         |
| Solyc01g102660.2 | Maleylacetoacetate isomerase / glutathione S-transferase (AHRD ***- Q6MR10_BDEBA); contains Interpro domain(s) IPR005955 Maleylacetoacetate isomerase                              | -0.66 | 7.97E-04 | Glutathione s-transferase zeta class                      | GO:0005737                         |
| Solyc01g104060.2 | Aminomethyltransferase (AHRD V1 ***- B0JMM8_MICAN); contains domain(s) IPR006222 Glycine cleavage T-protein, N-terminal                                                            | -0.66 | 1.02E-03 | Aminomethyltransferase                                    | GO:0004047; GO:0005737; GO:0006546 |
| Solyc02g084740.2 | Cytochrome P450                                                                                                                                                                    | -0.66 | 1.34E-03 | 3-epi-6-deoxocathasterone 23-monooxygenase                |                                    |
| Solyc03g112200.1 | Unknown Protein (AHRD V1)                                                                                                                                                          | -0.66 | 2.42E-03 | Hypothetical protein POPTR                                |                                    |
| Solyc05g009780.2 | Methionine aminopeptidase (AHRD V1 ***- B9SEJ2_RICCO); Interpro domain(s) IPR002467 Peptidase M24A, methionine aminopeptidase, subfamily 1                                         | -0.66 | 1.16E-03 | Methionine aminopeptidase chloroplastic                   | GO:0004177; GO:0006508; GO:0008235 |
| Solyc09g082060.2 | Cysteine synthase (AHRD V1 **** Q3LAG5_TOBAC); Interpro domain(s) IPR005859 Cysteine synthase A                                                                                    | -0.66 | 2.24E-03 | Cysteine synthase                                         | GO:0004124; GO:0006535             |
| Solyc09g082730.2 | Aldo/keto reductase family protein (AHRD V1 D7KWQ6_ARALY); contains Interpro domain(s) IPR001395 Aldo/keto reductase                                                               | -0.66 | 5.29E-04 | Perakine reductase                                        | GO:0016491; GO:0055114             |
| Solyc09g083020.1 | Myrosinase-binding protein-like protein (AHRD V1 **-* contains Interpro domain(s) IPR001229 Mannose-binding lectin                                                                 | -0.66 | 8.25E-04 | Inactive protein restricted tev movement 1                | GO:0005529                         |
| Solyc09g090980.2 | Major allergen Mal d 1 (AHRD ***- Q84LA7_MALDO); contains Interpro domain(s) IPR000916 Bet v I allergen                                                                            | -0.66 | 1.33E-03 | Pathogenesis-related protein sth-2                        | GO:0006952; GO:0009607             |
| Solyc01g009020.2 | Cysteine proteinase inhibitor (AHRD V1 **** contains Interpro domain(s) IPR000010 Proteinase inhibitor I25, cystatin                                                               | -0.65 | 1.32E-03 | Cysteine proteinase inhibitor                             | GO:0004869                         |
| Solyc01g087640.2 | Cinnamoyl CoA reductase-like protein (AHRD V1 A9PFK4_POPTR); contains Interpro domain(s) IPR016040 NAD(P)-binding domain                                                           | -0.65 | 5.22E-04 | Cinnamoyl- reductase 1                                    | GO:0003824; GO:0005488; GO:0008152 |
| Solyc01g105420.2 | Phospho-2-dehydro-3-deoxyheptonate aldolase 2 (AHRD V1 ***- contains Interpro domain(s) IPR002480 DAHP synthetase, class II                                                        | -0.65 | 1.37E-03 | Phospho-2-dehydro-3-deoxyheptonate aldolase chloroplastic | GO:0003849; GO:0009073             |
| Solyc02g089930.2 | Homeobox protein LIM-3 (Fragment) (AHRD V1 O42286_DANRE); contains Interpro domain(s) IPR001781 Zinc finger, LIM-type                                                              | -0.65 | 1.39E-03 | Protein da1-related 1                                     | GO:0008270                         |
| Solyc03g123610.2 | Alanine aminotransferase (AHRD V1 ***- Q6VEJ5_CAPAN); Interpro domain(s) IPR004839 Aminotransferase, class I and II                                                                | -0.65 | 5.49E-04 | Alanine aminotransferase 2                                | GO:0003824; GO:0030170             |
| Solyc05g006850.2 | Thioredoxin H (AHRD V1 ***- Q4U0W0_NICAL); Interpro domain(s) IPR015467 Thioredoxin, core                                                                                          | -0.65 | 6.94E-04 | Thioredoxin h2                                            | GO:0045454                         |

|                  |                                                                                                                                                                          |       |          |                                                              |                                                |
|------------------|--------------------------------------------------------------------------------------------------------------------------------------------------------------------------|-------|----------|--------------------------------------------------------------|------------------------------------------------|
| Solyc07g042190.2 | Os10g0422600 protein (Fragment) (AHRD V1 *-*- contains Interpro domain(s) IPR007650 Protein of unknown function DUF581                                                   | -0.65 | 2.59E-03 | Duf581 family protein                                        |                                                |
| Solyc12g042770.1 | Chloroplast post-illumination chlorophyll fluorescence increase protein V1 **-- A1Y9I8_TOBAC)                                                                            | -0.65 | 1.56E-03 | Post-illumination chlorophyll fluorescence increase          |                                                |
| Solyc02g068240.2 | Diacylglycerol acyltransferase family (AHRD V1 **** contains Interpro domain(s) IPR007130 Diacylglycerol acyltransferase                                                 | -0.64 | 2.45E-03 | Diacylglycerol o-acyltransferase 2                           | GO:0016747                                     |
| Solyc04g080010.2 | UDP-glucosyltransferase (AHRD V1 **** B8QI32_9MAGN); contains domain(s) IPR002213 UDP-glucuronosyl/UDP-glucosyltransferase                                               | -0.64 | 1.62E-03 | Hydroquinone glucosyltransferase                             | GO:0008152; GO:0016758                         |
| Solyc05g052260.2 | Appr-1-p processing domain protein (AHRD V1 B8FDL2_DESAA); contains Interpro domain(s) IPR002589 Appr-1-p processing                                                     | -0.64 | 2.27E-03 | O-acetyl-adp-ribose deacetylase macrod2                      |                                                |
| Solyc09g091840.2 | Glutathione-disulfide reductase (AHRD V1 **** Q1D9Y5_MYXXD); Interpro domain(s) IPR006324 Glutathione reductase, plant                                                   | -0.64 | 1.14E-03 | Glutathione chloroplastic                                    | GO:0005737; GO:0016491; GO:0045454; GO:0050660 |
| Solyc02g085310.2 | Unknown Protein (AHRD V1)                                                                                                                                                | -0.63 | 2.74E-03 | Unknown Protein                                              |                                                |
| Solyc07g006140.2 | Cytochrome P450                                                                                                                                                          | -0.63 | 2.32E-03 | Cytochrome p450 cyp72a219                                    | GO:0004497; GO:0005506; GO:0020037             |
| Solyc07g042550.2 | Sucrose synthase (AHRD V1 **** O82691_SOLLC); Interpro domain(s) IPR012820 Sucrose synthase, plants and cyanobacteria IPR000368 Sucrose synthase                         | -0.63 | 1.97E-03 | Sucrose synthase                                             | GO:0009058                                     |
| Solyc07g045190.1 | RING-H2 finger protein (AHRD V1 ***- contains Interpro domain(s) IPR018957 Zinc finger, C3HC4 RING-type                                                                  | -0.63 | 2.22E-03 | Probable e3 ubiquitin-protein ligase xerico                  | GO:0005515; GO:0008270                         |
| Solyc07g063010.2 | Fatty acid oxidation complex subunit alpha V1 **-- FADB_ACIBC); contains Interpro domain(s) IPR006176 3-hydroxyacyl-CoA dehydrogenase, NAD binding                       | -0.63 | 1.74E-03 | Probable 3-hydroxyacyl-dehydrogenase                         | GO:0006631; GO:0016491                         |
| Solyc01g100920.2 | Nodulin-like protein (AHRD V1 ***- Q84TV1_GOSHI); Interpro domain(s) IPR000620 Protein of unknown function DUF6, transmembrane                                           | -0.62 | 1.60E-03 | Wat1-related protein                                         | GO:0016020                                     |
| Solyc04g076040.2 | Cyclin d2 (AHRD V1 **** Q6T2Z7_SOYBN); Interpro domain(s) IPR015451 Cyclin D                                                                                             | -0.62 | 2.08E-03 | D2 4-type cyclin                                             | GO:0005634; GO:0005515; GO:0016538             |
| Solyc07g063570.2 | Cytochrome c biogenesis protein family (AHRD ***- D7MU78_ARALY); contains Interpro domain(s) IPR003834 Cytochrome c assembly protein, transmembrane region               | -0.62 | 1.20E-03 | Cytochrome c-type biogenesis ccda-like chloroplastic protein | GO:0016020; GO:0017004                         |
| Solyc01g099100.2 | Long-chain-fatty-acid coa ligase (AHRD V1 ***- contains Interpro domain(s) IPR000873 AMP-dependent synthetase and ligase                                                 | -0.61 | 2.16E-03 | Long chain acyl- synthetase peroxisomal                      | GO:0003824; GO:0008152                         |
| Solyc02g085640.2 | Xaa-Pro aminopeptidase 1 (AHRD V1 ***- contains Interpro domain(s) IPR001131 Peptidase M24B, X-Pro dipeptidase/aminopeptidase P, conserved site IPR000994 Peptidase M24, | -0.61 | 1.30E-03 | Probable xaa-pro aminopeptidase p                            | GO:0016787                                     |
| Solyc03g114950.2 | Lipid a export ATP-binding/permease protein msba V1 ***- Q17P67_AEDAE); contains Interpro domain(s) IPR001140 ABC transporter, transmembrane region                      | -0.61 | 1.68E-03 | Abc transporter b family member 25                           | GO:0005524; GO:0016887                         |
| Solyc04g074750.2 | Polyadenylate-binding protein 1-A (AHRD V1 **-* contains Interpro domain(s) IPR000504 RNA recognition motif, RNP-1                                                       | -0.61 | 1.64E-03 | 28 kda chloroplastic                                         | GO:0000166                                     |
| Solyc06g060790.1 | 3-isopropylmalate dehydratase small subunit (AHRD V1 Q9ZW85_ARATH); contains Interpro domain(s) IPR011827 3-isopropylmalate dehydratase, small subunit, subgroup         | -0.61 | 2.50E-03 | 3-isopropylmalate dehydratase small subunit 3                | GO:0008152                                     |
| Solyc08g075860.2 | Os06g0115800 protein (Fragment) (AHRD V1 *-*-                                                                                                                            | -0.61 | 2.74E-03 | Unknown Protein                                              |                                                |
| Solyc08g077780.2 | Serine/threonine protein kinase (AHRD V1 **** contains Interpro domain(s) IPR015740 Plant protein serine/threonine kinase-like                                           | -0.61 | 2.47E-03 | Serine threonine-protein kinase sapk3-                       | GO:0004674; GO:0005524; GO:0006468; GO:0006970 |
| Solyc09g065300.2 | Uncharacterized membrane protein (AHRD V1 *-*-                                                                                                                           | -0.61 | 2.54E-03 | Unknown Protein                                              |                                                |
| Solyc04g011520.2 | Serine/threonine kinase-like protein ABC1063 (AHRD V1 Q1KMP8_HORVD); contains Interpro domain(s) IPR002290 Serine/threonine protein kinase                               | -0.6  | 2.78E-03 | Protein kinase chloroplastic                                 | GO:0004672; GO:0005524; GO:0006468             |
| Solyc10g006270.2 | Autophagy-related protein 8 (AHRD V1 ***- contains Interpro domain(s) IPR004241 Light chain 3 (LC3)                                                                      | -0.6  | 1.81E-03 | Autophagy-related protein 8c                                 | GO:0048487                                     |
| Solyc10g045240.1 | Beta-glucosidase D4 (AHRD V1 ***- B2ZUU0_LOTJA); Interpro domain(s) IPR001360 Glycoside hydrolase, family 1                                                              | -0.6  | 1.58E-03 | Vicianin hydrolase-                                          | GO:0003824; GO:0005975; GO:0043169             |
| Solyc04g005650.1 | Mitochondrial carrier family (AHRD V1 ***- contains Interpro domain(s) IPR001993 Mitochondrial substrate carrier                                                         | -0.59 | 2.26E-03 | Peroxisomal nicotinamide adenine dinucleotide carrier        | GO:0005515; GO:0016020; GO:0051724             |
| Solyc08g029160.1 | Membrane-associated progesterone receptor component 2 (AHRD **-- B6K303_SCHJY); contains Interpro domain(s) IPR001199 Cytochrome b5                                      | -0.59 | 1.63E-03 | Probable steroid-binding protein 3                           | GO:0020037                                     |

|                  |                                                                                                                                                               |       |          |                                                   |                                                   |
|------------------|---------------------------------------------------------------------------------------------------------------------------------------------------------------|-------|----------|---------------------------------------------------|---------------------------------------------------|
| Solyc09g005620.2 | Glutaredoxin (AHRD V1 *-*- D7G070_ECTSI); contains domain(s) IPR004480<br>Glutaredoxin-related protein                                                        | -0.59 | 2.34E-03 | Monothiol glutaredoxin-<br>chloroplasic           | GO:0045454                                        |
| Solyc09g059040.2 | Alcohol dehydrogenase zinc-containing (AHRD V1 *-*- contains Interpro domain(s)<br>IPR002085 Alcohol dehydrogenase superfamily, zinc-containing               | -0.59 | 2.09E-03 | Quinone-oxidoreductase<br>chloroplasic            | GO:0008270; GO:0016491                            |
| Solyc11g007590.1 | OTU domain-containing protein 4 (AHRD V1 OTUD4_HUMAN); contains Interpro<br>domain(s) IPR003323 Ovarian tumour, otubain                                       | -0.59 | 2.41E-03 | Otu domain-containing protein                     |                                                   |
| Solyc12g100200.1 | Protein YdiU (AHRD V1 ***- B5N5F2_SALET); Interpro domain(s) IPR003846<br>Uncharacterised protein family UPF0061                                              | -0.59 | 2.47E-03 | Selenoprotein o-                                  |                                                   |
| Solyc06g082010.2 | Zinc finger CCCH domain-containing protein 66 V1 ***- C3H66_ARATH); contains<br>Interpro domain(s) IPR002110 Ankyrin                                          | -0.58 | 2.68E-03 | Zinc finger ccch domain-<br>containing protein 66 | GO:0003700; GO:0008270                            |
| Solyc10g084400.1 | Glutathione S-transferase (AHRD V1 ***- Q76KW1_PEA); Interpro domain(s)<br>IPR017933 Glutathione S-transferase/chloride channel, C-terminal                   | -0.58 | 2.63E-03 | Glutathione s-transferase I3                      |                                                   |
| Solyc12g096120.1 | Ubiquitin-fold modifier 1 (AHRD V1 ***- contains Interpro domain(s) IPR005375<br>Ubiquitin-like, Ufm1                                                         | -0.58 | 1.62E-03 | Ubiquitin-fold modifier 1                         |                                                   |
| Solyc02g063490.2 | Malate dehydrogenase (AHRD V1 **** B9S7S1_RICCO); Interpro domain(s)<br>IPR010097 Malate dehydrogenase, NAD-dependent, eukaryotes and gamma<br>proteobacteria | -0.57 | 2.88E-03 | Malate glyoxysomal                                | GO:0003824; GO:0005975                            |
| Solyc06g060260.2 | Stromal ascorbate peroxidase 7                                                                                                                                | -0.57 | 2.41E-03 | Probable l-ascorbate peroxidase<br>chloroplasic   | GO:0004601; GO:0006979;<br>GO:0020037; GO:0055114 |
| Solyc10g054820.1 | Aquaporin (AHRD V1 ***- Q40266_MESCR); contains domain(s) IPR000425 Major<br>intrinsic protein                                                                | -0.57 | 2.46E-03 | X intrinsic protein                               | GO:0005215; GO:0006810;<br>GO:0016020             |

**Supplementary Table 5:** Gene Set Enrichment Analysis of up-regulated genes based on the "Molecular Function" ontological domain.

| GO term    | Description                                                     | Number in input list | Number in BG/Ref | p-value  | FDR      |
|------------|-----------------------------------------------------------------|----------------------|------------------|----------|----------|
| GO:0004674 | protein serine/threonine kinase activity                        | 39                   | 625              | 1.40E-09 | 5.40E-07 |
| GO:0004702 | receptor signaling protein serine/threonine kinase activity     | 23                   | 286              | 5.90E-08 | 7.70E-06 |
| GO:0004672 | protein kinase activity                                         | 41                   | 772              | 4.00E-08 | 7.70E-06 |
| GO:0005057 | receptor signaling protein activity                             | 23                   | 292              | 8.30E-08 | 8.20E-06 |
| GO:0004675 | transmembrane receptor protein serine/threonine kinase activity | 21                   | 252              | 1.30E-07 | 1.00E-05 |
| GO:0016773 | phosphotransferase activity, alcohol group as acceptor          | 42                   | 848              | 1.70E-07 | 1.10E-05 |
| GO:0003824 | catalytic activity                                              | 170                  | 6061             | 3.40E-07 | 1.90E-05 |
| GO:0016740 | transferase activity                                            | 78                   | 2180             | 5.40E-07 | 2.60E-05 |
| GO:0016301 | kinase activity                                                 | 44                   | 991              | 1.50E-06 | 6.40E-05 |
| GO:0016772 | transferase activity, transferring phosphorus-containing groups | 47                   | 1098             | 1.60E-06 | 6.40E-05 |
| GO:0019199 | transmembrane receptor protein kinase activity                  | 22                   | 333              | 2.50E-06 | 9.00E-05 |
| GO:0060089 | molecular transducer activity                                   | 27                   | 477              | 3.00E-06 | 9.10E-05 |
| GO:0004871 | signal transducer activity                                      | 27                   | 477              | 3.00E-06 | 9.10E-05 |
| GO:0004888 | transmembrane receptor activity                                 | 22                   | 367              | 1.10E-05 | 3.00E-04 |
| GO:0004872 | receptor activity                                               | 23                   | 417              | 2.40E-05 | 6.30E-04 |
| GO:0070008 | serine-type exopeptidase activity                               | 5                    | 31               | 0.00067  | 0.015    |
| GO:0004185 | serine-type carboxypeptidase activity                           | 5                    | 31               | 0.00067  | 0.015    |
| GO:0004180 | carboxypeptidase activity                                       | 5                    | 32               | 0.00076  | 0.016    |
| GO:0004003 | ATP-dependent DNA helicase activity                             | 5                    | 35               | 0.0011   | 0.022    |
| GO:0003677 | DNA binding                                                     | 46                   | 1425             | 0.0013   | 0.026    |
| GO:0004091 | carboxylesterase activity                                       | 15                   | 299              | 0.0015   | 0.027    |
| GO:0003678 | DNA helicase activity                                           | 5                    | 38               | 0.0015   | 0.027    |
| GO:0008094 | DNA-dependent ATPase activity                                   | 5                    | 41               | 0.0021   | 0.035    |
| GO:0008238 | exopeptidase activity                                           | 5                    | 44               | 0.0027   | 0.045    |

**Supplementary Table 6.** Gene Set Enrichment Analysis of down-regulated genes based on the "Molecular Function" ontological domain.

| GO term    | Description                                        | Number in input list | Number in BG/Ref | p-value  | FDR      |
|------------|----------------------------------------------------|----------------------|------------------|----------|----------|
| GO:0005215 | transporter activity                               | 45                   | 989              | 4.10E-06 | 1.90E-03 |
| GO:0016491 | oxidoreductase activity                            | 42                   | 960              | 2.10E-05 | 4.90E-03 |
| GO:0022892 | substrate-specific transporter activity            | 35                   | 786              | 7.60E-05 | 0.012    |
| GO:0019825 | oxygen binding                                     | 15                   | 222              | 1.70E-04 | 0.019    |
| GO:0019199 | transmembrane receptor protein kinase activity     | 19                   | 333              | 2.00E-04 | 0.019    |
| GO:0015198 | oligopeptide transporter activity                  | 8                    | 78               | 4.80E-04 | 0.028    |
| GO:0015197 | peptide transporter activity                       | 8                    | 78               | 4.80E-04 | 0.028    |
| GO:0015103 | inorganic anion transmembrane transporter activity | 8                    | 78               | 4.80E-04 | 0.028    |
| GO:0008509 | anion transmembrane transporter activity           | 10                   | 127              | 6.90E-04 | 0.029    |
| GO:0015114 | phosphate transmembrane transporter activity       | 5                    | 28               | 6.10E-04 | 0.029    |
| GO:0004888 | transmembrane receptor activity                    | 19                   | 367              | 6.40E-04 | 0.029    |
| GO:0035251 | UDP-glucosyltransferase activity                   | 9                    | 113              | 0.001    | 0.046    |
| GO:0003824 | catalytic activity                                 | 161                  | 6061             | 0.001    | 0.048    |
| GO:0022857 | transmembrane transporter activity                 | 31                   | 786              | 0.001    | 0.048    |

**Supplementary Table 7.** KEGG analysis of the differentially expressed genes.

Mapping of enzymatic activities (Enzyme and Enzyme ID) of the DEGs (Sequence ID) in the KEGG pathways (Pathway).

| Pathway                                     | Seqs in Pathway | Enzyme                                                  | Enzyme ID   | Seqs of Enzyme | Sequence ID                                                                                                                                                 |
|---------------------------------------------|-----------------|---------------------------------------------------------|-------------|----------------|-------------------------------------------------------------------------------------------------------------------------------------------------------------|
| Starch and sucrose metabolism               | 17              | synthase (UDP-forming)                                  | ec:2.4.1.12 | 4              | Solyc02g072240.2 Solyc02g072240.2.1,<br>Solyc09g072820.2 Solyc09g072820.2.1,<br>Solyc07g005840.2 Solyc07g005840.2.1,<br>Solyc08g082640.2 Solyc08g082640.2.1 |
| Starch and sucrose metabolism               | 17              | synthase                                                | ec:2.4.1.13 | 3              | Solyc03g098290.2 Solyc03g098290.2.1,<br>Solyc07g042520.2 Solyc07g042520.2.1,<br>Solyc07g042550.2 Solyc07g042550.2.1                                         |
| Starch and sucrose metabolism               | 17              | synthase (GDP-forming)                                  | ec:2.4.1.29 | 1              | Solyc07g005840.2 Solyc07g005840.2.1                                                                                                                         |
| Starch and sucrose metabolism               | 17              | synthase                                                | ec:2.4.1.34 | 1              | Solyc01g006370.2 Solyc01g006370.2.1                                                                                                                         |
| Starch and sucrose metabolism               | 17              | 4-alpha-galacturonosyltransferase                       | ec:2.4.1.43 | 1              | Solyc05g009820.2 Solyc05g009820.2.1                                                                                                                         |
| Starch and sucrose metabolism               | 17              | pectin demethoxylase                                    | ec:3.1.1.11 | 3              | Solyc03g123620.2 Solyc03g123620.2.1,<br>Solyc12g008530.1 Solyc12g008530.1.1,<br>Solyc12g099190.1 Solyc12g099190.1.1                                         |
| Starch and sucrose metabolism               | 17              | pectin depolymerase                                     | ec:3.2.1.15 | 2              | Solyc05g005170.2 Solyc05g005170.2.1,<br>Solyc04g008230.2 Solyc04g008230.2.1                                                                                 |
| Starch and sucrose metabolism               | 17              | endo-1,3-beta-D-glucosidase                             | ec:3.2.1.39 | 2              | Solyc01g008620.2 Solyc01g008620.2.1,<br>Solyc02g086700.2 Solyc02g086700.2.1                                                                                 |
| Starch and sucrose metabolism               | 17              | endo-1,4-beta-D-glucanase                               | ec:3.2.1.4  | 1              | Solyc08g083210.2 Solyc08g083210.2.1                                                                                                                         |
| Biosynthesis of antibiotics                 | 16              | reductase (NADPH)                                       | ec:1.1.1.34 | 1              | Solyc02g082260.2 Solyc02g082260.2.1                                                                                                                         |
| Biosynthesis of antibiotics                 | 16              | dehydrogenase                                           | ec:1.1.1.35 | 1              | Solyc07g063010.2 Solyc07g063010.2.1                                                                                                                         |
| Biosynthesis of antibiotics                 | 16              | dehydrogenase                                           | ec:1.1.1.37 | 1              | Solyc02g063490.2 Solyc02g063490.2.1                                                                                                                         |
| Biosynthesis of antibiotics                 | 16              | equilase                                                | ec:1.11.1.6 | 1              | Solyc12g094620.1 Solyc12g094620.1.1                                                                                                                         |
| Biosynthesis of antibiotics                 | 16              | dehydrogenase (NAD <sup>+</sup> )                       | ec:1.2.1.3  | 1              | Solyc03g114150.2 Solyc03g114150.2.1                                                                                                                         |
| Biosynthesis of antibiotics                 | 16              | dehydrogenase                                           | ec:1.2.1.41 | 2              | Solyc12g044630.1 Solyc12g044630.1.1,<br>Solyc06g019170.2 Solyc06g019170.2.1                                                                                 |
| Biosynthesis of antibiotics                 | 16              | dehydrogenase (NADP <sup>+</sup> , L-glutamate-forming) | ec:1.5.1.10 | 1              | Solyc07g017610.2 Solyc07g017610.2.1                                                                                                                         |
| Biosynthesis of antibiotics                 | 16              | dehydrogenase (NADP <sup>+</sup> , L-lysine-forming)    | ec:1.5.1.8  | 1              | Solyc07g017610.2 Solyc07g017610.2.1                                                                                                                         |
| Biosynthesis of antibiotics                 | 16              | (Si)-synthase                                           | ec:2.3.3.1  | 1              | Solyc07g055840.2 Solyc07g055840.2.1                                                                                                                         |
| Biosynthesis of antibiotics                 | 16              | synthase                                                | ec:2.3.3.10 | 1              | Solyc08g007790.2 Solyc08g007790.2.1                                                                                                                         |
| Biosynthesis of antibiotics                 | 16              | synthase                                                | ec:2.5.1.47 | 2              | Solyc01g094790.2 Solyc01g094790.2.1,<br>Solyc09g082060.2 Solyc09g082060.2.1                                                                                 |
| Biosynthesis of antibiotics                 | 16              | synthase                                                | ec:2.5.1.54 | 1              | Solyc01g105420.2 Solyc01g105420.2.1                                                                                                                         |
| Biosynthesis of antibiotics                 | 16              | 5-kinase                                                | ec:2.7.2.11 | 2              | Solyc12g044630.1 Solyc12g044630.1.1,<br>Solyc06g019170.2 Solyc06g019170.2.1                                                                                 |
| Biosynthesis of antibiotics                 | 16              | 2,3-dihydro-2,3-dihydroxybenzoate synthase              | ec:3.3.2.1  | 1              | Solyc01g007920.2 Solyc01g007920.2.1                                                                                                                         |
| Biosynthesis of antibiotics                 | 16              | carboxylase                                             | ec:4.1.1.39 | 1              | Solyc02g085940.2 Solyc02g085940.2.1                                                                                                                         |
| Biosynthesis of antibiotics                 | 16              | synthase                                                | ec:5.5.1.4  | 1              | Solyc05g051850.2 Solyc05g051850.2.1                                                                                                                         |
| Amino sugar and nucleotide sugar metabolism | 8               | 4-alpha-galacturonosyltransferase                       | ec:2.4.1.43 | 1              | Solyc05g009820.2 Solyc05g009820.2.1                                                                                                                         |



|                                             |   |                         |              |   |                                                                                                                                                                                                                                                                                     |
|---------------------------------------------|---|-------------------------|--------------|---|-------------------------------------------------------------------------------------------------------------------------------------------------------------------------------------------------------------------------------------------------------------------------------------|
| Amino sugar and nucleotide sugar metabolism | 8 | chitodextrinase         | ec:3.2.1.14  | 7 | Solyc02g082920.2 Solyc02g082920.2.1,<br>Solyc02g061770.2 Solyc02g061770.2.1,<br>Solyc07g005100.2 Solyc07g005100.2.1,<br>Solyc05g050130.2 Solyc05g050130.2.1,<br>Solyc10g055820.1 Solyc10g055820.1.1,<br>Solyc10g055800.1 Solyc10g055800.1.1,<br>Solyc10g055810.1 Solyc10g055810.1.1 |
| Glutathione metabolism                      | 7 | peroxidase              | ec:1.11.1.11 | 2 | Solyc06g060260.2 Solyc06g060260.2.1,<br>Solyc09g007270.2 Solyc09g007270.2.1                                                                                                                                                                                                         |
| Phenylpropanoid biosynthesis                | 7 | lactoperoxidase         | ec:1.11.1.7  | 6 | Solyc07g056460.2 Solyc07g056460.2.1,<br>Solyc01g006300.2 Solyc01g006300.2.1,<br>Solyc01g006290.2 Solyc01g006290.2.1,<br>Solyc02g083480.2 Solyc02g083480.2.1,<br>Solyc04g071900.2 Solyc04g071900.2.1,<br>Solyc05g052280.2 Solyc05g052280.2.1,<br>Solyc09g091840.2 Solyc09g091840.2.1 |
| Glutathione metabolism                      | 7 | reductase               | ec:1.8.1.7   | 1 | Solyc09g091840.2 Solyc09g091840.2.1                                                                                                                                                                                                                                                 |
| Phenylpropanoid biosynthesis                | 7 | glucosyltransferase     | ec:2.4.1.128 | 1 | Solyc01g107820.2 Solyc01g107820.2.1                                                                                                                                                                                                                                                 |
| Glutathione metabolism                      | 7 | transferase             | ec:2.5.1.18  | 4 | Solyc07g056460.2 Solyc07g056460.2.1,<br>Solyc01g102660.2 Solyc01g102660.2.1,<br>Solyc09g011590.2 Solyc09g011590.2.1,<br>Solyc09g011580.2 Solyc09g011580.2.1,<br>Solyc02g063490.2 Solyc02g063490.2.1                                                                                 |
| Cysteine and methionine metabolism          | 6 | dehydrogenase           | ec:1.1.1.37  | 1 | Solyc02g063490.2 Solyc02g063490.2.1                                                                                                                                                                                                                                                 |
| Glyoxylate and dicarboxylate metabolism     | 6 | dehydrogenase           | ec:1.1.1.37  | 1 | Solyc02g063490.2 Solyc02g063490.2.1                                                                                                                                                                                                                                                 |
| Glyoxylate and dicarboxylate metabolism     | 6 | equilase                | ec:1.11.1.6  | 1 | Solyc12g094620.1 Solyc12g094620.1.1                                                                                                                                                                                                                                                 |
| Drug metabolism - cytochrome P450           | 6 | monooxygenase           | ec:1.14.13.8 | 1 | Solyc01g112100.2 Solyc01g112100.2.1                                                                                                                                                                                                                                                 |
| Cysteine and methionine metabolism          | 6 | oxidase                 | ec:1.14.17.4 | 2 | Solyc07g049550.2 Solyc07g049550.2.1,<br>Solyc07g049530.2 Solyc07g049530.2.1                                                                                                                                                                                                         |
| Glyoxylate and dicarboxylate metabolism     | 6 | dehydrogenase           | ec:1.2.1.2   | 1 | Solyc02g086880.2 Solyc02g086880.2.1                                                                                                                                                                                                                                                 |
| beta-Alanine metabolism                     | 6 | dehydrogenase (NAD+)    | ec:1.2.1.3   | 1 | Solyc03g114150.2 Solyc03g114150.2.1                                                                                                                                                                                                                                                 |
| Pentose and glucuronate interconversions    | 6 | dehydrogenase (NAD+)    | ec:1.2.1.3   | 1 | Solyc03g114150.2 Solyc03g114150.2.1                                                                                                                                                                                                                                                 |
| Drug metabolism - cytochrome P450           | 6 | dehydrogenase [NAD(P)+] | ec:1.2.1.5   | 1 | Solyc06g060250.2 Solyc06g060250.2.1                                                                                                                                                                                                                                                 |
| beta-Alanine metabolism                     | 6 | dehydrogenase [NAD(P)+] | ec:1.2.1.5   | 1 | Solyc06g060250.2 Solyc06g060250.2.1                                                                                                                                                                                                                                                 |
| beta-Alanine metabolism                     | 6 | oxidase                 | ec:1.4.3.21  | 1 | Solyc08g079430.2 Solyc08g079430.2.1                                                                                                                                                                                                                                                 |
| Glyoxylate and dicarboxylate metabolism     | 6 | (Si)-synthase           | ec:2.3.3.1   | 1 | Solyc07g055840.2 Solyc07g055840.2.1                                                                                                                                                                                                                                                 |
| Drug metabolism - cytochrome P450           | 6 | transferase             | ec:2.5.1.18  | 4 | Solyc07g056460.2 Solyc07g056460.2.1,<br>Solyc01g102660.2 Solyc01g102660.2.1,<br>Solyc09g011590.2 Solyc09g011590.2.1,<br>Solyc09g011580.2 Solyc09g011580.2.1                                                                                                                         |
| Cysteine and methionine metabolism          | 6 | synthase                | ec:2.5.1.47  | 2 | Solyc01g094790.2 Solyc01g094790.2.1,<br>Solyc09g082060.2 Solyc09g082060.2.1                                                                                                                                                                                                         |
| Purine metabolism                           | 6 | DNA polymerase          | ec:2.7.7.7   | 2 | Solyc02g093300.2 Solyc02g093300.2.1,<br>Solyc05g014540.2 Solyc05g014540.2.1                                                                                                                                                                                                         |
| Pentose and glucuronate interconversions    | 6 | pectin demethoxylase    | ec:3.1.1.11  | 3 | Solyc03g123620.2 Solyc03g123620.2.1,<br>Solyc12g008530.1 Solyc12g008530.1.1,<br>Solyc12g099190.1 Solyc12g099190.1.1                                                                                                                                                                 |
| Cysteine and methionine metabolism          | 6 | synthase                | ec:3.1.3.77  | 1 | Solyc10g007050.2 Solyc10g007050.2.1                                                                                                                                                                                                                                                 |
| Pentose and glucuronate interconversions    | 6 | pectin depolymerase     | ec:3.2.1.15  | 2 | Solyc05g005170.2 Solyc05g005170.2.1,<br>Solyc04g008230.2 Solyc04g008230.2.1                                                                                                                                                                                                         |

|                                              |   |                                  |              |   |                                                                                                                                                             |
|----------------------------------------------|---|----------------------------------|--------------|---|-------------------------------------------------------------------------------------------------------------------------------------------------------------|
| beta-Alanine metabolism                      | 6 | hydantoinase                     | ec:3.5.2.2   | 1 | Solyc11g064920.1 Solyc11g064920.1.1                                                                                                                         |
| Purine metabolism                            | 6 | allantoinase                     | ec:3.5.2.5   | 1 | Solyc02g078400.2 Solyc02g078400.2.1                                                                                                                         |
| Purine metabolism                            | 6 | adenylpyrophosphatase            | ec:3.6.1.3   | 3 | Solyc03g007690.1 Solyc03g007690.1.1,<br>Solyc05g053600.2 Solyc05g053600.2.1,<br>Solyc09g091660.2 Solyc09g091660.2.1                                         |
| beta-Alanine metabolism                      | 6 | decarboxylase                    | ec:4.1.1.15  | 2 | Solyc03g098240.2 Solyc03g098240.2.1,<br>Solyc11g011920.1 Solyc11g011920.1.1                                                                                 |
| Glyoxylate and dicarboxylate metabolism      | 6 | carboxylase                      | ec:4.1.1.39  | 1 | Solyc02g085940.2 Solyc02g085940.2.1                                                                                                                         |
| Cysteine and methionine metabolism           | 6 | 1-phosphate dehydratase          | ec:4.2.1.109 | 1 | Solyc10g007050.2 Solyc10g007050.2.1                                                                                                                         |
| Glyoxylate and dicarboxylate metabolism      | 6 | ligase                           | ec:6.2.1.8   | 1 | Solyc03g025720.2 Solyc03g025720.2.1                                                                                                                         |
| Fatty acid degradation                       | 5 | dehydrogenase                    | ec:1.1.1.35  | 1 | Solyc07g063010.2 Solyc07g063010.2.1                                                                                                                         |
| Ascorbate and aldarate metabolism            | 5 | oxidase                          | ec:1.10.3.3  | 2 | Solyc07g052240.2 Solyc07g052240.2.1,<br>Solyc08g079090.2 Solyc08g079090.2.1                                                                                 |
| Ascorbate and aldarate metabolism            | 5 | peroxidase                       | ec:1.11.1.11 | 2 | Solyc06g060260.2 Solyc06g060260.2.1,<br>Solyc09g007270.2 Solyc09g007270.2.1                                                                                 |
| Fatty acid degradation                       | 5 | 1-monooxygenase                  | ec:1.14.15.3 | 1 | Solyc01g094750.2 Solyc01g094750.2.1                                                                                                                         |
| Fatty acid degradation                       | 5 | dehydrogenase (NAD+)             | ec:1.2.1.3   | 1 | Solyc03g114150.2 Solyc03g114150.2.1                                                                                                                         |
| Ascorbate and aldarate metabolism            | 5 | dehydrogenase (NAD+)             | ec:1.2.1.3   | 1 | Solyc03g114150.2 Solyc03g114150.2.1                                                                                                                         |
| Metabolism of xenobiotics by cytochrome P450 | 5 | dehydrogenase [NAD(P)+]          | ec:1.2.1.5   | 1 | Solyc06g060250.2 Solyc06g060250.2.1                                                                                                                         |
| Metabolism of xenobiotics by cytochrome P450 | 5 | transferase                      | ec:2.5.1.18  | 4 | Solyc07g056460.2 Solyc07g056460.2.1,<br>Solyc01g102660.2 Solyc01g102660.2.1,<br>Solyc09g011590.2 Solyc09g011590.2.1,<br>Solyc09g011580.2 Solyc09g011580.2.1 |
| Alanine, aspartate and glutamate metabolism  | 5 | asparaginase II                  | ec:3.5.1.1   | 1 | Solyc04g078460.2 Solyc04g078460.2.1                                                                                                                         |
| Alanine, aspartate and glutamate metabolism  | 5 | glutaminase I                    | ec:3.5.1.2   | 1 | Solyc11g069290.1 Solyc11g069290.1.1                                                                                                                         |
| Alanine, aspartate and glutamate metabolism  | 5 | decarboxylase                    | ec:4.1.1.15  | 2 | Solyc03g098240.2 Solyc03g098240.2.1,<br>Solyc11g011920.1 Solyc11g011920.1.1                                                                                 |
| Fatty acid degradation                       | 5 | isomerase                        | ec:5.3.3.8   | 1 | Solyc06g053670.1 Solyc06g053670.1.1                                                                                                                         |
| Fatty acid degradation                       | 5 | ligase                           | ec:6.2.1.3   | 1 | Solyc01g099100.2 Solyc01g099100.2.1                                                                                                                         |
| Alanine, aspartate and glutamate metabolism  | 5 | synthase (glutamine-hydrolysing) | ec:6.3.5.4   | 1 | Solyc06g007180.2 Solyc06g007180.2.1                                                                                                                         |
| Phenylalanine metabolism                     | 4 | dehydrogenase                    | ec:1.1.1.157 | 1 | Solyc07g063010.2 Solyc07g063010.2.1                                                                                                                         |
| Butanoate metabolism                         | 4 | dehydrogenase                    | ec:1.1.1.157 | 1 | Solyc07g063010.2 Solyc07g063010.2.1                                                                                                                         |
| Valine, leucine and isoleucine degradation   | 4 | dehydrogenase                    | ec:1.1.1.35  | 1 | Solyc07g063010.2 Solyc07g063010.2.1                                                                                                                         |
| Butanoate metabolism                         | 4 | dehydrogenase                    | ec:1.1.1.35  | 1 | Solyc07g063010.2 Solyc07g063010.2.1                                                                                                                         |
| Tyrosine metabolism                          | 4 | 1,2-dioxygenase                  | ec:1.13.11.5 | 1 | Solyc12g014100.1 Solyc12g014100.1.1                                                                                                                         |
| Valine, leucine and isoleucine degradation   | 4 | dehydrogenase (NAD+)             | ec:1.2.1.3   | 1 | Solyc03g114150.2 Solyc03g114150.2.1                                                                                                                         |
| Phenylalanine metabolism                     | 4 | dehydrogenase [NAD(P)+]          | ec:1.2.1.5   | 1 | Solyc06g060250.2 Solyc06g060250.2.1                                                                                                                         |
| Tyrosine metabolism                          | 4 | dehydrogenase [NAD(P)+]          | ec:1.2.1.5   | 1 | Solyc06g060250.2 Solyc06g060250.2.1                                                                                                                         |
| Valine, leucine and isoleucine degradation   | 4 | dehydrogenase                    | ec:1.3.99.12 | 1 | Solyc06g073560.2 Solyc06g073560.2.1                                                                                                                         |
| Phenylalanine metabolism                     | 4 | oxidase                          | ec:1.4.3.21  | 1 | Solyc08g079430.2 Solyc08g079430.2.1                                                                                                                         |
| Tyrosine metabolism                          | 4 | oxidase                          | ec:1.4.3.21  | 1 | Solyc08g079430.2 Solyc08g079430.2.1                                                                                                                         |

|                                             |   |                                                                                                   |              |   |                                                                             |
|---------------------------------------------|---|---------------------------------------------------------------------------------------------------|--------------|---|-----------------------------------------------------------------------------|
| Valine, leucine and isoleucine degradation  | 4 | synthase                                                                                          | ec:2.3.3.10  | 1 | Solyc08g007790.2 Solyc08g007790.2.1                                         |
| Butanoate metabolism                        | 4 | synthase                                                                                          | ec:2.3.3.10  | 1 | Solyc08g007790.2 Solyc08g007790.2.1                                         |
| Pyrimidine metabolism                       | 4 | DNA polymerase                                                                                    | ec:2.7.7.7   | 2 | Solyc02g093300.2 Solyc02g093300.2.1,<br>Solyc05g014540.2 Solyc05g014540.2.1 |
| Phenylalanine metabolism                    | 4 | hydrolase                                                                                         | ec:3.5.1.32  | 1 | Solyc03g121270.2 Solyc03g121270.2.1                                         |
| Pyrimidine metabolism                       | 4 | hydantoinase                                                                                      | ec:3.5.2.2   | 1 | Solyc11g064920.1 Solyc11g064920.1.1                                         |
| Pyrimidine metabolism                       | 4 | diphosphatase                                                                                     | ec:3.6.1.23  | 1 | Solyc01g100030.2 Solyc01g100030.2.1                                         |
| Butanoate metabolism                        | 4 | decarboxylase                                                                                     | ec:4.1.1.15  | 2 | Solyc03g098240.2 Solyc03g098240.2.1,<br>Solyc11g011920.1 Solyc11g011920.1.1 |
| Tyrosine metabolism                         | 4 | isomerase                                                                                         | ec:5.2.1.2   | 1 | Solyc01g102660.2 Solyc01g102660.2.1                                         |
| Tryptophan metabolism                       | 3 | dehydrogenase                                                                                     | ec:1.1.1.35  | 1 | Solyc07g063010.2 Solyc07g063010.2.1                                         |
| Lysine degradation                          | 3 | dehydrogenase                                                                                     | ec:1.1.1.35  | 1 | Solyc07g063010.2 Solyc07g063010.2.1                                         |
| Pyruvate metabolism                         | 3 | dehydrogenase                                                                                     | ec:1.1.1.37  | 1 | Solyc02g063490.2 Solyc02g063490.2.1                                         |
| Pyruvate metabolism                         | 3 | dehydrogenase (oxaloacetate-decarboxylating)                                                      | ec:1.1.1.38  | 1 | Solyc05g050120.2 Solyc05g050120.2.1                                         |
| Tryptophan metabolism                       | 3 | equilase                                                                                          | ec:1.11.1.6  | 1 | Solyc12g094620.1 Solyc12g094620.1.1                                         |
| Arginine and proline metabolism             | 3 | dehydrogenase (NAD+)                                                                              | ec:1.2.1.3   | 1 | Solyc03g114150.2 Solyc03g114150.2.1                                         |
| Pyruvate metabolism                         | 3 | dehydrogenase (NAD+)                                                                              | ec:1.2.1.3   | 1 | Solyc03g114150.2 Solyc03g114150.2.1                                         |
| Tryptophan metabolism                       | 3 | dehydrogenase (NAD+)                                                                              | ec:1.2.1.3   | 1 | Solyc03g114150.2 Solyc03g114150.2.1                                         |
| Lysine degradation                          | 3 | dehydrogenase (NAD+)                                                                              | ec:1.2.1.3   | 1 | Solyc03g114150.2 Solyc03g114150.2.1                                         |
| Arginine and proline metabolism             | 3 | dehydrogenase                                                                                     | ec:1.2.1.41  | 2 | Solyc12g044630.1 Solyc12g044630.1.1,<br>Solyc06g019170.2 Solyc06g019170.2.1 |
| Glycine, serine and threonine metabolism    | 3 | oxidase                                                                                           | ec:1.4.3.21  | 1 | Solyc08g079430.2 Solyc08g079430.2.1                                         |
| Lysine degradation                          | 3 | dehydrogenase (NADP+, L-glutamate-forming)                                                        | ec:1.5.1.10  | 1 | Solyc07g017610.2 Solyc07g017610.2.1                                         |
| Lysine degradation                          | 3 | dehydrogenase (NADP+, L-lysine-forming)                                                           | ec:1.5.1.8   | 1 | Solyc07g017610.2 Solyc07g017610.2.1                                         |
| Glycine, serine and threonine metabolism    | 3 | S-aminomethyldihydropolypolprotein:(6S)-tetrahydrofolate aminomethyltransferase (ammonia-forming) | ec:2.1.2.10  | 1 | Solyc01g104060.2 Solyc01g104060.2.1                                         |
| Arginine and proline metabolism             | 3 | 5-kinase                                                                                          | ec:2.7.2.11  | 2 | Solyc12g044630.1 Solyc12g044630.1.1,<br>Solyc06g019170.2 Solyc06g019170.2.1 |
| Glycine, serine and threonine metabolism    | 3 | aldolase                                                                                          | ec:4.1.2.5   | 1 | Solyc04g009960.2 Solyc04g009960.2.1                                         |
| Fatty acid biosynthesis                     | 2 | reductase                                                                                         | ec:1.1.1.100 | 1 | Solyc12g045030.1 Solyc12g045030.1.1                                         |
| Terpenoid backbone biosynthesis             | 2 | reductase (NADPH)                                                                                 | ec:1.1.1.34  | 1 | Solyc02g082260.2 Solyc02g082260.2.1                                         |
| Carbon fixation pathways in prokaryotes     | 2 | dehydrogenase                                                                                     | ec:1.1.1.35  | 1 | Solyc07g063010.2 Solyc07g063010.2.1                                         |
| Caprolactam degradation                     | 2 | dehydrogenase                                                                                     | ec:1.1.1.35  | 1 | Solyc07g063010.2 Solyc07g063010.2.1                                         |
| Carbon fixation pathways in prokaryotes     | 2 | dehydrogenase                                                                                     | ec:1.1.1.37  | 1 | Solyc02g063490.2 Solyc02g063490.2.1                                         |
| Methane metabolism                          | 2 | dehydrogenase                                                                                     | ec:1.1.1.37  | 1 | Solyc02g063490.2 Solyc02g063490.2.1                                         |
| Carbon fixation in photosynthetic organisms | 2 | dehydrogenase                                                                                     | ec:1.1.1.37  | 1 | Solyc02g063490.2 Solyc02g063490.2.1                                         |
| Citrate cycle (TCA cycle)                   | 2 | dehydrogenase                                                                                     | ec:1.1.1.37  | 1 | Solyc02g063490.2 Solyc02g063490.2.1                                         |
| Styrene degradation                         | 2 | 1,2-dioxygenase                                                                                   | ec:1.13.11.5 | 1 | Solyc12g014100.1 Solyc12g014100.1.1                                         |

|                                             |   |                               |              |   |                                                                             |
|---------------------------------------------|---|-------------------------------|--------------|---|-----------------------------------------------------------------------------|
| Caprolactam degradation                     | 2 | 1-monooxygenase               | ec:1.14.15.3 | 1 | Solyc01g094750.2 Solyc01g094750.2.1                                         |
| Retinol metabolism                          | 2 | 1-monooxygenase               | ec:1.14.15.3 | 1 | Solyc01g094750.2 Solyc01g094750.2.1                                         |
| Methane metabolism                          | 2 | dehydrogenase                 | ec:1.2.1.2   | 1 | Solyc02g086880.2 Solyc02g086880.2.1                                         |
| Glycolysis / Gluconeogenesis                | 2 | dehydrogenase (NAD+)          | ec:1.2.1.3   | 1 | Solyc03g114150.2 Solyc03g114150.2.1                                         |
| Histidine metabolism                        | 2 | dehydrogenase (NAD+)          | ec:1.2.1.3   | 1 | Solyc03g114150.2 Solyc03g114150.2.1                                         |
| Retinol metabolism                          | 2 | dehydrogenase                 | ec:1.2.1.36  | 1 | Solyc03g114150.2 Solyc03g114150.2.1                                         |
| Carbapenem biosynthesis                     | 2 | dehydrogenase                 | ec:1.2.1.41  | 2 | Solyc12g044630.1 Solyc12g044630.1.1,<br>Solyc06g019170.2 Solyc06g019170.2.1 |
| Glycolysis / Gluconeogenesis                | 2 | dehydrogenase [NAD(P)+]       | ec:1.2.1.5   | 1 | Solyc06g060250.2 Solyc06g060250.2.1                                         |
| Histidine metabolism                        | 2 | dehydrogenase [NAD(P)+]       | ec:1.2.1.5   | 1 | Solyc06g060250.2 Solyc06g060250.2.1                                         |
| Porphyrin and chlorophyll metabolism        | 2 | oxidase                       | ec:1.3.3.5   | 1 | Solyc05g008290.2 Solyc05g008290.2.1                                         |
| Citrate cycle (TCA cycle)                   | 2 | (Si)-synthase                 | ec:2.3.3.1   | 1 | Solyc07g055840.2 Solyc07g055840.2.1                                         |
| Terpenoid backbone biosynthesis             | 2 | synthase                      | ec:2.3.3.10  | 1 | Solyc08g007790.2 Solyc08g007790.2.1                                         |
| Galactose metabolism                        | 2 | 3-alpha-galactosyltransferase | ec:2.4.1.123 | 1 | Solyc01g079170.2 Solyc01g079170.2.1                                         |
| Sulfur metabolism                           | 2 | synthase                      | ec:2.5.1.47  | 2 | Solyc01g094790.2 Solyc01g094790.2.1,<br>Solyc09g082060.2 Solyc09g082060.2.1 |
| Inositol phosphate metabolism               | 2 | 5-kinase                      | ec:2.7.1.68  | 1 | Solyc04g015470.2 Solyc04g015470.2.1                                         |
| Phosphatidylinositol signaling system       | 2 | 5-kinase                      | ec:2.7.1.68  | 1 | Solyc04g015470.2 Solyc04g015470.2.1                                         |
| Phosphatidylinositol signaling system       | 2 | kinase C                      | ec:2.7.11.13 | 1 | Solyc02g087510.2 Solyc02g087510.2.1                                         |
| Carbapenem biosynthesis                     | 2 | 5-kinase                      | ec:2.7.2.11  | 2 | Solyc12g044630.1 Solyc12g044630.1.1,<br>Solyc06g019170.2 Solyc06g019170.2.1 |
| Drug metabolism - other enzymes             | 2 | ali-esterase                  | ec:3.1.1.1   | 1 | Solyc05g013690.2 Solyc05g013690.2.1                                         |
| Galactose metabolism                        | 2 | lactase (ambiguous)           | ec:3.2.1.23  | 1 | Solyc03g019890.2 Solyc03g019890.2.1                                         |
| Cyanoamino acid metabolism                  | 2 | asparaginase II               | ec:3.5.1.1   | 1 | Solyc04g078460.2 Solyc04g078460.2.1                                         |
| Drug metabolism - other enzymes             | 2 | hydantoinase                  | ec:3.5.2.2   | 1 | Solyc11g064920.1 Solyc11g064920.1.1                                         |
| Taurine and hypotaurine metabolism          | 2 | decarboxylase                 | ec:4.1.1.15  | 2 | Solyc03g098240.2 Solyc03g098240.2.1,<br>Solyc11g011920.1 Solyc11g011920.1.1 |
| Carbon fixation in photosynthetic organisms | 2 | carboxylase                   | ec:4.1.1.39  | 1 | Solyc02g085940.2 Solyc02g085940.2.1                                         |
| Nitrogen metabolism                         | 2 | dehydratase                   | ec:4.2.1.1   | 1 | Solyc02g067750.2 Solyc02g067750.2.1                                         |
| Nitrogen metabolism                         | 2 | cyanate lyase                 | ec:4.2.1.104 | 1 | Solyc09g090430.2 Solyc09g090430.2.1                                         |
| Cyanoamino acid metabolism                  | 2 | synthase                      | ec:4.4.1.9   | 1 | Solyc01g094790.2 Solyc01g094790.2.1                                         |
| Styrene degradation                         | 2 | isomerase                     | ec:5.2.1.2   | 1 | Solyc01g102660.2 Solyc01g102660.2.1                                         |
| Inositol phosphate metabolism               | 2 | synthase                      | ec:5.5.1.4   | 1 | Solyc05g051850.2 Solyc05g051850.2.1                                         |
| Fatty acid biosynthesis                     | 2 | ligase                        | ec:6.2.1.3   | 1 | Solyc01g099100.2 Solyc01g099100.2.1                                         |
| Porphyrin and chlorophyll metabolism        | 2 | chelataase                    | ec:6.6.1.1   | 1 | Solyc11g007200.1 Solyc11g007200.1.1                                         |
| Biosynthesis of unsaturated fatty acids     | 1 | reductase                     | ec:1.1.1.100 | 1 | Solyc12g045030.1 Solyc12g045030.1.1                                         |
| Biotin metabolism                           | 1 | reductase                     | ec:1.1.1.100 | 1 | Solyc12g045030.1 Solyc12g045030.1.1                                         |
| Benzoate degradation                        | 1 | dehydrogenase                 | ec:1.1.1.157 | 1 | Solyc07g063010.2 Solyc07g063010.2.1                                         |
| Toluene degradation                         | 1 | dehydrogenase                 | ec:1.1.1.35  | 1 | Solyc07g063010.2 Solyc07g063010.2.1                                         |

|                                                                         |   |                                                                                                  |               |   |                                     |
|-------------------------------------------------------------------------|---|--------------------------------------------------------------------------------------------------|---------------|---|-------------------------------------|
| Geraniol degradation                                                    | 1 | dehydrogenase                                                                                    | ec:1.1.1.35   | 1 | Solyc07g063010.2 Solyc07g063010.2.1 |
| Primary bile acid biosynthesis                                          | 1 | dehydrogenase                                                                                    | ec:1.1.1.35   | 1 | Solyc07g063010.2 Solyc07g063010.2.1 |
| Benzoate degradation                                                    | 1 | dehydrogenase                                                                                    | ec:1.1.1.35   | 1 | Solyc07g063010.2 Solyc07g063010.2.1 |
| Fatty acid elongation                                                   | 1 | dehydrogenase                                                                                    | ec:1.1.1.35   | 1 | Solyc07g063010.2 Solyc07g063010.2.1 |
| Vitamin B6 metabolism                                                   | 1 | 4-dehydrogenase                                                                                  | ec:1.1.1.65   | 1 | Solyc09g082730.2 Solyc09g082730.2.1 |
| alpha-Linolenic acid metabolism                                         | 1 | 13S-lipoxygenase                                                                                 | ec:1.13.11.12 | 1 | Solyc01g006540.2 Solyc01g006540.2.1 |
| Linoleic acid metabolism                                                | 1 | 13S-lipoxygenase                                                                                 | ec:1.13.11.12 | 1 | Solyc01g006540.2 Solyc01g006540.2.1 |
| Arachidonic acid metabolism                                             | 1 | 1-monooxygenase                                                                                  | ec:1.14.15.3  | 1 | Solyc01g094750.2 Solyc01g094750.2.1 |
| Chloroalkane and chloroalkene degradation                               | 1 | dehydrogenase (NAD+)                                                                             | ec:1.2.1.3    | 1 | Solyc03g114150.2 Solyc03g114150.2.1 |
| Limonene and pinene degradation                                         | 1 | dehydrogenase (NAD+)                                                                             | ec:1.2.1.3    | 1 | Solyc03g114150.2 Solyc03g114150.2.1 |
| Glycerolipid metabolism                                                 | 1 | dehydrogenase (NAD+)                                                                             | ec:1.2.1.3    | 1 | Solyc03g114150.2 Solyc03g114150.2.1 |
| Tropane, piperidine and pyridine alkaloid biosynthesis                  | 1 | oxidase                                                                                          | ec:1.4.3.21   | 1 | Solyc08g079430.2 Solyc08g079430.2.1 |
| Isoquinoline alkaloid biosynthesis                                      | 1 | oxidase                                                                                          | ec:1.4.3.21   | 1 | Solyc08g079430.2 Solyc08g079430.2.1 |
| Lysine biosynthesis                                                     | 1 | dehydrogenase (NADP+, L-glutamate-forming)                                                       | ec:1.5.1.10   | 1 | Solyc07g017610.2 Solyc07g017610.2.1 |
| Zeatin biosynthesis                                                     | 1 | dehydrogenase                                                                                    | ec:1.5.99.12  | 1 | Solyc04g016430.2 Solyc04g016430.2.1 |
| One carbon pool by folate                                               | 1 | S-aminomethyldihydrofoloylprotein:(6S)-tetrahydrofolate aminomethyltransferase (ammonia-forming) | ec:2.1.2.10   | 1 | Solyc01g104060.2 Solyc01g104060.2.1 |
| Synthesis and degradation of ketone bodies                              | 1 | synthase                                                                                         | ec:2.3.3.10   | 1 | Solyc08g007790.2 Solyc08g007790.2.1 |
| Anthocyanin biosynthesis                                                | 1 | 3-O-glucosyltransferase                                                                          | ec:2.4.1.115  | 1 | Solyc10g083860.1 Solyc10g083860.1.1 |
| Glycosaminoglycan biosynthesis - heparan sulfate / heparin              | 1 | 3-beta-galactosyltransferase                                                                     | ec:2.4.1.134  | 1 | Solyc08g069060.2 Solyc08g069060.2.1 |
| Glycosaminoglycan biosynthesis - chondroitin sulfate / dermatan sulfate | 1 | 3-beta-galactosyltransferase                                                                     | ec:2.4.1.134  | 1 | Solyc08g069060.2 Solyc08g069060.2.1 |
| Phenylalanine, tyrosine and tryptophan biosynthesis                     | 1 | synthase                                                                                         | ec:2.5.1.54   | 1 | Solyc01g105420.2 Solyc01g105420.2.1 |
| T cell receptor signaling pathway                                       | 1 | protein-tyrosine kinase                                                                          | ec:2.7.10.2   | 1 | Solyc04g011520.2 Solyc04g011520.2.1 |
| Indole alkaloid biosynthesis                                            | 1 | esterase                                                                                         | ec:3.1.1.78   | 1 | Solyc03g044790.2 Solyc03g044790.2.1 |
| Ether lipid metabolism                                                  | 1 | D                                                                                                | ec:3.1.4.4    | 1 | Solyc03g116620.2 Solyc03g116620.2.1 |
| Glycerophospholipid metabolism                                          | 1 | D                                                                                                | ec:3.1.4.4    | 1 | Solyc03g116620.2 Solyc03g116620.2.1 |
| Other glycan degradation                                                | 1 | lactase (ambiguous)                                                                              | ec:3.2.1.23   | 1 | Solyc03g019890.2 Solyc03g019890.2.1 |
| Glycosphingolipid biosynthesis - ganglio series                         | 1 | lactase (ambiguous)                                                                              | ec:3.2.1.23   | 1 | Solyc03g019890.2 Solyc03g019890.2.1 |
| Sphingolipid metabolism                                                 | 1 | lactase (ambiguous)                                                                              | ec:3.2.1.23   | 1 | Solyc03g019890.2 Solyc03g019890.2.1 |
| Glycosaminoglycan degradation                                           | 1 | lactase (ambiguous)                                                                              | ec:3.2.1.23   | 1 | Solyc03g019890.2 Solyc03g019890.2.1 |
| Biosynthesis of siderophore group nonribosomal peptides                 | 1 | 2,3-dihydro-2,3-dihydroxybenzoate synthase                                                       | ec:3.3.2.1    | 1 | Solyc01g007920.2 Solyc01g007920.2.1 |
| Nicotinate and nicotinamide metabolism                                  | 1 | nicotinamide deaminase                                                                           | ec:3.5.1.19   | 1 | Solyc01g106000.2 Solyc01g106000.2.1 |
| Arginine biosynthesis                                                   | 1 | glutaminase I                                                                                    | ec:3.5.1.2    | 1 | Solyc11g069290.1 Solyc11g069290.1.1 |
| D-Glutamine and D-glutamate metabolism                                  | 1 | glutaminase I                                                                                    | ec:3.5.1.2    | 1 | Solyc11g069290.1 Solyc11g069290.1.1 |
| Pantothenate and CoA biosynthesis                                       | 1 | hydantoinase                                                                                     | ec:3.5.2.2    | 1 | Solyc11g064920.1 Solyc11g064920.1.1 |

---

|                                             |   |             |             |   |                                     |
|---------------------------------------------|---|-------------|-------------|---|-------------------------------------|
| Valine, leucine and isoleucine biosynthesis | 1 | dehydratase | ec:4.2.1.33 | 1 | Solyc06g060790.1 Solyc06g060790.1.1 |
| Streptomycin biosynthesis                   | 1 | synthase    | ec:5.5.1.4  | 1 | Solyc05g051850.2 Solyc05g051850.2.1 |
| Flavonoid biosynthesis                      | 1 | isomerase   | ec:5.5.1.6  | 1 | Solyc05g010320.2 Solyc05g010320.2.1 |

---

**Supplementary table 8.** Primer name, sequence, amplicon length, name and accession number of the genes used in this study.

| Primer     | Sequence (5'→3')        | Amplicon length (bp) | Name                                              | Accession Number   |
|------------|-------------------------|----------------------|---------------------------------------------------|--------------------|
| EF Fw Rt   | CTCCATTGGGTCGTTTTGCT    | 101                  | Elongation Factor 1 alpha                         | X53043             |
| EF Rv Rt   | GGTCACCTTGGCACCAGTTG    |                      |                                                   |                    |
| AOS Fw     | GATCGGTTTCGTCGGAGAAGAA  | 101                  | Allene oxide synthase                             | AF230371           |
| AOS Rv     | GCGCACTGTTTATTCCCCACT   |                      |                                                   |                    |
| Pin I Fw   | GAAACTCTCATGGCAGCAAAAAG | 114                  | Proteinase inhibitor I                            | K03290             |
| Pin I Rv   | CACCAATAAGTTCTGGCCACAT  |                      |                                                   |                    |
| Pin II Fw  | CCAAAAAGGCCAAATGCTTG    | 116                  | Proteinase inhibitor II                           | K03291             |
| Pin II Rv  | CACAAGACGATTGTTCTGGTGG  |                      |                                                   |                    |
| GCS Fw     | TTGGTGAAGCCTTAACCTCAGCC | 102                  | Germacrene-C-synthase                             | AF03563            |
| GCS Rv     | GCAAATGGTGGTGTGCATCAT   |                      |                                                   |                    |
| AP2 Fw     | GCCATTTGATAACACCGCCC    | 101                  | AP2-like ethylene-responsive transcription factor | Solyc11g010710.1   |
| AP2 Rv     | TGGTTGTAGCGTTGGAAGCA    |                      |                                                   |                    |
| Perox Fw   | GCCAAGAGTTGTCCAAAAGCA   | 82                   | Peroxidase 3                                      | Solyc05g046020.2.1 |
| Perox I Rv | CAGCAGCAAGAGATGGAGCA    |                      |                                                   |                    |
| PRO Fw     | AGAGTCGCTTCCCCTTTTCG    | 87                   | Proline dehydrogenase                             | Solyc02g089620.2.1 |
| PRO Rv     | TCACGCTCTTCTCTACCGA     |                      |                                                   |                    |
| Oleosin Fw | TCGGTTTGTGGATTTGGGGT    | 100                  | Oleosin Bn-V                                      | Solyc03g119820.1.1 |
| Oleosin Rv | CGTAATCAACCCGGTCCGAA    |                      |                                                   |                    |
| ARF9 Fw    | TCCTGACAGCCTCCGATACA    | 103                  | Auxin responsive factor 9                         | Solyc08g082630.2.1 |
| ARF9 Rv    | GTCGGAGTCTGCTGGTTCAA    |                      |                                                   |                    |
| Knotted Fw | TGGACTGTCAAAGGTGGGT     | 80                   | Knotted-like homeobox protein                     | Solyc04g077210.2.1 |
| Knotted Rv | TTGCCTCGCCTCAAACCTTT    |                      |                                                   |                    |
| Al Mar Fw  | TGTGGAAAAGAAGGGGAGCC    | 128                  | Aluminum-activated malate transporter             | Solyc01g007080.2.1 |
| Al Mar Rv  | GCCACAGAGAACATGCAACC    |                      |                                                   |                    |
| Kunitz Fw  | TTGTTGGAGACGGAAGGAAGC   | 128                  | Kunitz-type proteinase inhibitor                  | X73986             |
| Kunitz Rv  | CGGCAAAATGGACAAAGCAC    |                      |                                                   |                    |
| PPO Fw     | TTTGATAGCGGAGTTTGCG     | 111                  | Polyphenoloxylase                                 | BI925947           |
| PPO Rv     | CCACCAGTTCAGTTATCGCCA   |                      |                                                   |                    |
| WRKY40 Fw  | GAAAGACAGGCAGCCACTAGGA  | 103                  | WRKY40                                            | AK326455           |
| WRKY40 Rv  | GCCCATCCCATTTTCACGT     |                      |                                                   |                    |

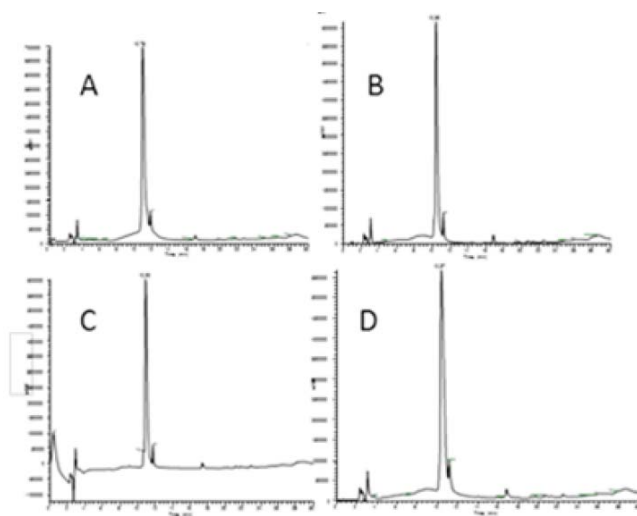

**Figure S1. Stability of the systemin peptide.** HPLC profiles of the systemin peptide incubated in acetic acid/acetate buffer at pH 5 at different time-points. A: reference peptide (0h); B: 6h; C: 24h; D: 48h.



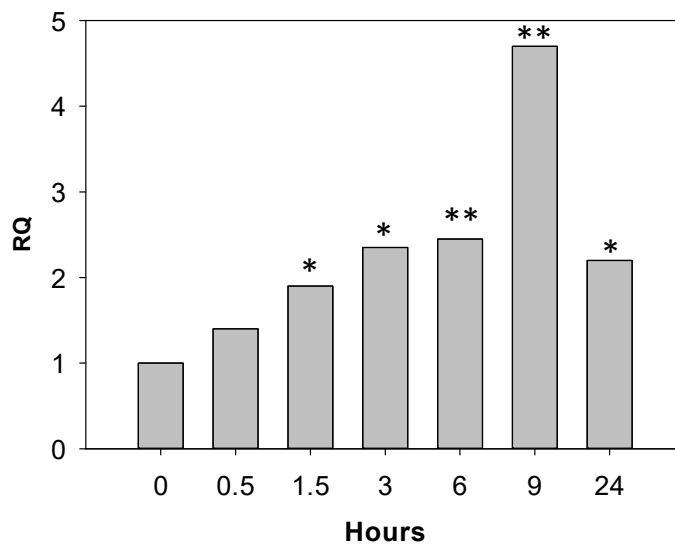

**Figure S2. Time course analysis of the systemin expression in S3 plants.** *Spodoptera littoralis* fourth instar larvae fed for one hour on tomato plants. Subsequently, leaves were harvested at different time points. The relative quantification (RQ) of gene expression by qRT-PCR is expressed relative to the first time of harvesting (0 hours) at end of the larva feeding. Asterisks indicate statistically significant differences compared to 0 hours (\*:  $p < 0.05$ ; \*\*:  $p < 0.01$ ; t-test).
